# Supplementary material for: Ruthenium-catalyzed oxidative coupling of vinylene carbonate with isoxazoles: access to fused anthranils
Source: Royal Society of Chemistry journal article supplement (doi:10.1039/d2cc01048h), 2022-01-01
Supplement: d2cc01048h1.pdf [file d2cc01048h1.pdf]

## Supporting Information

### **Ruthenium-Catalyzed Oxidative Coupling of Vinylene Carbonate with Isoxazoles: Access to Fused Anthranils**

Pravin Kumar and Manmohan Kapur\*

*Department of Chemistry, Indian Institute of Science Education and Research Bhopal,  
Bhopal Bypass Road, Bhauri, Bhopal 462066, MP, India*

*mk@iiserb.ac.in*

#### **Table of contents**

|                                                                        |               |
|------------------------------------------------------------------------|---------------|
| General procedures and experimental details for starting materials     | Pages S2-S6   |
| General procedure for the Ru-catalyzed formylmethylation               | Pages S6-S7   |
| Optimization table                                                     | Page S8       |
| Mechanistic studies                                                    | Pages S8-S10  |
| Analytical data                                                        | Pages S10-S17 |
| Procedure for the TsOH-mediated cyclization                            | Page S17      |
| References                                                             | Page S17      |
| <sup>1</sup> H-, <sup>13</sup> C-NMR spectra of new compounds          | Pages S18-S58 |
| HRMS data for the detection of the intermediates <b>A</b> and <b>D</b> | Pages S59-S60 |
| X-ray diffraction structural analysis data of <b>4a</b>                | Pages S61-S62 |

## Experimental:

### 1 General Methods:

All commercially available compounds were used without purification. Unless otherwise noted, all reactions were performed in oven-dried glassware. All reactions were run under argon or nitrogen atmosphere. All solvents used in the reactions were purified before use. Dry tetrahydrofuran, toluene and diethyl ether were distilled from sodium and benzophenone, whereas dry dimethyl sulfoxide and dimethyl formamide were distilled under reduced pressure from  $\text{CaH}_2$ .<sup>1</sup> Petroleum ether with a boiling range of 40–60 °C was used. Melting points are uncorrected.  $^1\text{H}$ ,  $^{13}\text{C}$  and  $^{19}\text{F}$  NMR: Recorded on Bruker Avance III 400 MHz NMR Spectrometer, Bruker Avance III 500 MHz NMR Spectrometer and Bruker Avance III 700 MHz NMR Spectrometer; spectra were recorded at 295 K in  $\text{CDCl}_3$ ; chemical shifts are calibrated to the residual proton and carbon resonance of the solvent:  $\text{CDCl}_3$  ( $^1\text{H}$   $\delta$  7.26;  $^{13}\text{C}$   $\delta$  77.0). HRMS: Bruker Daltonics MicroTOF Q-II with electron spray ionization (ESI) and Atmospheric Pressure Chemical Ionization (APCI). GC–HRMS: Performed on Agilent 7200 GC–QToF (with Electron Impact (EI), 70eV) with 7890A GC using DB-5 column. GC–LRMS: Performed on Agilent 7890A GC with Agilent 5975C MS (EI 70 eV) using DB-5 column. IR: Perkin Elmer Spectrum BX FTIR, Shimadzu IRAffinity-1 FTIR and were recorded as thin films between KBr plates. Single-crystal X-ray diffraction data was collected using a Bruker SMART APEX II CCD diffractometer with graphite monochromated  $\text{Mo K}\alpha$  ( $\lambda = 0.71073 \text{ \AA}$ ) radiation at low temperature.

### (2) General procedures:

#### I) Preparation of 3,5-diaryl isoxazoles:

**Ia) General procedure for the synthesis of oximes:**<sup>2</sup>  $\text{NaHCO}_3$  (1.2 equiv, 12.97 mmol) was added to a solution of  $\text{NH}_2\text{OH}\cdot\text{HCl}$  (1.2 equiv, 12.97 mmol) in water (20 mL). The resulting solution was then added to a vigorously stirred suspension of the aldehyde (1.0 equiv, 10.81 mmol) in EtOH (20 mL) at room temperature. The progress of the reaction was monitored by TLC. Upon completion of the reaction, the reaction mixture was concentrated under reduced pressure to remove the solvent and the residue was diluted with  $\text{CH}_2\text{Cl}_2$  and washed with brine. The organic extract was dried over anhydrous  $\text{Na}_2\text{SO}_4$ , filtered and concentrated under reduced pressure. The crude product was used as such without any purification.

### **Ib) General procedure for the synthesis of 3, 5-diaryl isoxazoles from the aldoxime:<sup>2</sup>**

Aryl acetylene (1.5 equiv, 5.25 mmol) was added to a solution of aldoxime (1.0 equiv, 3.5 mmol) in water (15 mL) at room temperature. KCl (1.0 equiv, 3.5 mmol) was added portion-wise followed by oxone (1.5 equiv, 5.25 mmol). The resulting mixture was stirred at room temperature for 12 h till the reaction was found to be complete. The mixture was poured into a separatory funnel and extracted with ethyl acetate, followed by washing with brine. The combined organic layer was dried over anhydrous Na<sub>2</sub>SO<sub>4</sub>, filtered, and concentrated under reduced pressure. The residue was purified by silica gel flash column chromatography to result in the desired product.

#### **3, 5-diphenylisoxazole (1a):<sup>2</sup>**

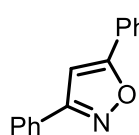

Prepared according to the general procedure and the title compound was isolated in 73% (564 mg) yield. Spectral data obtained were in good agreement with those reported in the literature.

#### **5-phenyl-3-(*o*-tolyl)isoxazole (1b):<sup>2</sup>**

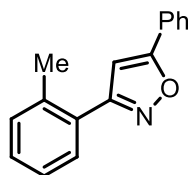

Prepared according to the general procedure and the title compound was isolated in 60% (493 mg) yield. Spectral data obtained were in good agreement with those reported in the literature.

#### **3-(2-methoxyphenyl)-5-phenylisoxazole (1c):<sup>2</sup>**

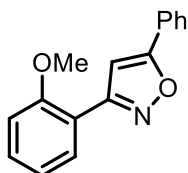

Prepared according to the general procedure and the title compound was isolated in 62% (545 mg) yield. Spectral data obtained were in good agreement with those reported in the literature.

#### **3-(2-fluorophenyl)-5-phenylisoxazole (1d):<sup>2</sup>**

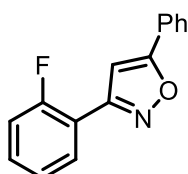

Prepared according to the general procedure and the title compound was isolated in 52% (435 mg) yield. Spectral data obtained were in good agreement with those reported in the literature.

### 3-(2-chlorophenyl)-5-phenylisoxazole (1e):<sup>2</sup>

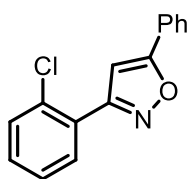

Prepared according to the general procedure and the title compound was isolated in 47% (420 mg) yield. Spectral data obtained were in good agreement with those reported in the literature.

### 3-(2-bromophenyl)-5-phenylisoxazole (1f):<sup>2</sup>

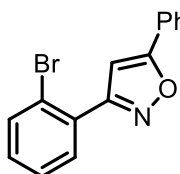

Prepared according to the general procedure and the title compound was isolated in 53% (556 mg) yield. Spectral data obtained were in good agreement with those reported in the literature.

### 3-(2-nitrophenyl)-5-phenylisoxazole (1g):<sup>2</sup>

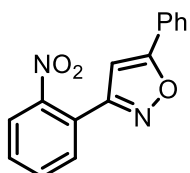

Prepared according to the general procedure and the title compound was isolated in 52% (484 mg) yield; Spectral data obtained were in good agreement with those reported in the literature.

### 3-(3-methoxyphenyl)-5-phenylisoxazole (1h):<sup>2</sup>

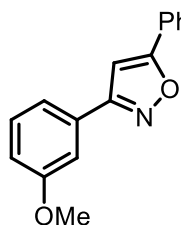

Prepared according to the general procedure and the title compound was isolated in 56% (493 mg) yield. Spectral data obtained were in good agreement with those reported in the literature.

### 5-phenyl-3-(*m*-tolyl)isoxazole (1i):<sup>2</sup>

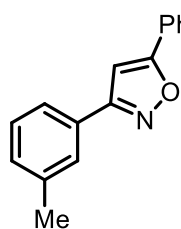

Prepared according to the general procedure and the title compound was isolated in 52% (428 mg) yield. Spectral data obtained were in good agreement with those reported in the literature.

### 5-phenyl-3-(3-(trifluoromethyl)phenyl)isoxazole (1j):<sup>2</sup>

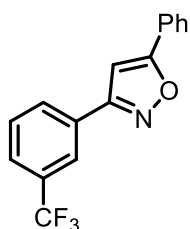

Prepared according to the general procedure and the title compound was isolated in 46% (465 mg) yield. Spectral data obtained were in good agreement with those reported in the literature.



### 3-(4-methoxyphenyl)-5-phenylisoxazole (1k):<sup>2</sup>

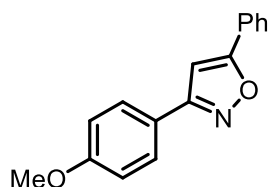

Prepared according to the general procedure and the title compound was isolated in 76% (667 mg) yield. Spectral data obtained were in good agreement with those reported in the literature.

### 5-phenyl-3-(*p*-tolyl)isoxazole (1l):<sup>2</sup>

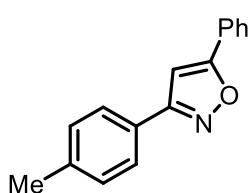

Prepared according to the general procedure and the title compound was isolated in 75% (618 mg) yield. Spectral data obtained were in good agreement with those reported in the literature.

### 3-(4-fluorophenyl)-5-phenylisoxazole (1m):<sup>2</sup>

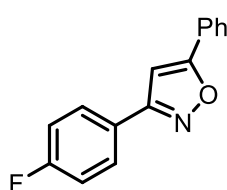

Prepared according to the general procedure and the title compound was isolated in 51% (427 mg) yield. Spectral data obtained were in good agreement with those reported in the literature.

### 4-(5-phenylisoxazol-3-yl)benzonitrile (1n):<sup>2</sup>

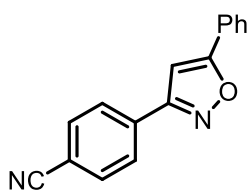

Prepared according to the general procedure and the title compound was isolated in 45% (388 mg) yield. Spectral data obtained were in good agreement with those reported in the literature.

### 3-(4-nitrophenyl)-5-phenylisoxazole (1o):<sup>2</sup>

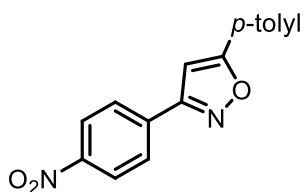

Prepared according to the general procedure and the title compound was isolated in 35% (343 mg) yield. Spectral data obtained were in good agreement with those reported in the literature.

### 3-(4-methoxyphenyl)-5-pentylisoxazole (**1p**):<sup>2,3</sup>

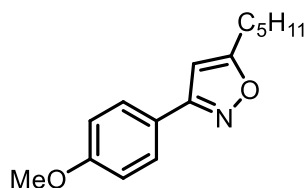

Prepared according to the general procedure and the title compound was isolated in 48% (412 mg) yield. Spectral data obtained were in good agreement with those reported in the literature.

### 3-(4-methoxyphenyl)isoxazole (**1q**):<sup>2,4</sup>

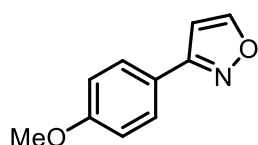

Prepared according to reported literature procedure and the title compound was isolated in 94% (332 mg) yield. Spectral data obtained were in good agreement with those reported in the literature.

### 4-methyl-3,5-diphenylisoxazole (**1r**):<sup>5</sup>

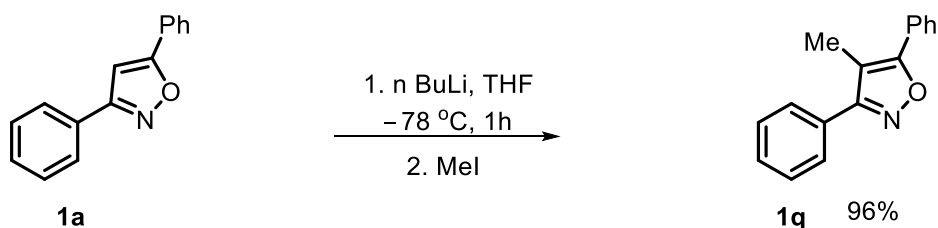

**Procedure:** To a stirred solution of isoxazole **1a** (1.0 equiv, 0.9 mmol) in THF (20 mL) was added dropwise a solution of *n*-butyllithium (1.6 mL of 2.0 M in THF, 3.16 mmol) at  $-78\text{ }^{\circ}\text{C}$ . The resulting reaction mixture was stirred at this temperature for 1 h and quenched with MeI (0.20 mL) to give the desired compound (194 mg) in 90% yield. Spectral data obtained were in good agreement with those reported in the literature.

### (*E*)-5-phenyl-3-styrylisoxazole (**1s**):<sup>2</sup>

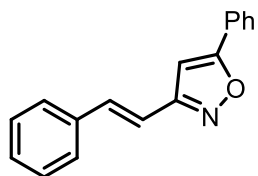

Prepared according to the general procedure and the title compound was isolated in 57% (493 mg) yield. Spectral data obtained were in good agreement with that reported in the literature.

### 3) General procedure for the Ru-catalyzed C-H formyl methylation at 3-aryl ring of isoxazoles:

In a pressure tube equipped with a stir bar, isoxazole (1.0 equiv, 0.1 mmol) was dissolved in HFIP (1.0 mL). The reaction mixture was degassed with nitrogen for 10 min followed by the addition of the vinylene carbonate (2.0 equiv, 0.20 mmol),  $[\text{RuCl}_2(p\text{-cym})]_2$  (5 mol%, 0.005

mmol), AgSbF<sub>6</sub> (0.50 equiv, 0.05 mmol) and PivOH (0.50 equiv, 0.05 mmol). The tube was fitted with a Teflon screw cap under a nitrogen flow, and the reaction mixture was heated to 90 °C and allowed to stir for 24-30 h at that temperature. Upon cooling to room temperature, the reaction mixture was diluted with ethyl acetate and filtered through a pad of Celite. The filtrate was washed with a saturated solution of NaHCO<sub>3</sub> and brine. The organic extract was dried over anhydrous Na<sub>2</sub>SO<sub>4</sub>, filtered, and concentrated under reduced pressure. The crude product was purified by a silica gel flash column chromatography to result in the desired product.

**Table 1: Optimization studies<sup>a,b</sup>**

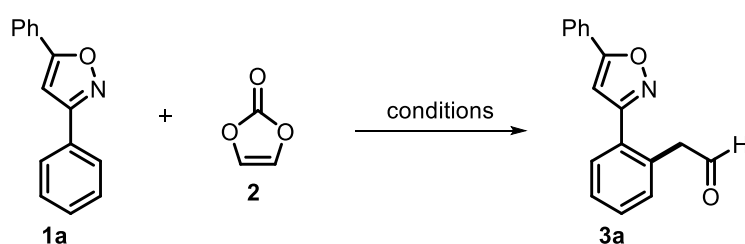

| Entry     | Conditions                                                                                                | Yield <sup>b</sup> (%) |
|-----------|-----------------------------------------------------------------------------------------------------------|------------------------|
| 1         | [RhCl <sub>2</sub> Cp*] <sub>2</sub> (2 mol%)/AgSbF <sub>6</sub> (20 mol%)/DCE/24 h                       | 30                     |
| 2         | [RhCl <sub>2</sub> Cp*] <sub>2</sub> (2 mol%)/AgSbF <sub>6</sub> (50 mol%)/DCE/24 h                       | 35                     |
| 3         | [Cp*Co(CO)I <sub>2</sub> ] (10 mol%)/AgSbF <sub>6</sub> (20 mol%)/DCE/24 h                                | n.d.                   |
| 4         | [RuCl <sub>2</sub> ( <i>p</i> -cym)] <sub>2</sub> /AgSbF <sub>6</sub> (20 mol%)/DCE/24 h                  | 15                     |
| 5         | [RuCl <sub>2</sub> ( <i>p</i> -cym)] <sub>2</sub> /AgSbF <sub>6</sub> (20 mol%)/TFE/24 h                  | 20                     |
| 6         | [RuCl <sub>2</sub> ( <i>p</i> -cym)] <sub>2</sub> /AgSbF <sub>6</sub> (20 mol%)/HFIP/24 h                 | 30                     |
| 7         | [RuCl <sub>2</sub> ( <i>p</i> -cym)] <sub>2</sub> /AgSbF <sub>6</sub> (20 mol%)/ <i>t</i> -BuOH/24 h      | trace                  |
| 8         | [RuCl <sub>2</sub> ( <i>p</i> -cym)] <sub>2</sub> /AgSbF <sub>6</sub> (20 mol%)/MeOH/24 h                 | n.d.                   |
| 9         | [RuCl <sub>2</sub> ( <i>p</i> -cym)] <sub>2</sub> /KPF <sub>6</sub> (10 mol%)/HFIP/24 h                   | n.d.                   |
| 10        | [RuCl <sub>2</sub> ( <i>p</i> -cym)] <sub>2</sub> /AgOAc (20 mol%)/HFIP/24 h                              | trace                  |
| 11        | [RuCl <sub>2</sub> ( <i>p</i> -cym)] <sub>2</sub> /AgSbF <sub>6</sub> (20 mol%)/AcOH (10 mol%)/HFIP/24 h  | trace                  |
| 12        | [RuCl <sub>2</sub> ( <i>p</i> -cym)] <sub>2</sub> /AgSbF <sub>6</sub> (20 mol%)/AgOAc (10 mol%)/HFIP/24 h | trace                  |
| 13        | [RuCl <sub>2</sub> ( <i>p</i> -cym)] <sub>2</sub> /AgSbF <sub>6</sub> (50 mol%)/HFIP/24 h                 | 70                     |
| 14        | [RuCl <sub>2</sub> ( <i>p</i> -cym)] <sub>2</sub> /AgSbF <sub>6</sub> (50 mol%)/AcOH (50 mol%)/HFIP/24 h  | 71                     |
| <b>15</b> | <b>[RuCl<sub>2</sub>(<i>p</i>-cym)]<sub>2</sub>/AgSbF<sub>6</sub> (50 mol%)/PivOH (50 mol%)/HFIP/24 h</b> | <b>75</b>              |
| 16        | AgSbF <sub>6</sub> (50 mol%)/HFIP/24 h                                                                    | n.d.                   |

<sup>a</sup>Unless otherwise specified, all reactions were carried out using **1a** (0.10 mmol), **2** (0.20 mmol), catalyst (0.005 mmol.), additive (0.05 mmol.) PivOH (0.05 mmol.) at 90 °C for 24 h under N<sub>2</sub>; <sup>b</sup>Isolated yields; n.d. = Not detected.

### 3.1) Mechanistic studies

#### 3.1.1) Deuterium exchange experiment:

To check the reversibility of C-H bond cleavage, we performed the reversibility studies. These studies revealed that the C-H bond cleavage is a reversible step.

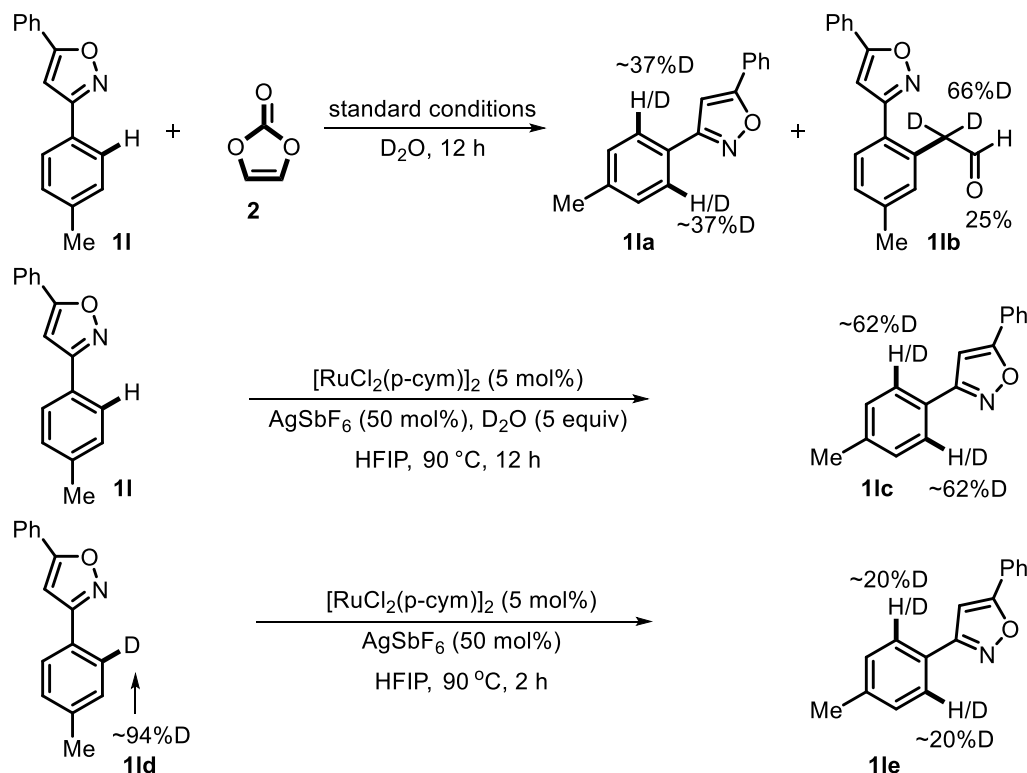

**Procedure:** In a pressure tube equipped with a stir bar, isoxazole (1.0 equiv, 0.1 mmol) was dissolved in HFIP (1.0 mL). The reaction mixture was degassed with nitrogen for 10 min followed by the addition of the vinylene carbonate (2.0 equiv, 0.20 mmol),  $[\text{RuCl}_2(\text{p-cym})]_2$  (5 mol%, 0.005 mmol),  $\text{AgSbF}_6$  (0.50 equiv, 0.05 mmol), and  $\text{D}_2\text{O}$  (5.0 equiv, 0.50 mmol). The tube was fitted with a Teflon screw cap under a nitrogen flow, and the reaction mixture was heated to 90 °C and allowed to stir for 2-12 h. Upon cooling to room temperature, the reaction mixture was diluted with ethyl acetate and filtered through a pad of Celite. The filtrate was washed with saturated solution of  $\text{NaHCO}_3$  and brine. The organic extract was dried over anhydrous  $\text{Na}_2\text{SO}_4$ , filtered and concentrated under reduced pressure. The crude product was purified by a silica gel flash column chromatography to result in the desired product. The same procedure was followed for the other reaction in which no vinylene carbonate was added to the reaction mixture.

### 3.1.2) Deuteration at the *ortho*-position of 3-aryl ring of isoxazole:<sup>2</sup>

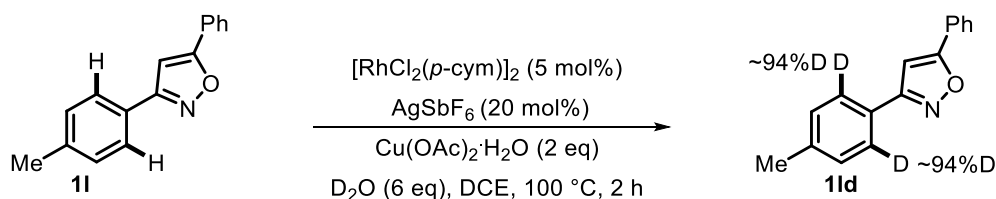

**Procedure:** In a pressure tube equipped with a stir bar, isoxazole (**1l**, 1.0 equiv, 0.452 mmol) was dissolved in dry dichloroethane (2.0 mL). The reaction mixture was degassed with nitrogen for 10 min followed by the addition of  $[\text{RuCl}_2(p\text{-cym})]_2$  (5 mol%, 0.0226 mmol),  $\text{AgSbF}_6$  (0.20 equiv, 0.09 mmol),  $\text{Cu}(\text{OAc})_2 \cdot \text{H}_2\text{O}$  (2.0 equiv, 0.90 mmol) and  $\text{D}_2\text{O}$  (6.0 equiv, 2.71 mmol). The tube was fitted with a Teflon screw cap under a nitrogen flow, and the reaction mixture was heated to 100 °C and allowed to stir for 2 h. Upon cooling to room temperature, the reaction mixture was diluted with ethyl acetate and filtered through a pad of Celite. The filtrate was washed with a saturated solution of  $\text{NaHCO}_3$  and brine. The organic extract was dried over anhydrous  $\text{Na}_2\text{SO}_4$ , filtered and concentrated under reduced pressure. The crude product was purified by a silica gel flash column chromatography to result in the desired deuterated product. This experiment was repeated till complete deuteration of the desired compound.

### 3.1.3) Determination of the kinetic isotope effect ( $k_{\text{H}}/k_{\text{D}}$ ): (Competition experiment):

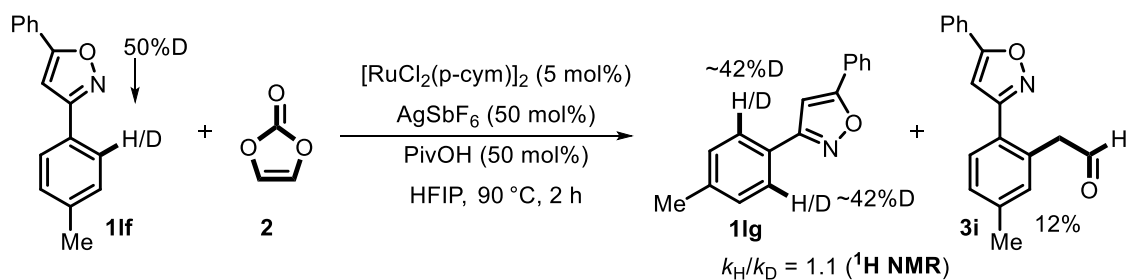

**Procedure:** In a pressure tube equipped with a stir bar, isoxazole **1lf** (1.0 equiv, 0.1 mmol) was dissolved in HFIP (1.0 mL). The reaction mixture was stirred for 10 min followed by the addition of the vinylene carbonate (2.0 equiv, 0.20 mmol),  $[\text{RuCl}_2(p\text{-cym})]_2$  (0.05 equiv, 0.005 mmol),  $\text{AgSbF}_6$  (0.50 equiv, 0.05 mmol) and  $\text{PivOH}$  (0.50 equiv, 0.05 mmol). The tube was fitted with a Teflon screw cap under nitrogen flow, and the reaction mixture was heated to 90 °C and allowed to stir for 2 h. Upon cooling to room temperature, the reaction mixture was diluted with ethyl acetate and filtered through a pad of Celite. The filtrate was washed with a saturated solution of  $\text{NaHCO}_3$  and brine. The organic extract was dried over anhydrous

Na<sub>2</sub>SO<sub>4</sub>, filtered, and concentrated under reduced pressure and the remaining starting materials (C-H and C-D substrates) were recovered and analyzed by <sup>1</sup>H NMR. This experiment indicated a value of 1.1 for *k<sub>H</sub>/k<sub>D</sub>*, which in turn indicated that the C-H metalation step may not be rate-limiting.

### 3.1.4) Mass spectrometry studies for detecting intermediates:

**Procedure:** In a pressure tube equipped with a stir bar, the isoxazole (1.0 equiv, 0.1 mmol) was dissolved in HFIP (1.0 mL). The reaction mixture was stirred for 10 min followed by the addition of the vinylene carbonate (2.0 equiv, 0.20 mmol), [RuCl<sub>2</sub>(*p*-cym)]<sub>2</sub> (0.1 equiv, 0.01 mmol), AgSbF<sub>6</sub> (0.50 equiv, 0.05 mmol) and PivOH (0.50 equiv, 0.05 mmol). The tube was fitted with a Teflon screw cap under nitrogen flow, and the reaction mixture was heated to 90 °C and allowed to stir for 10 min. This reaction mixture was subjected to mass spectrometry (ESI-HRMS). The same procedure was followed for another reaction in which no coupling partner was added.

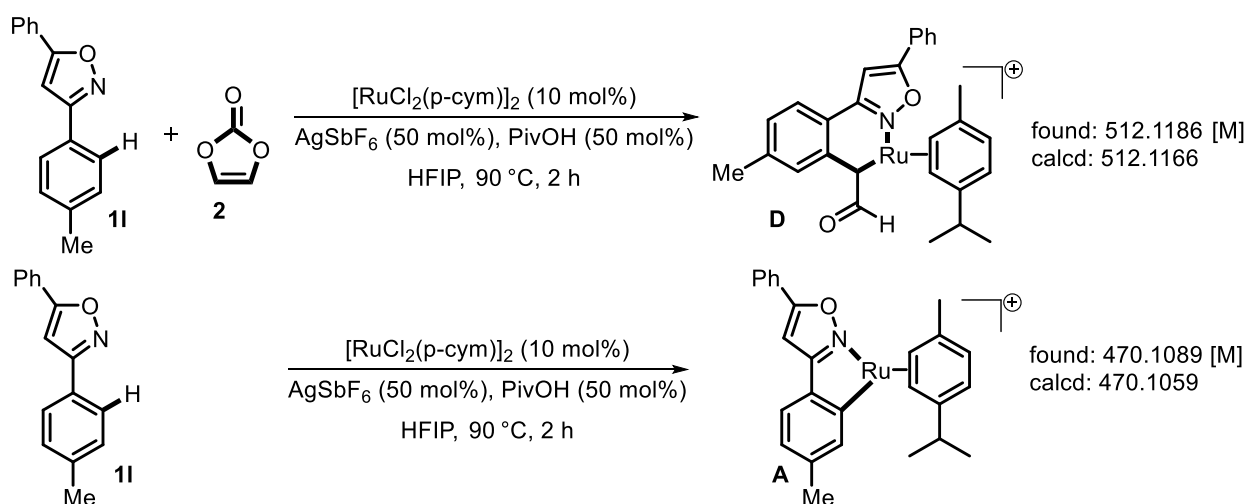

### Analytical data:

#### 2-(2-(5-phenylisoxazol-3-yl)phenyl)acetaldehyde (3a)

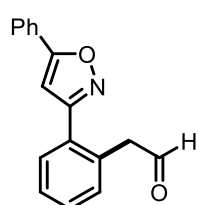

Yield: 75 % (20 mg); Physical appearance: Yellow gel; TLC *R<sub>f</sub>* 0.3 (9:1, Petroleum ether: EtOAc); <sup>1</sup>H NMR (700 MHz, CDCl<sub>3</sub>): δ 9.85 (s, 1H), 7.86 (d, *J* = 7.4 Hz, 2H), 7.67 (d, *J* = 7.3 Hz, 1H), 7.54 – 7.45 (m, 5H), 7.36 (d, *J* = 7.3 Hz, 1H), 6.76 (s, 1H), 4.11 (s, 2H); <sup>13</sup>C NMR (176 MHz, CDCl<sub>3</sub>): δ 199.64, 170.01, 163.02, 132.08, 131.60, 130.40, 129.98, 129.89, 129.26, 129.08, 127.85, 127.19, 125.89, 99.68, 49.26; ESI-HRMS: Calculated for C<sub>17</sub>H<sub>14</sub>NO<sub>2</sub><sup>+</sup> [M+H]<sup>+</sup> 264.1019, found 264.0996.

### 2-(3-methyl-2-(5-phenylisoxazol-3-yl)phenyl)acetaldehyde (3b):

Yield: 69% (19 mg); Physical appearance: Yellow gel; TLC  $R_f$  0.3 (9:1, Petroleum ether:

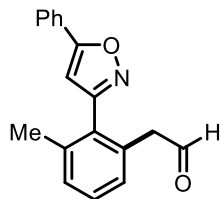

EtOAc);  $^1\text{H NMR}$  (500 MHz,  $\text{CDCl}_3$ ):  $\delta$  9.71 (t,  $J = 1.7$  Hz, 1H), 7.89 – 7.84 (m, 2H), 7.56 – 7.47 (m, 3H), 7.39 (t,  $J = 7.7$  Hz, 1H), 7.30 (d,  $J = 7.5$  Hz, 1H), 7.17 (d,  $J = 7.6$  Hz, 1H), 6.52 (s, 1H), 3.68 (d,  $J = 1.8$  Hz, 2H), 2.30 (s, 3H);  $^{13}\text{C NMR}$  (176 MHz,  $\text{CDCl}_3$ ):  $\delta$  199.31, 170.38, 162.12,

138.22, 131.90, 130.46, 129.78, 129.67, 129.52, 129.09, 128.23, 127.20, 125.93, 100.95, 48.72, 20.54; **ESI–HRMS**: Calculated for  $\text{C}_{18}\text{H}_{15}\text{NNaO}_2^+$   $[\text{M}+\text{Na}]^+$  300.0995, found 300.1003.

### 2-(3-methoxy-2-(5-phenylisoxazol-3-yl)phenyl)acetaldehyde (3c):

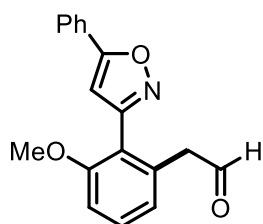

Yield: 71% (20 mg); Physical appearance: Yellow gel; TLC  $R_f$  0.2 (9:1, Petroleum ether: EtOAc);  $^1\text{H NMR}$  (500 MHz,  $\text{CDCl}_3$ ):  $\delta$  9.76 (t,  $J = 1.7$  Hz, 1H), 7.86 (d,  $J = 6.8$  Hz, 2H), 7.52 – 7.43 (m, 4H), 7.00 (d,  $J = 8.3$  Hz, 1H), 6.95 (d,  $J = 7.6$  Hz, 1H), 6.71 (s, 1H), 3.86 (s, 3H), 3.83 (d,  $J = 1.5$  Hz, 2H);  $^{13}\text{C NMR}$  (126 MHz,  $\text{CDCl}_3$ ):  $\delta$  199.40, 169.35,

159.74, 158.29, 133.66, 130.83, 130.13, 128.98, 127.53, 125.87, 123.44, 118.95, 110.23, 102.19, 55.86, 48.71; **ESI–HRMS**: Calculated for  $\text{C}_{18}\text{H}_{16}\text{NO}_3^+$   $[\text{M}+\text{H}]^+$  294.1125, found 294.1111.

### 2-(3-fluoro-2-(5-phenylisoxazol-3-yl)phenyl)acetaldehyde (3d):

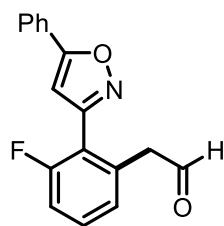

Yield: 54% (15 mg); Physical appearance: Yellow gel; TLC  $R_f$  0.3 (9:1, Petroleum ether: EtOAc);  $^1\text{H NMR}$  (500 MHz,  $\text{CDCl}_3$ ):  $\delta$  9.81 (d,  $J = 1.4$  Hz, 1H), 7.88 – 7.84 (m, 2H), 7.54 – 7.44 (m, 4H), 7.20 (t,  $J = 9.2$  Hz, 1H), 7.15 (d,  $J = 7.6$  Hz, 1H), 6.82 (d,  $J = 3.2$  Hz, 1H), 4.03 (d,  $J = 1.4$  Hz, 2H);  $^{13}\text{C NMR}$  (176 MHz,  $\text{CDCl}_3$ ):  $\delta$  198.70, 169.96, 161.03 (d,  $J = 250.0$  Hz),

157.56, 134.37 (d,  $J = 2.4$  Hz), 131.15 (d,  $J = 9.1$  Hz), 130.41, 129.06, 127.41 (d,  $J = 3.2$  Hz), 127.14, 125.90, 117.88 (d,  $J = 14.0$  Hz), 115.21 (d,  $J = 22.3$  Hz), 101.52 (d,  $J = 6.3$  Hz), 48.79; **ESI–HRMS**: Calculated for  $\text{C}_{17}\text{H}_{13}\text{FNO}_2^+$   $[\text{M}+\text{H}]^+$  282.0925, found 282.0920.

**1,1,1,3,3,3-hexafluoropropan-2-yl 2-(3-chloro-2-(5-phenylisoxazol-3-yl)phenyl)acetate (3e):**

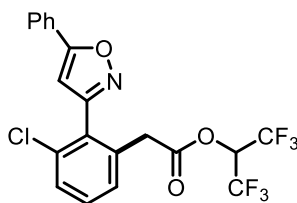

Yield: 51% (23 mg); Physical appearance: Colorless solid; M.p. 67–69 °C; TLC  $R_f$  0.3 (9:1, Petroleum ether: EtOAc);  $^1\text{H NMR}$  (500 MHz,  $\text{CDCl}_3$ ):  $\delta$  7.86 (dd,  $J = 8.0, 1.6$  Hz, 2H), 7.56 – 7.49 (m, 4H), 7.44 (t,  $J = 7.9$  Hz, 1H), 7.33 (d,  $J = 9.0$  Hz, 1H), 6.68 (s, 1H), 5.70 (sept,  $J = 6.1$  Hz, 1H), 3.96 (s, 2H);  $^{13}\text{C NMR}$  (176 MHz,  $\text{CDCl}_3$ ):  $\delta$  170.25, 167.90, 160.17, 134.85, 133.85, 130.71, 130.43, 129.65, 129.24, 129.22, 129.05, 127.14, 125.89, 101.52, 66.96, 66.77, 66.57, 66.37, 38.46;  $^{19}\text{F NMR}$  (376 MHz,  $\text{CDCl}_3$ ):  $\delta$  -73.25; **ESI-HRMS**: Calculated for  $\text{C}_{20}\text{H}_{12}\text{ClF}_6\text{NNaO}_3^+$   $[\text{M}+\text{H}]^+$  486.0302, found 486.0297.

**2-(4-methoxy-2-(5-phenylisoxazol-3-yl)phenyl)acetaldehyde (3f):**

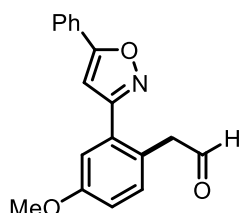

Yield: 78% (23 mg); Physical appearance: Yellow gel; TLC  $R_f$  0.2 (4:1, Petroleum ether: EtOAc);  $^1\text{H NMR}$  (500 MHz,  $\text{CDCl}_3$ ):  $\delta$  9.78 (t,  $J = 1.5$  Hz, 1H), 7.88 – 7.83 (m, 2H), 7.55 – 7.47 (m, 3H), 7.43 (t,  $J = 8.0$  Hz, 1H), 7.24 (d,  $J = 6.7$  Hz, 1H), 7.06 (d,  $J = 8.3$  Hz, 1H), 6.69 (s, 1H), 4.05 (d,  $J = 1.4$  Hz, 2H), 3.90 (s, 3H);  $^{13}\text{C NMR}$  (176 MHz,  $\text{CDCl}_3$ ):  $\delta$  200.14, 169.95, 162.98, 158.27, 130.95, 130.35, 129.05, 128.66, 127.24, 125.89, 121.95, 121.01, 111.55, 100.29, 55.84, 42.46; **ESI-HRMS**: Calculated for  $\text{C}_{18}\text{H}_{15}\text{NNaO}_3^+$   $[\text{M}+\text{Na}]^+$  316.0944, found 316.0950.

**2-(4-methyl-2-(5-phenylisoxazol-3-yl)phenyl)acetaldehyde (3g):**

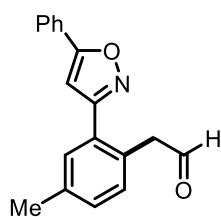

Yield: 71% (20 mg); Physical appearance: Yellow gel; TLC  $R_f$  0.3 (9:1, Petroleum ether: EtOAc);  $^1\text{H NMR}$  (500 MHz,  $\text{CDCl}_3$ ):  $\delta$  9.83 (t,  $J = 1.4$  Hz, 1H), 7.89 – 7.84 (m, 2H), 7.55 – 7.46 (m, 4H), 7.32 – 7.28 (m, 1H), 7.24 (d,  $J = 7.8$  Hz, 1H), 6.75 (s, 1H), 4.06 (d,  $J = 1.2$  Hz, 2H), 2.45 (s, 3H);  $^{13}\text{C NMR}$  (176 MHz,  $\text{CDCl}_3$ ):  $\delta$  199.92, 169.91, 163.11, 137.63, 131.97, 130.74, 130.54, 130.36, 129.06, 129.04, 128.47, 127.24, 125.88, 99.70, 48.84, 21.06; **ESI-HRMS**: Calculated for  $\text{C}_{18}\text{H}_{15}\text{NNaO}_2^+$   $[\text{M}+\text{Na}]^+$  300.0995, found 300.0989.



### 2-(2-(5-phenylisoxazol-3-yl)-4-(trifluoromethyl)phenyl)acetaldehyde (3h):

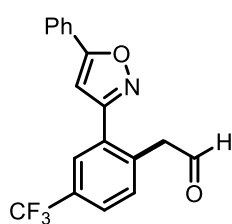

Yield: 66% (22 mg); Physical appearance: Yellow gel; TLC  $R_f$  0.2 (4:1, Petroleum ether: EtOAc);  $^1\text{H NMR}$  (500 MHz,  $\text{CDCl}_3$ ):  $\delta$  9.87 (t,  $J = 1.3$  Hz, 1H), 7.91 (s, 1H), 7.89 – 7.85 (m, 2H), 7.74 (d,  $J = 8.0$  Hz, 1H), 7.57 – 7.48 (m, 4H), 6.80 (s, 1H), 4.22 (s, 2H);  $^{13}\text{C NMR}$  (176 MHz,  $\text{CDCl}_3$ ):  $\delta$  198.20, 170.59, 162.01, 135.72, 132.75, 130.66, 130.43, 130.24, 130.06, 129.15, 126.88, 126.63 (q,  $J = 3.8$  Hz), 126.48 (q,  $J = 3.4$  Hz), 125.94, 124.48, 122.94, 99.44, 49.18;  $^{19}\text{F NMR}$  (376 MHz,  $\text{CDCl}_3$ ):  $\delta$  -62.71; **ESI-HRMS**: Calculated for  $\text{C}_{18}\text{H}_{13}\text{F}_3\text{NO}_2^+$   $[\text{M}+\text{H}]^+$  331.0890, found 331.0900.

### 2-(5-methoxy-2-(5-phenylisoxazol-3-yl)phenyl)acetaldehyde (3i):

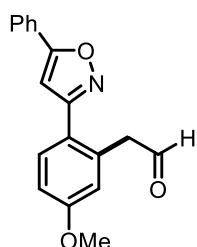

Yield: 77% (22 mg); Physical appearance: Colorless solid; M.p. 79–81 °C; TLC  $R_f$  0.2 (4:1, Petroleum ether: EtOAc);  $^1\text{H NMR}$  (500 MHz,  $\text{CDCl}_3$ ):  $\delta$  9.85 (s, 1H), 7.87 – 7.83 (m, 2H), 7.60 (d,  $J = 8.6$  Hz, 1H), 7.54 – 7.46 (m, 3H), 6.98 (dd,  $J = 8.6, 2.6$  Hz, 1H), 6.87 (d,  $J = 2.6$  Hz, 1H), 6.72 (s, 1H), 4.10 (d,  $J = 1.3$  Hz, 2H), 3.89 (s, 3H);  $^{13}\text{C NMR}$  (176 MHz,  $\text{CDCl}_3$ ):  $\delta$  199.58, 169.71, 162.74, 160.59, 133.26, 131.24, 130.31, 129.04, 127.28, 125.86, 121.58, 117.51, 113.24, 99.50, 55.43, 49.51; **ESI-HRMS**: Calculated for  $\text{C}_{18}\text{H}_{15}\text{NNaO}_3^+$   $[\text{M}+\text{Na}]^+$  316.0944, found 316.0936.

### 2-(5-methyl-2-(5-phenylisoxazol-3-yl)phenyl)acetaldehyde (3j):

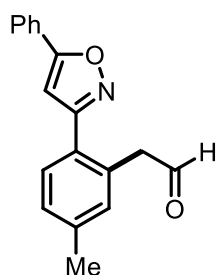

Yield: 73% (20 mg); Physical appearance: Yellow gel; TLC  $R_f$  0.3 (9:1, Petroleum ether: EtOAc);  $^1\text{H NMR}$  (500 MHz,  $\text{CDCl}_3$ ):  $\delta$  9.85 (t,  $J = 1.6$  Hz, 1H), 7.87 – 7.83 (m, 2H), 7.56 (d,  $J = 7.9$  Hz, 1H), 7.54 – 7.47 (m, 3H), 7.27 (d,  $J = 7.8$  Hz, 1H), 7.17 (s, 1H), 6.74 (s, 1H), 4.08 (d,  $J = 1.6$  Hz, 2H), 2.44 (s, 3H);  $^{13}\text{C NMR}$  (176 MHz,  $\text{CDCl}_3$ ):  $\delta$  199.85, 169.81, 162.99, 140.14, 132.86, 131.38, 130.33, 129.80, 129.05, 128.59, 127.26, 126.31, 125.87, 99.61, 49.28, 21.25; **ESI-HRMS**: Calculated for  $\text{C}_{18}\text{H}_{16}\text{NO}_3^+$   $[\text{M}+\text{H}]^+$  278.1176, found 278.1183.

### 2-(5-fluoro-2-(5-phenylisoxazol-3-yl)phenyl)acetaldehyde (3k):

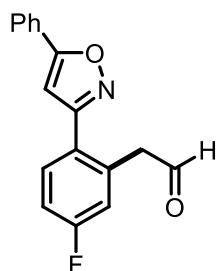

Yield: 55% (15 mg); Physical appearance: Yellow gel; TLC  $R_f$  0.3 (9:1, Petroleum ether: EtOAc);  $^1\text{H NMR}$  (500 MHz,  $\text{CDCl}_3$ ):  $\delta$  9.85 (t,  $J = 1.5$  Hz, 1H), 7.88 – 7.82 (m, 2H), 7.67 – 7.62 (m, 1H), 7.55 – 7.47 (m, 3H), 7.19 – 7.13 (m, 1H), 7.08 (dd,  $J = 9.2, 2.7$  Hz, 1H), 6.72 (s, 1H), 4.12 (d,  $J = 1.5$  Hz, 2H);  $^{13}\text{C NMR}$  (176 MHz,  $\text{CDCl}_3$ ):  $\delta$  198.60, 170.15, 163.19 (d,  $J = 250.7$  Hz), 162.23, 134.29 (d,  $J = 8.2$  Hz), 131.69 (d,  $J = 8.8$  Hz), 130.49, 129.10, 127.07, 125.89, 125.44, 125.42, 119.02 (d,  $J = 21.7$  Hz), 114.93 (d,  $J = 21.5$  Hz), 99.56, 49.12;  $^{19}\text{F NMR}$  (376 MHz,  $\text{CDCl}_3$ )  $\delta$  -110.88; **ESI-HRMS**: Calculated for  $\text{C}_{17}\text{H}_{13}\text{FNO}_2^+$   $[\text{M}+\text{H}]^+$  282.0925, found 282.0935.

### 2-(5-methoxy-2-(5-pentylisoxazol-3-yl)phenyl)acetaldehyde (3n):

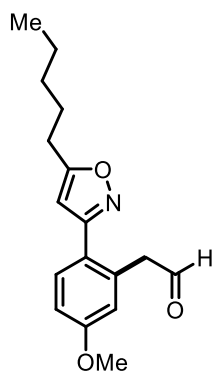

Yield: 76% (22 mg); Physical appearance: Pale-yellow gel; TLC  $R_f$  0.2 (9:1, Petroleum ether: EtOAc);  $^1\text{H NMR}$  (500 MHz,  $\text{CDCl}_3$ ):  $\delta$  9.79 (t,  $J = 1.6$  Hz, 1H), 7.51 (d,  $J = 8.5$  Hz, 1H), 6.94 (dd,  $J = 8.6, 2.7$  Hz, 1H), 6.83 (d,  $J = 2.6$  Hz, 1H), 6.16 (s, 1H), 4.05 (d,  $J = 1.5$  Hz, 2H), 3.87 (s, 3H), 2.79 (t,  $J = 7.7$  Hz, 2H), 1.81 – 1.72 (m, 2H), 1.44 – 1.37 (m, 4H), 0.94 (t,  $J = 7.0$  Hz, 3H);  $^{13}\text{C NMR}$  (176 MHz,  $\text{CDCl}_3$ ):  $\delta$  199.70, 173.58, 162.03, 160.38, 133.14, 131.16, 121.90, 117.38, 113.13, 100.75, 55.38, 49.46, 31.28, 27.19, 26.65, 22.31, 13.93; **ESI-HRMS**: Calculated for  $\text{C}_{17}\text{H}_{21}\text{NNaO}_3^+$   $[\text{M}+\text{Na}]^+$  310.1414, found 310.1417.

### 2-(2-(isoxazol-3-yl)-5-methoxyphenyl)acetaldehyde (3o):

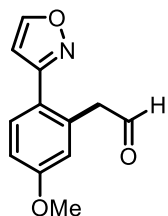

Yield: 70% (15 mg); Physical appearance: Yellow gel; TLC  $R_f$  0.2 (4:1, Petroleum ether: EtOAc);  $^1\text{H NMR}$  (500 MHz,  $\text{CDCl}_3$ ):  $\delta$  9.80 (t,  $J = 1.5$  Hz, 1H), 8.46 (d,  $J = 1.6$  Hz, 1H), 7.54 (d,  $J = 8.5$  Hz, 1H), 6.96 (dd,  $J = 8.6, 2.7$  Hz, 1H), 6.86 (d,  $J = 2.6$  Hz, 1H), 6.56 (d,  $J = 1.6$  Hz, 1H), 4.06 (d,  $J = 1.5$  Hz, 2H), 3.88 (s, 3H);  $^{13}\text{C NMR}$  (176 MHz,  $\text{CDCl}_3$ ):  $\delta$  199.49, 161.18, 160.59, 158.21, 133.29, 131.28, 121.24, 117.54, 113.22, 104.47, 55.41, 49.47; **ESI-HRMS**: Calculated for  $\text{C}_{12}\text{H}_{11}\text{NNaO}_3^+$   $[\text{M}+\text{Na}]^+$  240.0631, found 240.0638.

### 2-(2-(4-methyl-5-phenylisoxazol-3-yl)phenyl)acetaldehyde (3p):

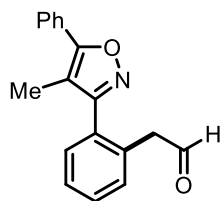

Yield: 61% (17 mg); Physical appearance: Yellow gel; TLC  $R_f$  0.2 (9:1, Petroleum ether: EtOAc);  $^1\text{H NMR}$  (500 MHz,  $\text{CDCl}_3$ ):  $\delta$  9.75 (t,  $J = 1.8$  Hz, 1H), 7.84 – 7.80 (m, 2H), 7.57 – 7.44 (m, 6H), 7.39 (d,  $J = 7.8$  Hz, 1H), 3.85 (d,  $J = 1.7$  Hz, 2H), 2.18 (s, 3H);  $^{13}\text{C NMR}$  (176 MHz,  $\text{CDCl}_3$ ):  $\delta$  199.18, 165.39, 163.70, 132.03, 131.32, 130.43, 129.84, 129.66, 129.51, 128.92, 128.33, 127.62, 126.72, 109.63, 48.34, 8.89; **ESI–HRMS**: Calculated for  $\text{C}_{18}\text{H}_{16}\text{NO}_2^+$   $[\text{M}+\text{H}]^+$  278.1176, found 278.1154.

#### 3.6.1.2 General procedure for the Ru-catalyzed synthesis of anthranils:

In a pressure tube equipped with a stir bar, the isoxazole (1.0 equiv, 0.1 mmol) was dissolved in HFIP (1.0 mL). The reaction mixture was degassed with nitrogen for 10 min followed by the addition of the vinylene carbonate (2.0 equiv, 0.20 mmol),  $[\text{RuCl}_2(p\text{-cym})]_2$  (5 mol%, 0.005 mmol), and  $\text{AgSbF}_6$  (0.50 equiv, 0.05 mmol). The tube was fitted with a Teflon screw cap under a nitrogen flow, and the reaction mixture was heated to 90 °C and allowed to stir for 24–26 h. Upon cooling to room temperature, the reaction mixture was diluted with ethyl acetate and filtered through a pad of Celite. The filtrate was washed with a saturated solution of  $\text{NaHCO}_3$  and brine. The organic extract was dried over anhydrous  $\text{Na}_2\text{SO}_4$ , filtered, and concentrated under reduced pressure. The crude product was purified by a silica gel flash column chromatography to result in the desired product.

### 9-methyl-3-phenylnaphtho[1,2-c]isoxazole (4a):

Yield: 68% (18 mg); Physical appearance: Colorless solid; M.p. 113–115 °C; TLC  $R_f$  0.5 (19:1, Petroleum ether: EtOAc);  $^1\text{H NMR}$  (500 MHz,  $\text{CDCl}_3$ ):  $\delta$  8.06 (d,  $J = 7.2$  Hz, 2H), 7.67 – 7.47 (m, 7H), 7.36 (d,  $J = 9.2$  Hz, 1H), 3.08 (s, 3H);  $^{13}\text{C NMR}$  (176 MHz,  $\text{CDCl}_3$ ):  $\delta$  162.29, 158.09, 138.02, 134.78, 130.17, 130.03, 129.24, 128.94, 128.51, 128.25, 126.76, 126.34, 121.95, 116.99, 113.13, 24.11; **ESI–HRMS**: Calculated for  $\text{C}_{18}\text{H}_{14}\text{NO}^+$   $[\text{M}+\text{H}]^+$  260.1070, found 260.1059.

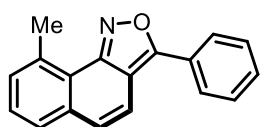

### 9-fluoro-3-phenylnaphtho[1,2-c]isoxazole (4b):

Yield: 62% (16 mg); Physical appearance: Colorless solid; M.p. 124–126 °C; TLC  $R_f$  0.4 (9:1, Petroleum ether: EtOAc);  $^1\text{H NMR}$  (500 MHz,  $\text{CDCl}_3$ ):  $\delta$  8.08 – 8.03 (m, 2H), 7.71 (d,  $J = 9.2$  Hz, 1H), 7.67 – 7.53 (m, 5H), 7.43 – 7.35 (m, 2H);  $^{13}\text{C NMR}$  (176 MHz,  $\text{CDCl}_3$ ):  $\delta$  163.30, 160.00 (d,  $J =$

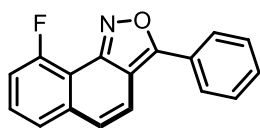

257.7 Hz), 154.28 (d,  $J = 5.1$  Hz), 135.97 (d,  $J = 4.3$  Hz), 130.39, 130.23 (d,  $J = 8.8$  Hz), 129.30, 128.14, 126.89, 126.58 (d,  $J = 2.9$  Hz), 124.05 (d,  $J = 3.7$  Hz), 118.55, 114.45 (d,  $J = 20.1$  Hz), 112.44, 111.56 (d,  $J = 15.2$  Hz); **ESI–HRMS**: Calculated for  $C_{17}H_{10}FNO^+$   $[M+H]^+$  264.0819, found 264.0810.

#### 9-chloro-3-phenylnaphtho[1,2-c]isoxazole (4c):

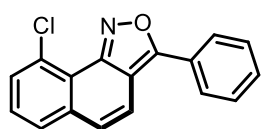

Yield: 65% (18 mg); Physical appearance: Colorless solid; M.p. 153–155 °C; TLC  $R_f$  0.4 (19:1, Petroleum ether: EtOAc);  **$^1H$  NMR** (500 MHz,  $CDCl_3$ ):  $\delta$  8.07 – 8.03 (m, 2H), 7.76 – 7.68 (m, 3H), 7.64 – 7.53 (m, 4H), 7.36 (d,  $J = 9.2$  Hz, 1H);  **$^{13}C$  NMR** (176 MHz,  $CDCl_3$ ):  $\delta$  163.24, 156.03, 136.20, 132.65, 130.37, 129.98, 129.50, 129.32, 128.16, 127.26, 127.24, 126.89, 121.15, 118.41, 113.26; **ESI–HRMS**: Calculated for  $C_{17}H_{11}ClNO^+$   $[M+H]^+$  280.0524, found 280.0527.

#### 9-bromo-3-phenylnaphtho[1,2-c]isoxazole (4d):

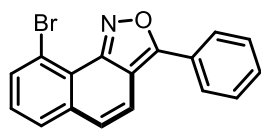

Yield: 61% (20 mg); Physical appearance: Colorless solid; M.p. 154–156 °C; TLC  $R_f$  0.4 (19:1, Petroleum ether: EtOAc);  **$^1H$  NMR** (500 MHz,  $CDCl_3$ ):  $\delta$  8.04 (d,  $J = 7.1$  Hz, 2H), 7.95 (d,  $J = 7.8$  Hz, 1H), 7.75 (d,  $J = 7.7$  Hz, 1H), 7.70 (d,  $J = 9.1$  Hz, 1H), 7.64 – 7.58 (m, 2H), 7.57 – 7.52 (m, 1H), 7.49 (t,  $J = 7.8$  Hz, 1H), 7.34 (d,  $J = 9.2$  Hz, 1H);  **$^{13}C$  NMR** (176 MHz,  $CDCl_3$ ):  $\delta$  163.32, 156.16, 136.49, 133.77, 130.36, 129.69, 129.32, 128.15, 127.93, 127.40, 126.86, 122.78, 120.53, 118.34, 113.28; **ESI–HRMS**: Calculated for  $C_{17}H_{11}BrNO^+$   $[M+H]^+$  324.0019, found 324.0015.

#### 9-nitro-3-phenylnaphtho[1,2-c]isoxazole (4e):

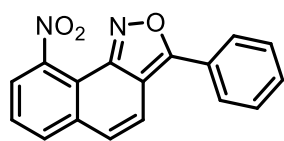

Yield: 54% (15 mg); Physical appearance: Yellow solid; M.p. 203–205 °C; TLC  $R_f$  0.3 (19:1, Petroleum ether: EtOAc);  **$^1H$  NMR** (500 MHz,  $CDCl_3$ ):  $\delta$  8.02 (d,  $J = 7.4$  Hz, 2H), 7.95 (dd,  $J = 7.4, 1.7$  Hz, 1H), 7.82 – 7.70 (m, 3H), 7.64 – 7.53 (m, 3H), 7.41 (d,  $J = 9.3$  Hz, 1H);  **$^{13}C$  NMR** (176 MHz,  $CDCl_3$ )  $\delta$  164.37, 152.73, 147.81, 135.21, 131.08, 130.75, 129.41, 127.70, 126.89, 126.12, 121.57, 119.78, 113.24, 112.64; **ESI–HRMS**: Calculated for  $C_{17}H_{11}N_2O_3^+$   $[M+H]^+$  291.0764, found 291.0793.

### 9-methoxy-3-phenylnaphtho[1,2-c]isoxazole (4f):

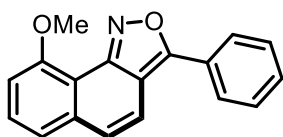

Yield: 63% (17 mg); Physical appearance: Colorless solid; M.p. 140–142 °C; TLC  $R_f$  0.3 (19:1, Petroleum ether: EtOAc);  $^1\text{H NMR}$  (500 MHz,  $\text{CDCl}_3$ ):  $\delta$  8.05 (d,  $J = 7.3$  Hz, 2H), 7.68 (d,  $J = 9.2$  Hz, 1H), 7.65–7.57 (m, 3H), 7.53 (t,  $J = 7.4$  Hz, 1H), 7.39 (d,  $J = 7.8$  Hz, 1H), 7.34 (d,  $J = 9.2$  Hz, 1H), 7.18 (d,  $J = 8.2$  Hz, 1H), 4.20 (s, 3H);  $^{13}\text{C NMR}$  (176 MHz,  $\text{CDCl}_3$ ):  $\delta$  162.49, 157.80, 155.78, 135.88, 130.07, 130.07, 129.21, 128.51, 127.37, 126.85, 120.77, 117.98, 112.94, 112.48, 109.25, 56.17; **ESI–HRMS**: Calculated for  $\text{C}_{18}\text{H}_{14}\text{NO}_2^+$   $[\text{M}+\text{H}]^+$  276.1019, found 276.1026.

### 4) Procedure for the TsOH-mediated cyclization of formylmethyl isoxazoles.

In a pressure tube equipped with a stir bar, the crude formylmethyl isoxazole (**3c**, **3d**) were dissolved in DCE (1.0 mL) followed by the addition of *p*-TSA (1.0 equiv). The tube was fitted with a Teflon screw cap under an argon flow, and the reaction mixture was heated to 100 °C and allowed to stir for 12 h. Upon cooling to room temperature, the reaction mixture was diluted with ethyl acetate and filtered through a pad of Celite. The filtrate was washed with a saturated solution of  $\text{NaHCO}_3$  and brine. The organic extract was dried over anhydrous  $\text{Na}_2\text{SO}_4$ , filtered, and concentrated under reduced pressure. The crude product was purified by a silica gel flash column chromatography to result in the desired product.

### 5) References

- (1) W. L. F. Armarego, *Purification of Laboratory Chemicals*; 8<sup>th</sup> Edition; Butterworth-Heinemann, **2017**.
- (2) P. Kumar, M. Kapur, *Org. Lett.* **2019**, *21*, 2134.
- (3) P. Kumar, S. K. Keshri, M. Kapur, *Org. Biomol. Chem.* **2021**, *19*, 3428.
- (4) M. S. Ledovskaya, K. S. Rodygin and V. P. Ananikov, *Org. Chem. Front.* **2018**, *5*, 226.
- (5) P. Kumar, M. Kapur, *Org. Lett.* **2021**, *23*, 5855.

## 6) Representative Spectra

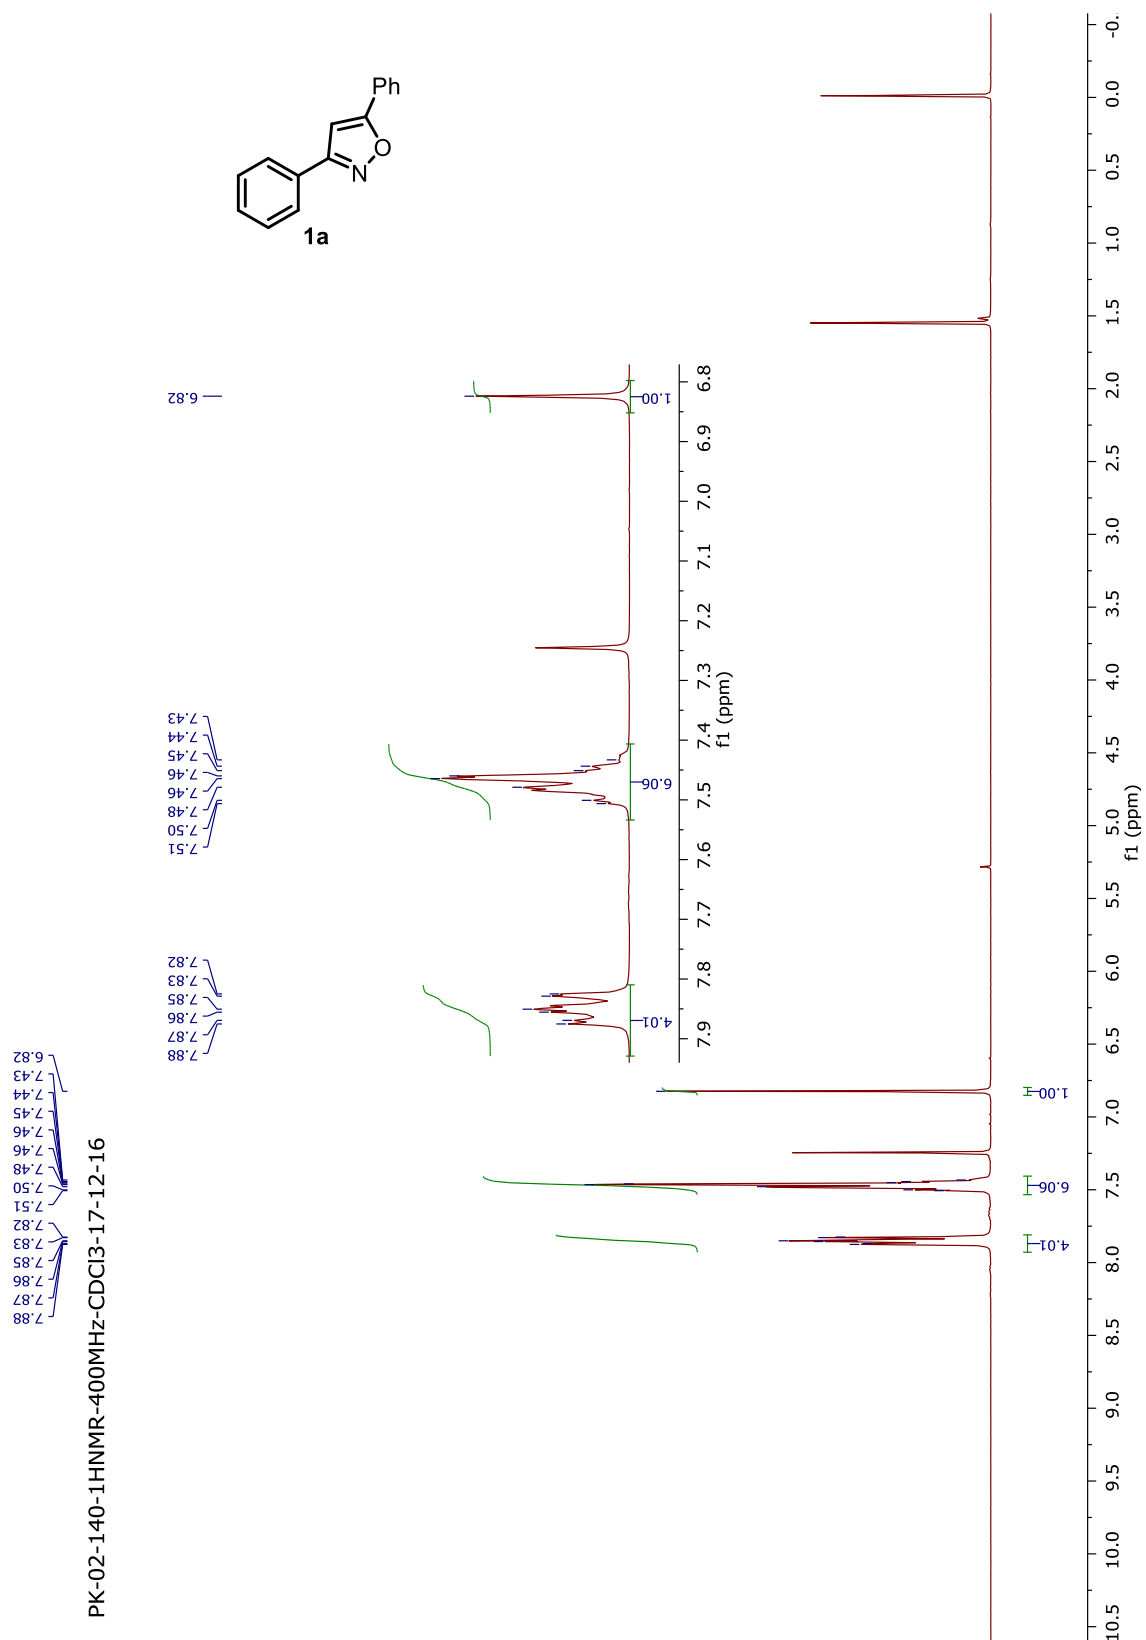



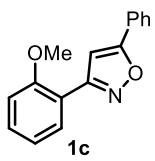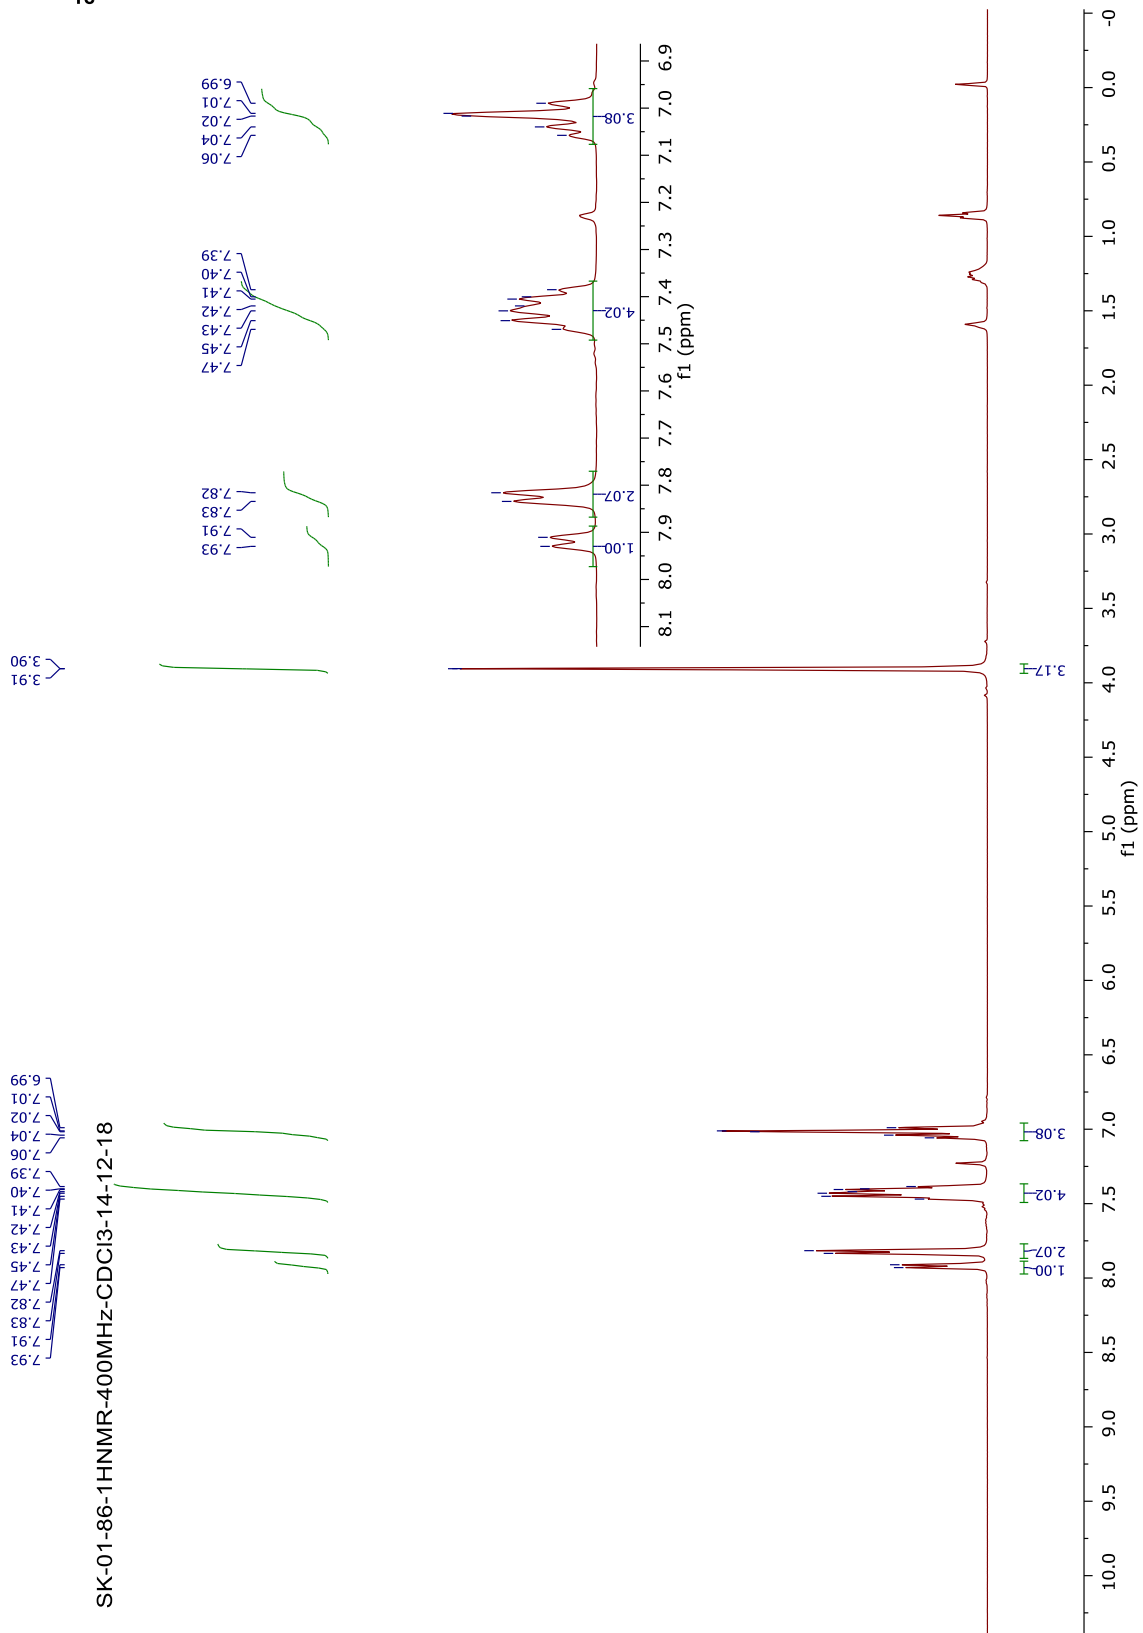



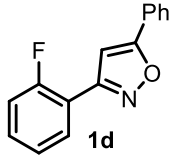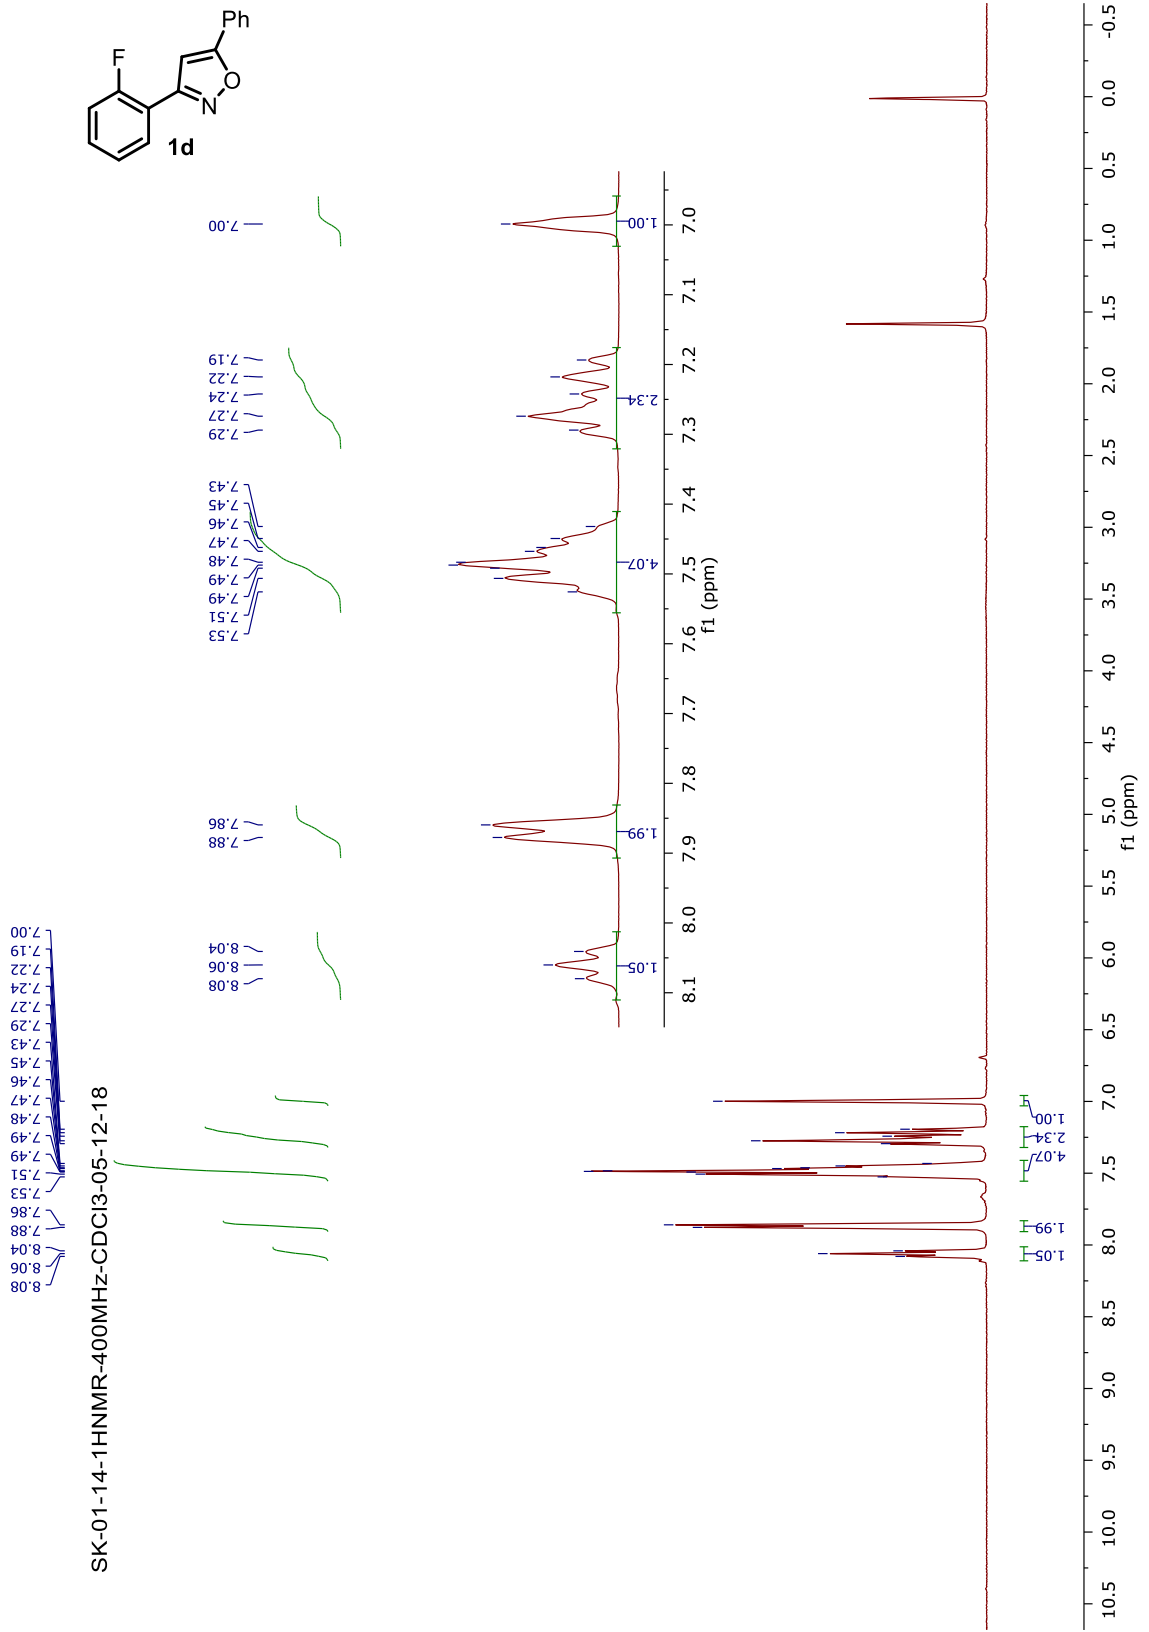



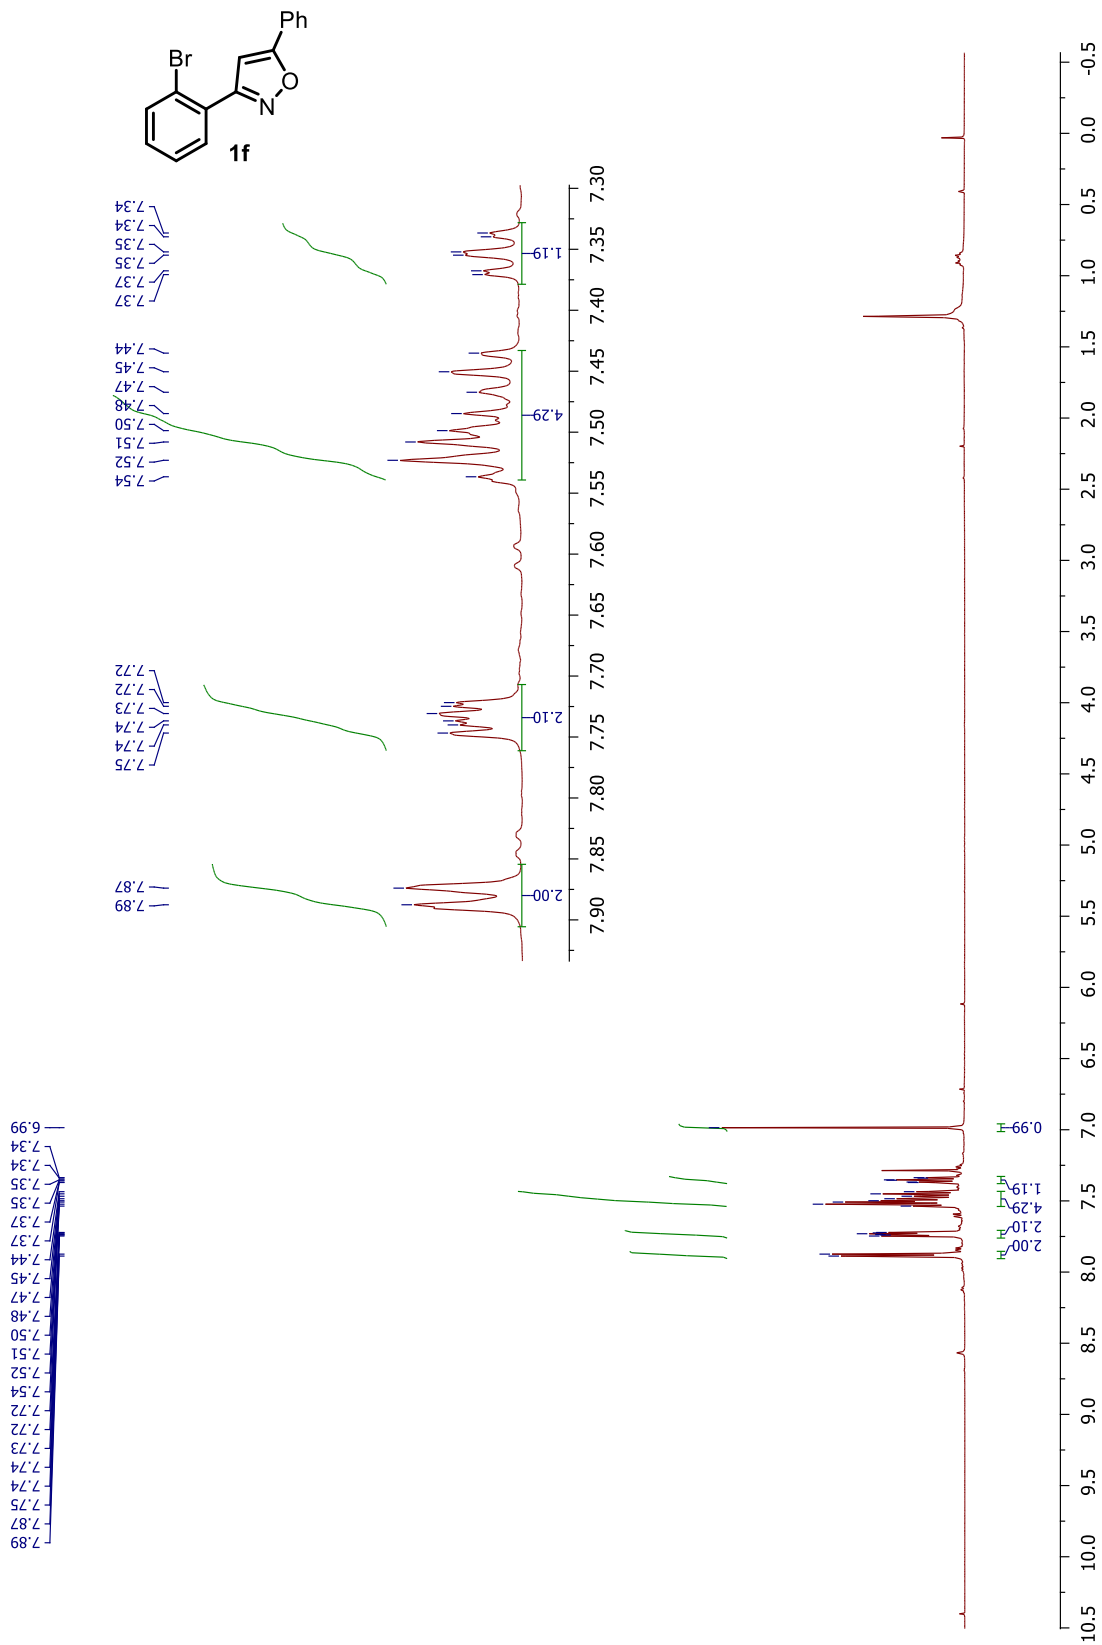

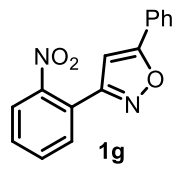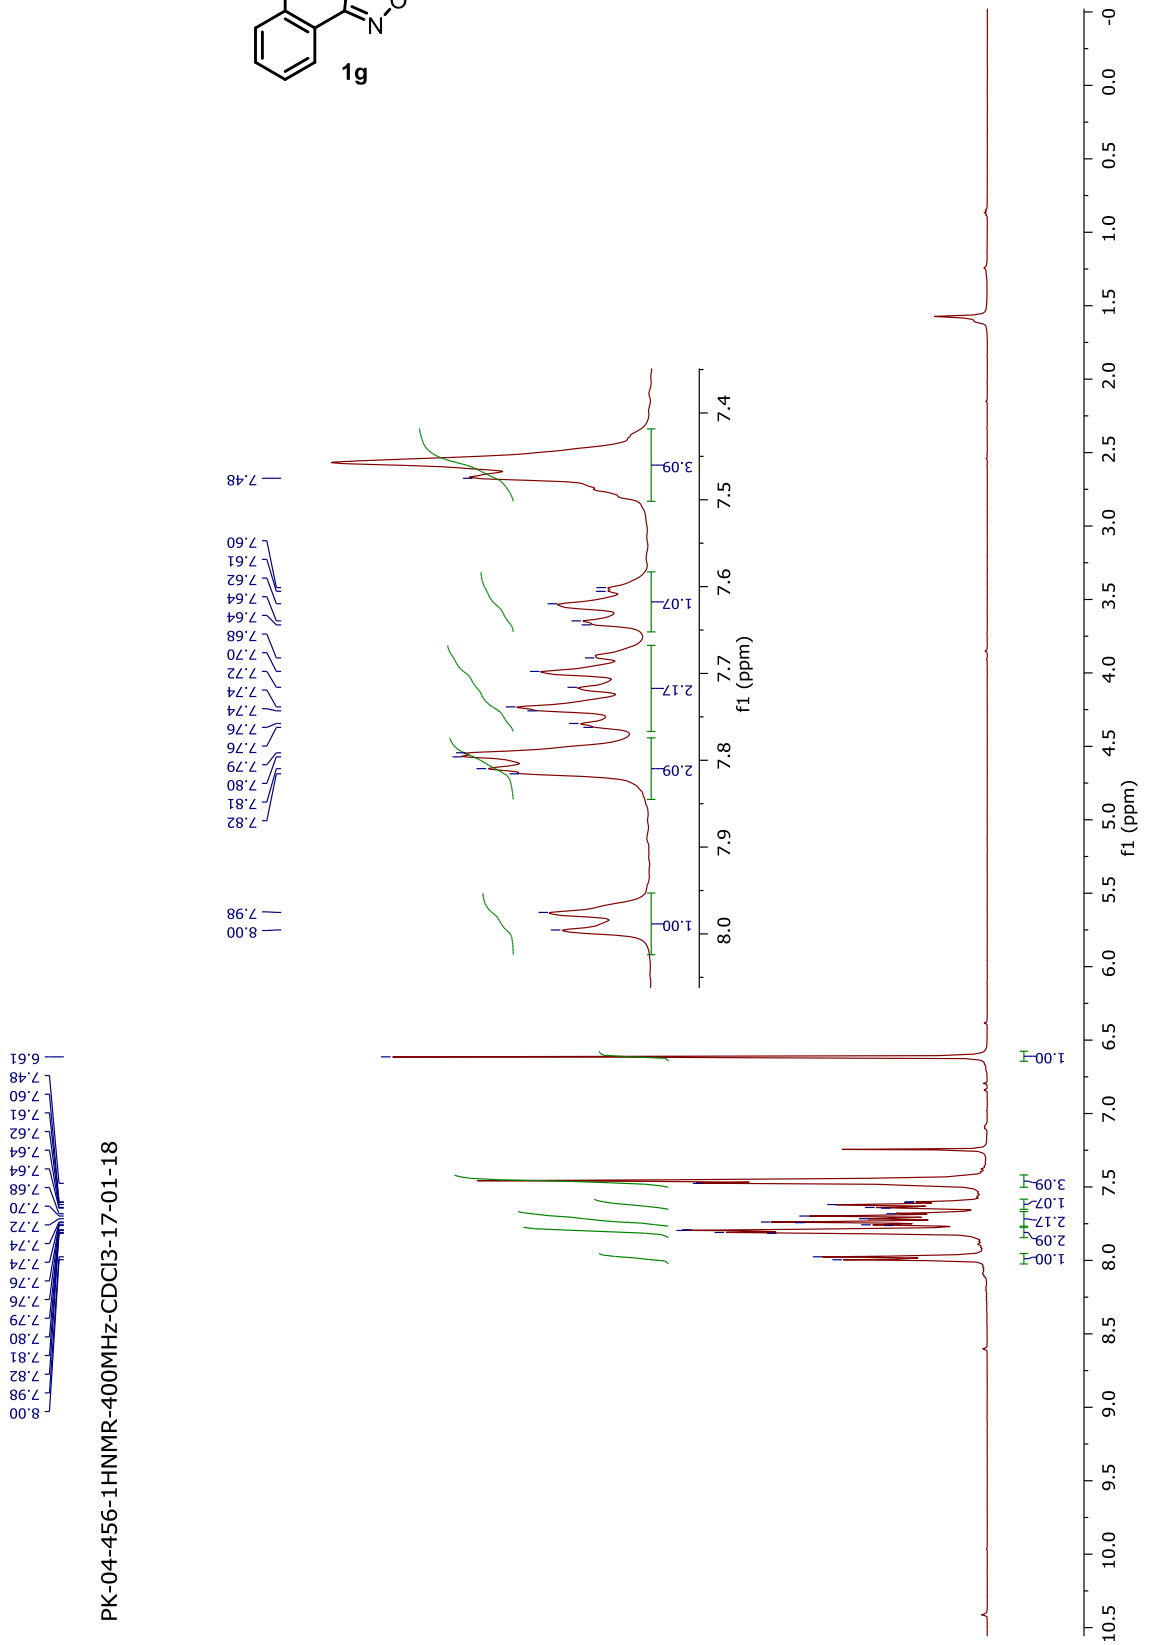

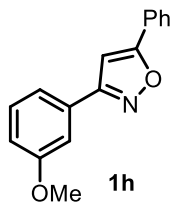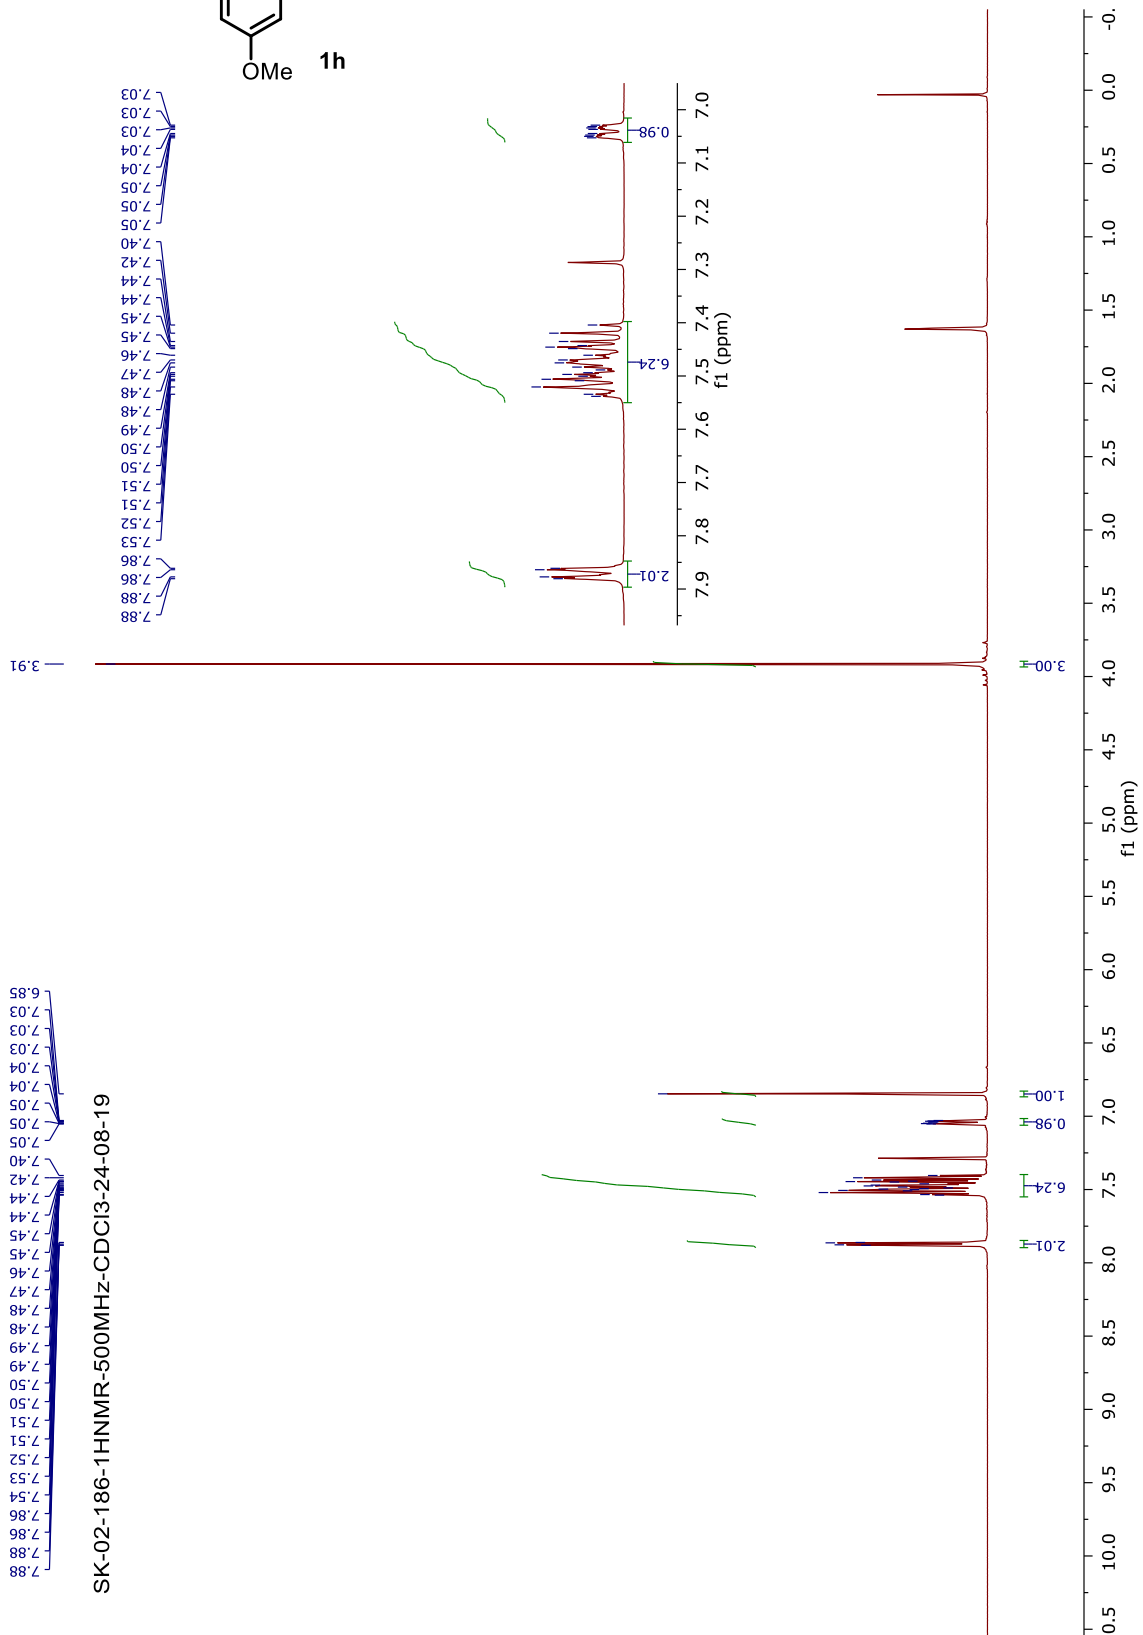

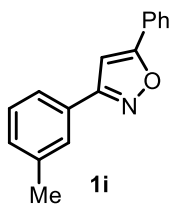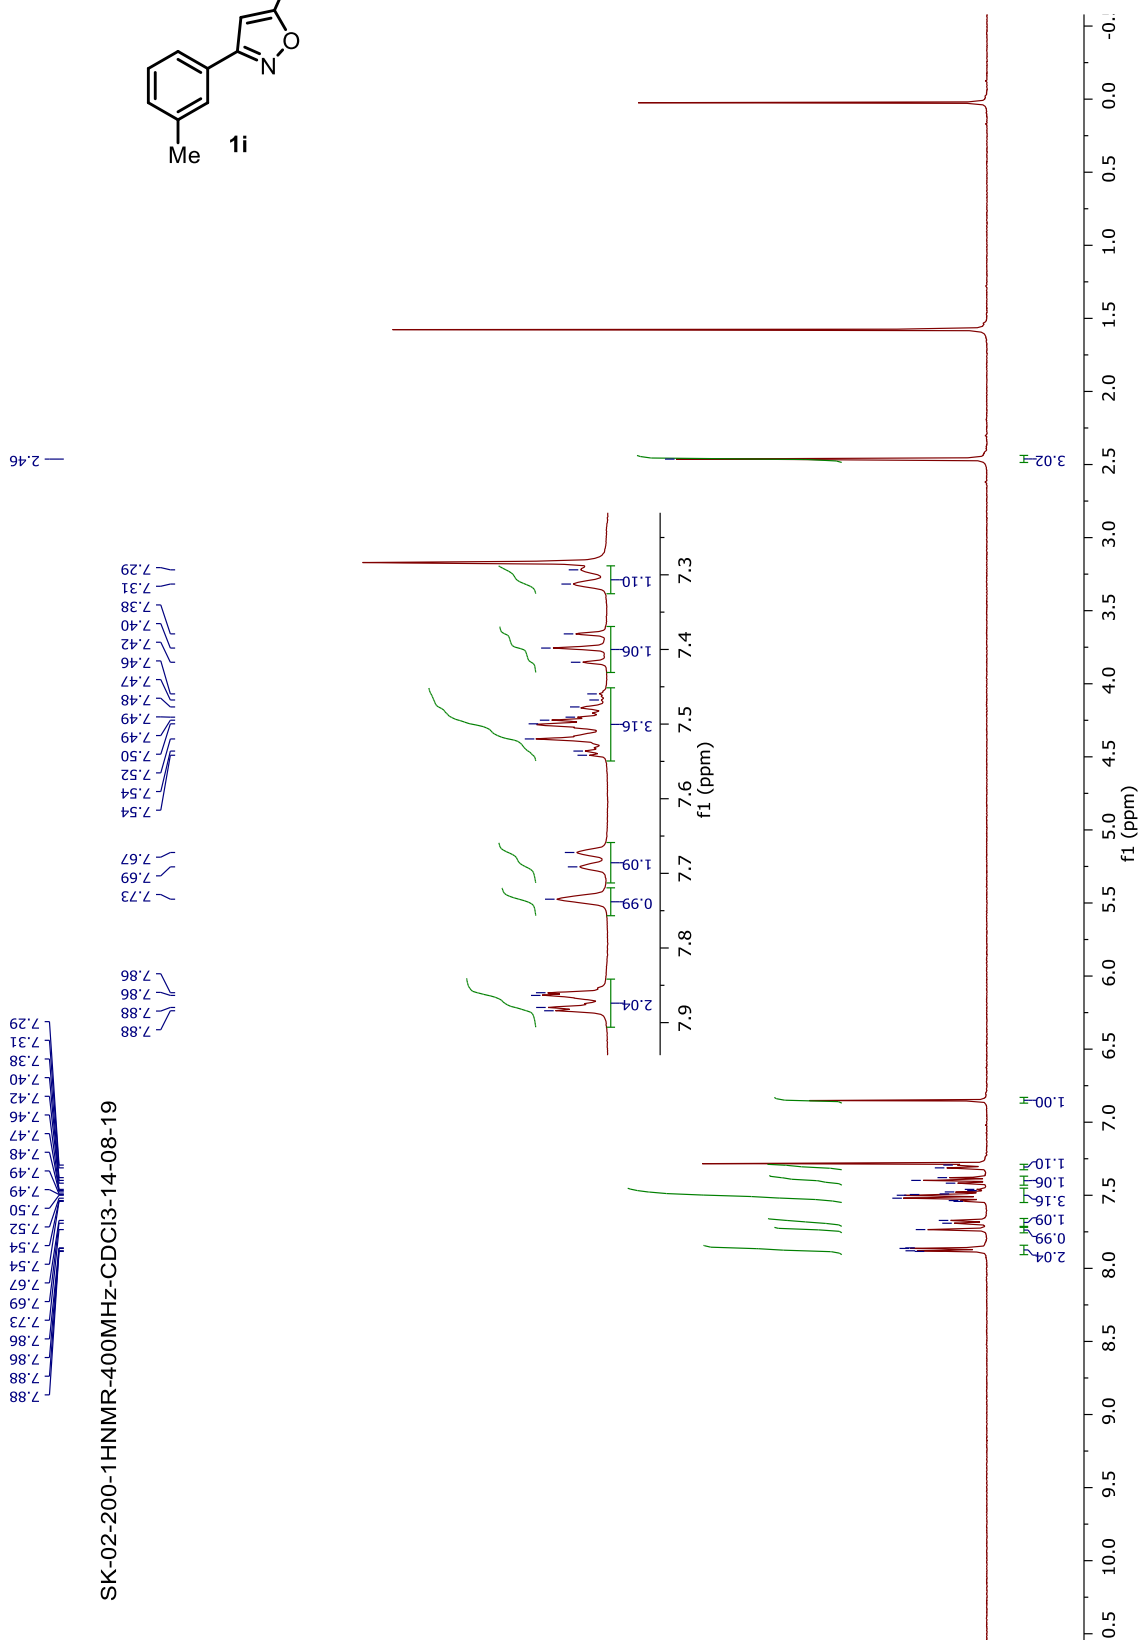

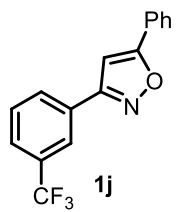

SK-02-297-1HNMR-400MHz-CDCl3-08-06-19

8.15  
8.11  
8.10  
7.89  
7.89  
7.88  
7.87  
7.76  
7.75  
7.66  
7.65  
7.63  
7.55  
7.55  
7.55  
7.54  
7.52  
7.52  
7.51  
7.51  
7.50  
7.49  
7.49  
6.90

8.15  
8.11  
8.10  
7.89  
7.88  
7.87  
7.76  
7.75  
7.66  
7.65  
7.63  
7.55  
7.55  
7.55  
7.54  
7.52  
7.52  
7.51  
7.51  
7.50  
7.49  
7.49  
7.49

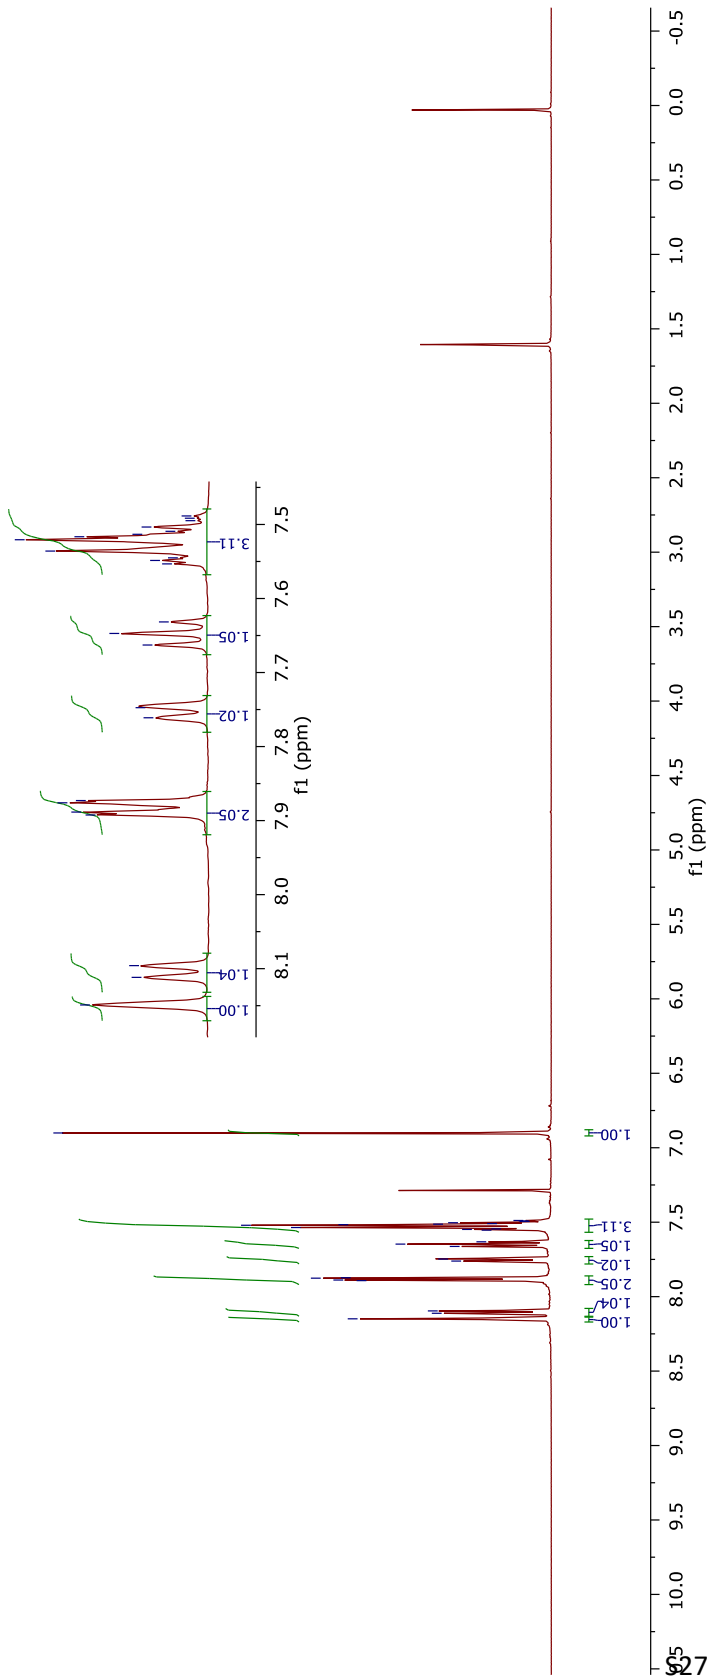

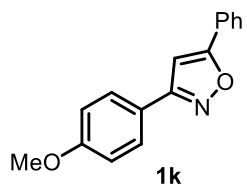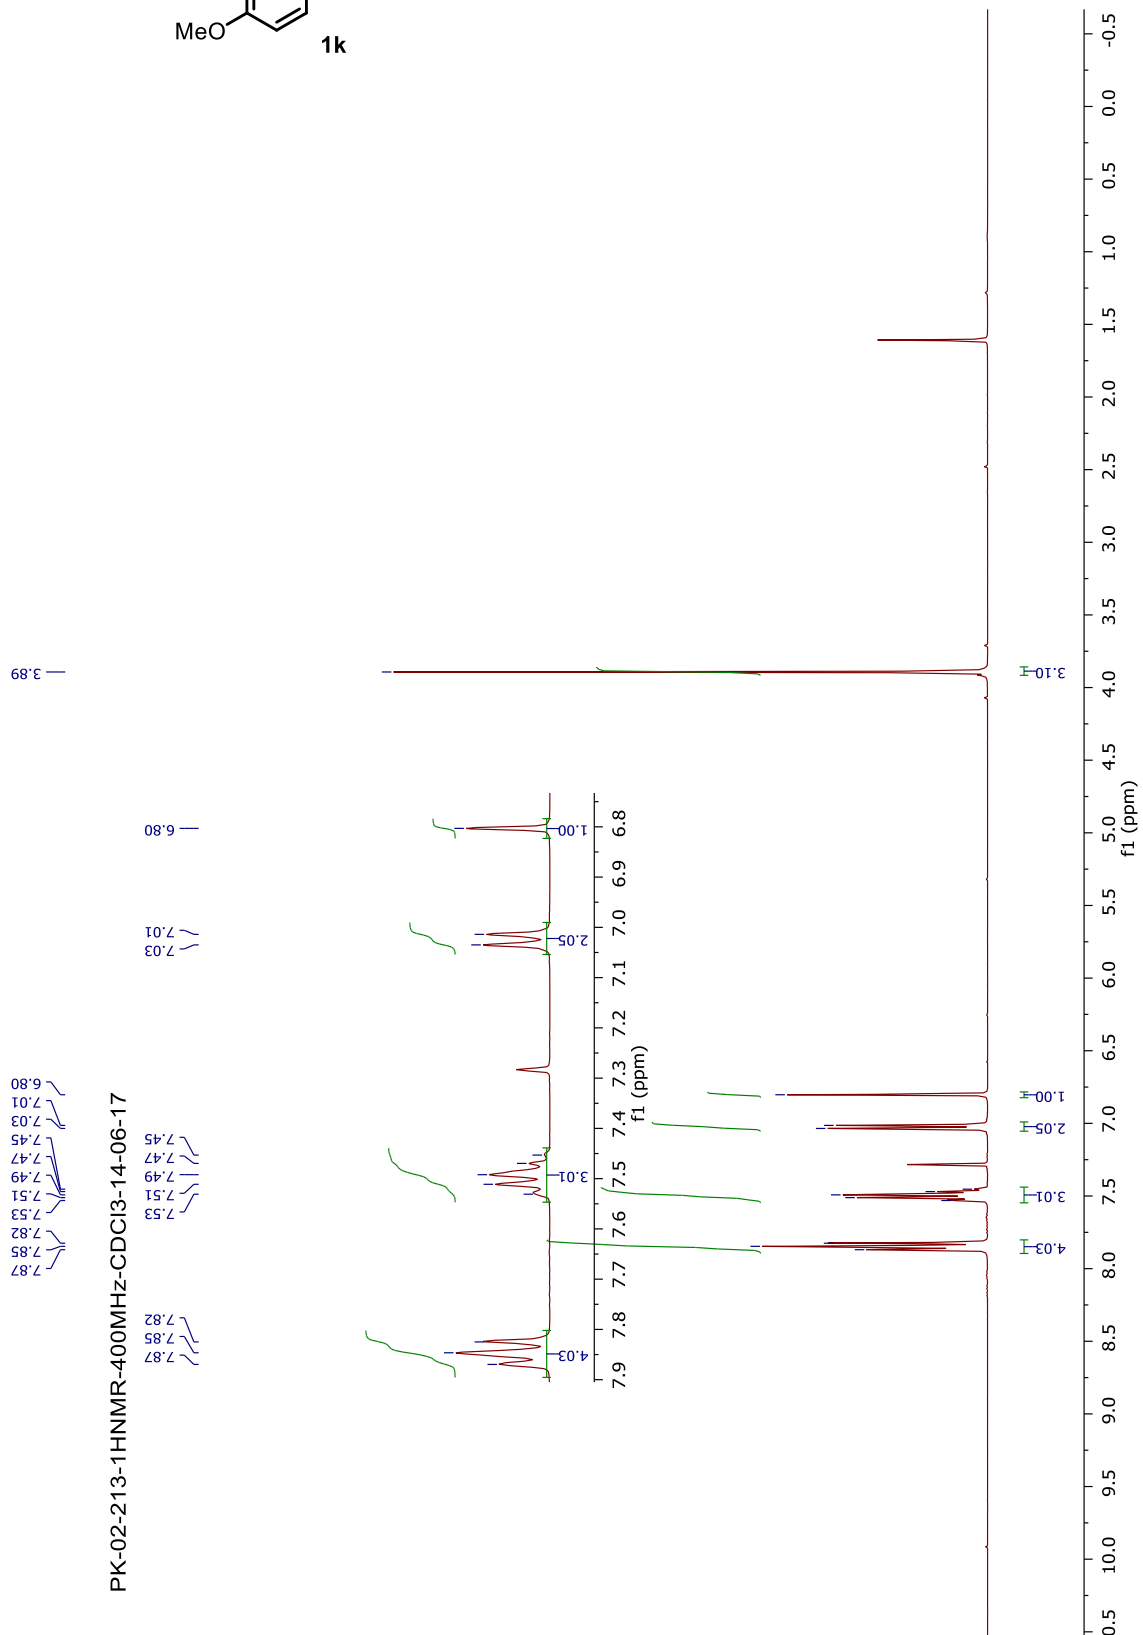



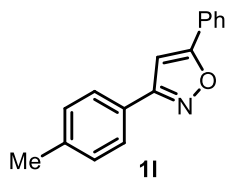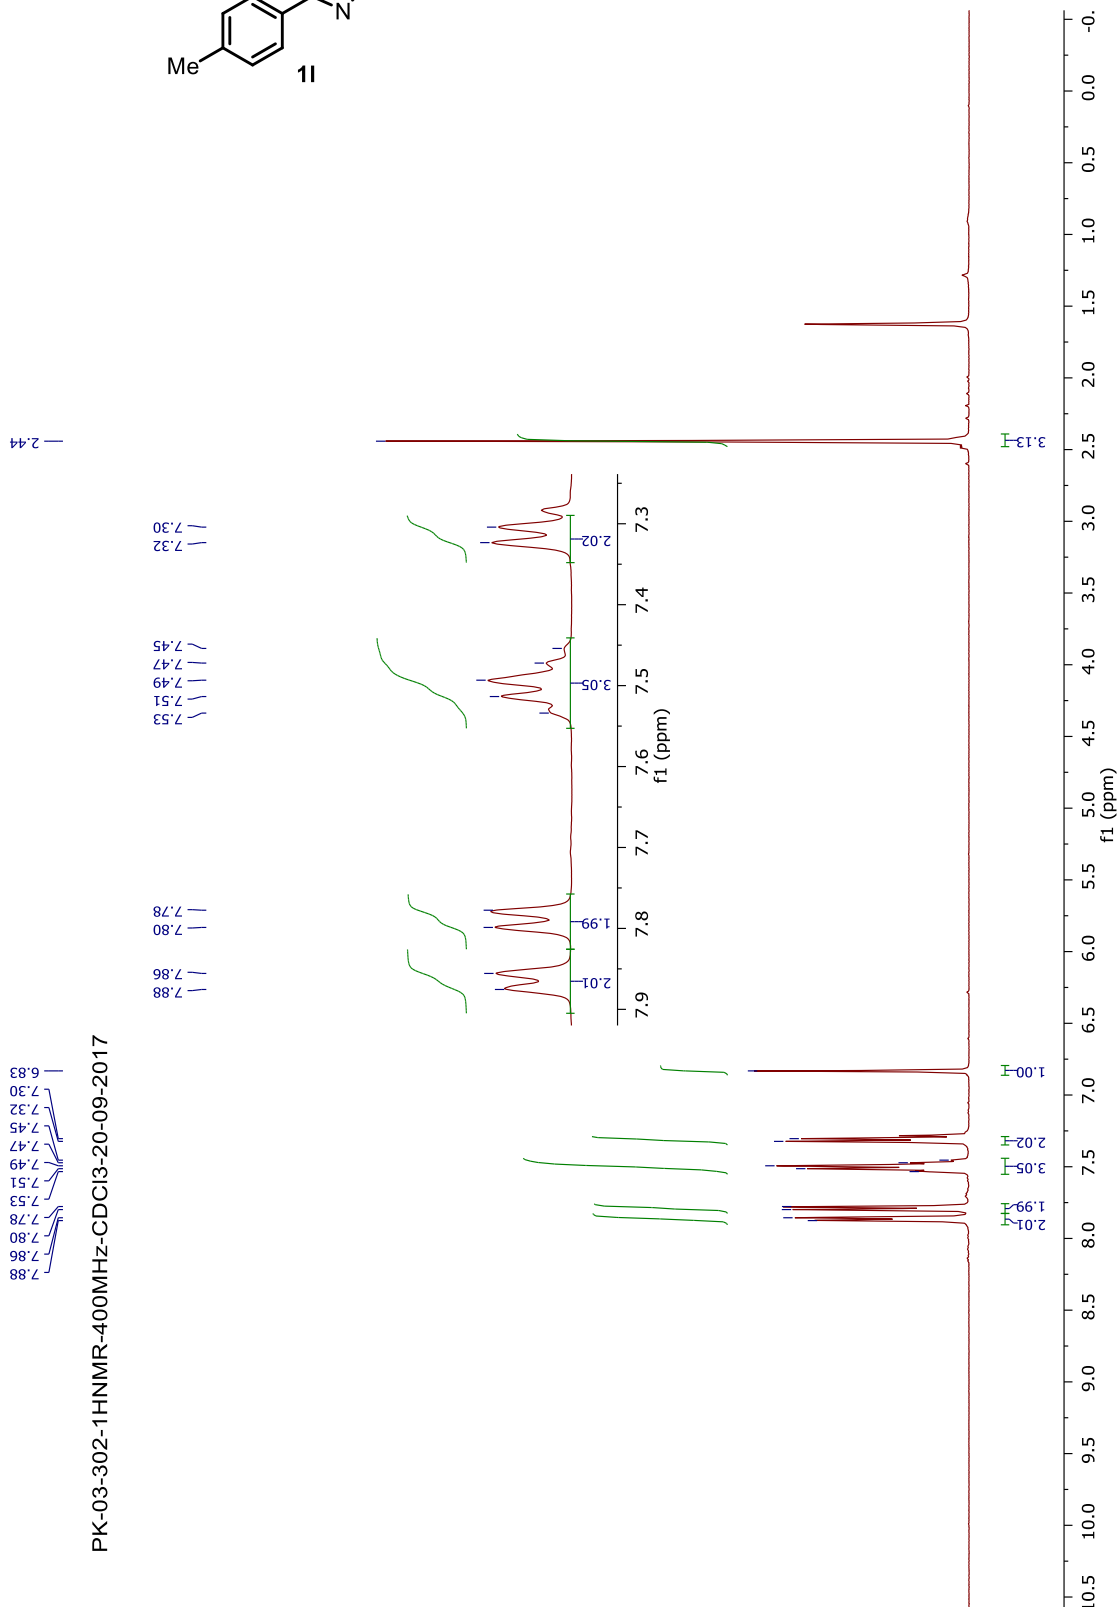

PK-03-302-1HNMR-400MHZ-CDCl3-20-09-2017

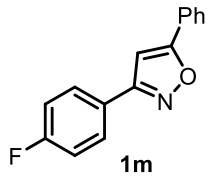

PK-03-207-1HNMR-500MHZ-CDCl3-24-08-19

6.82  
7.18  
7.20  
7.22  
7.49  
7.50  
7.50  
7.52  
7.54  
7.54  
7.54  
7.85  
7.85  
7.87  
7.87  
7.88  
7.89  
7.90

7.18  
7.20  
7.22  
7.49  
7.50  
7.50  
7.52  
7.54  
7.85  
7.87  
7.87  
7.88  
7.89  
7.90

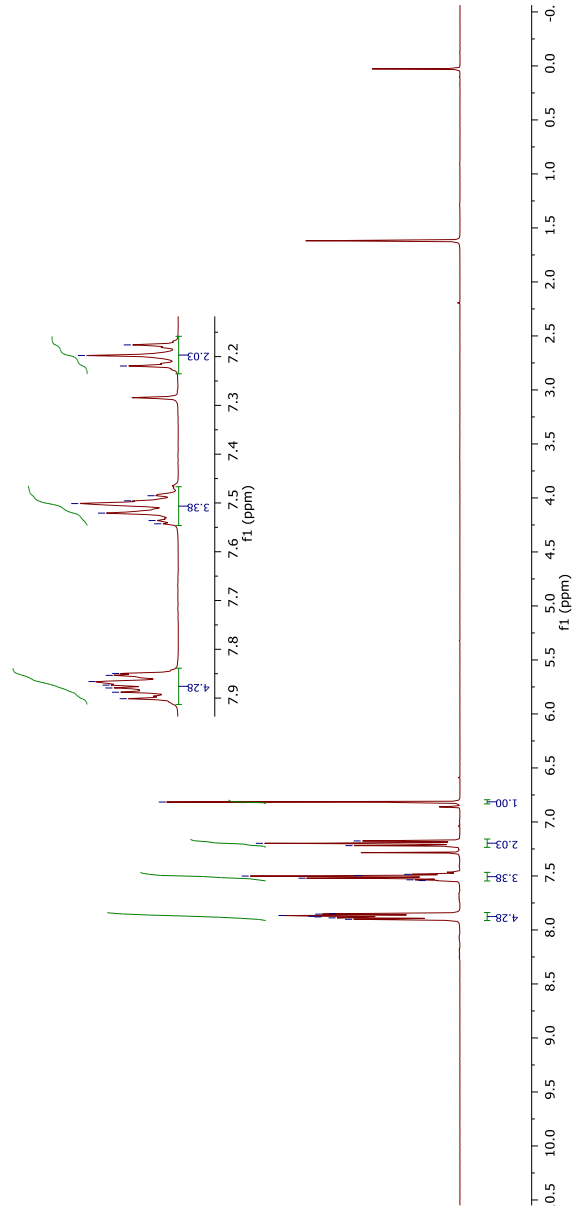

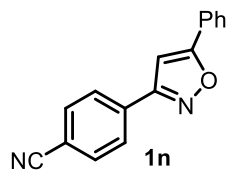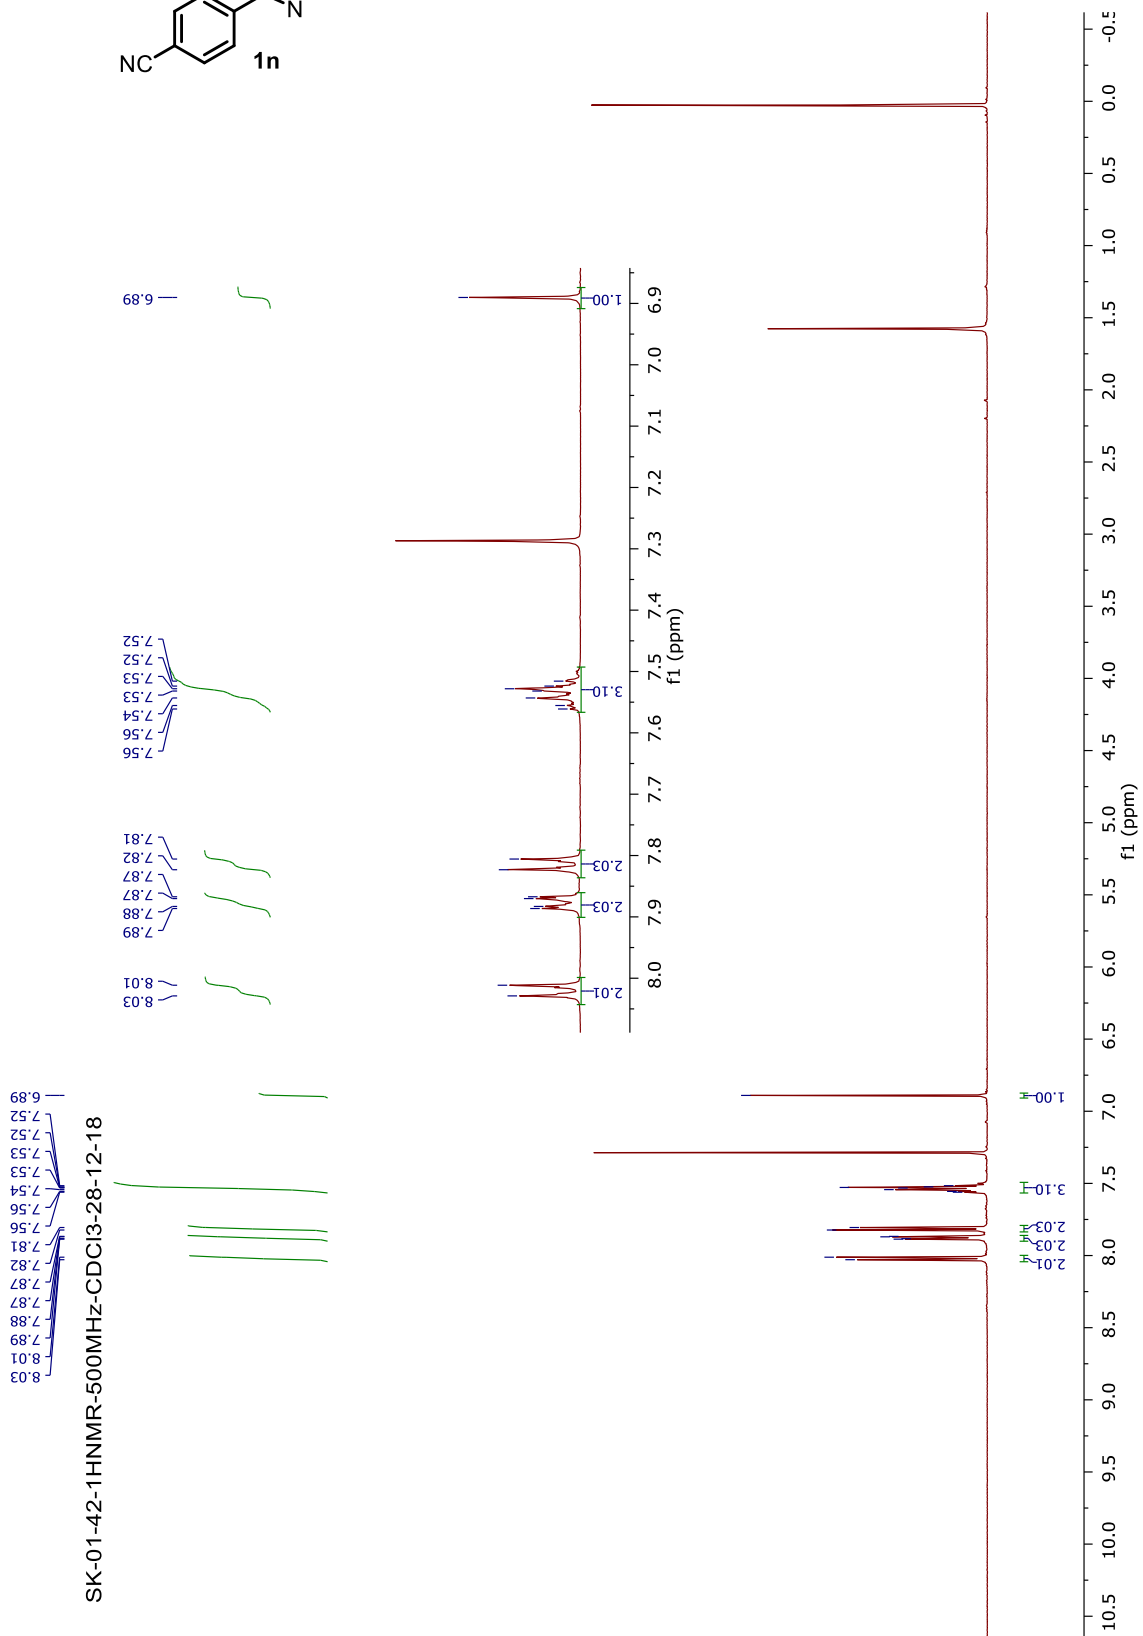

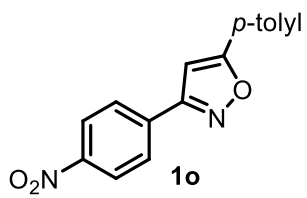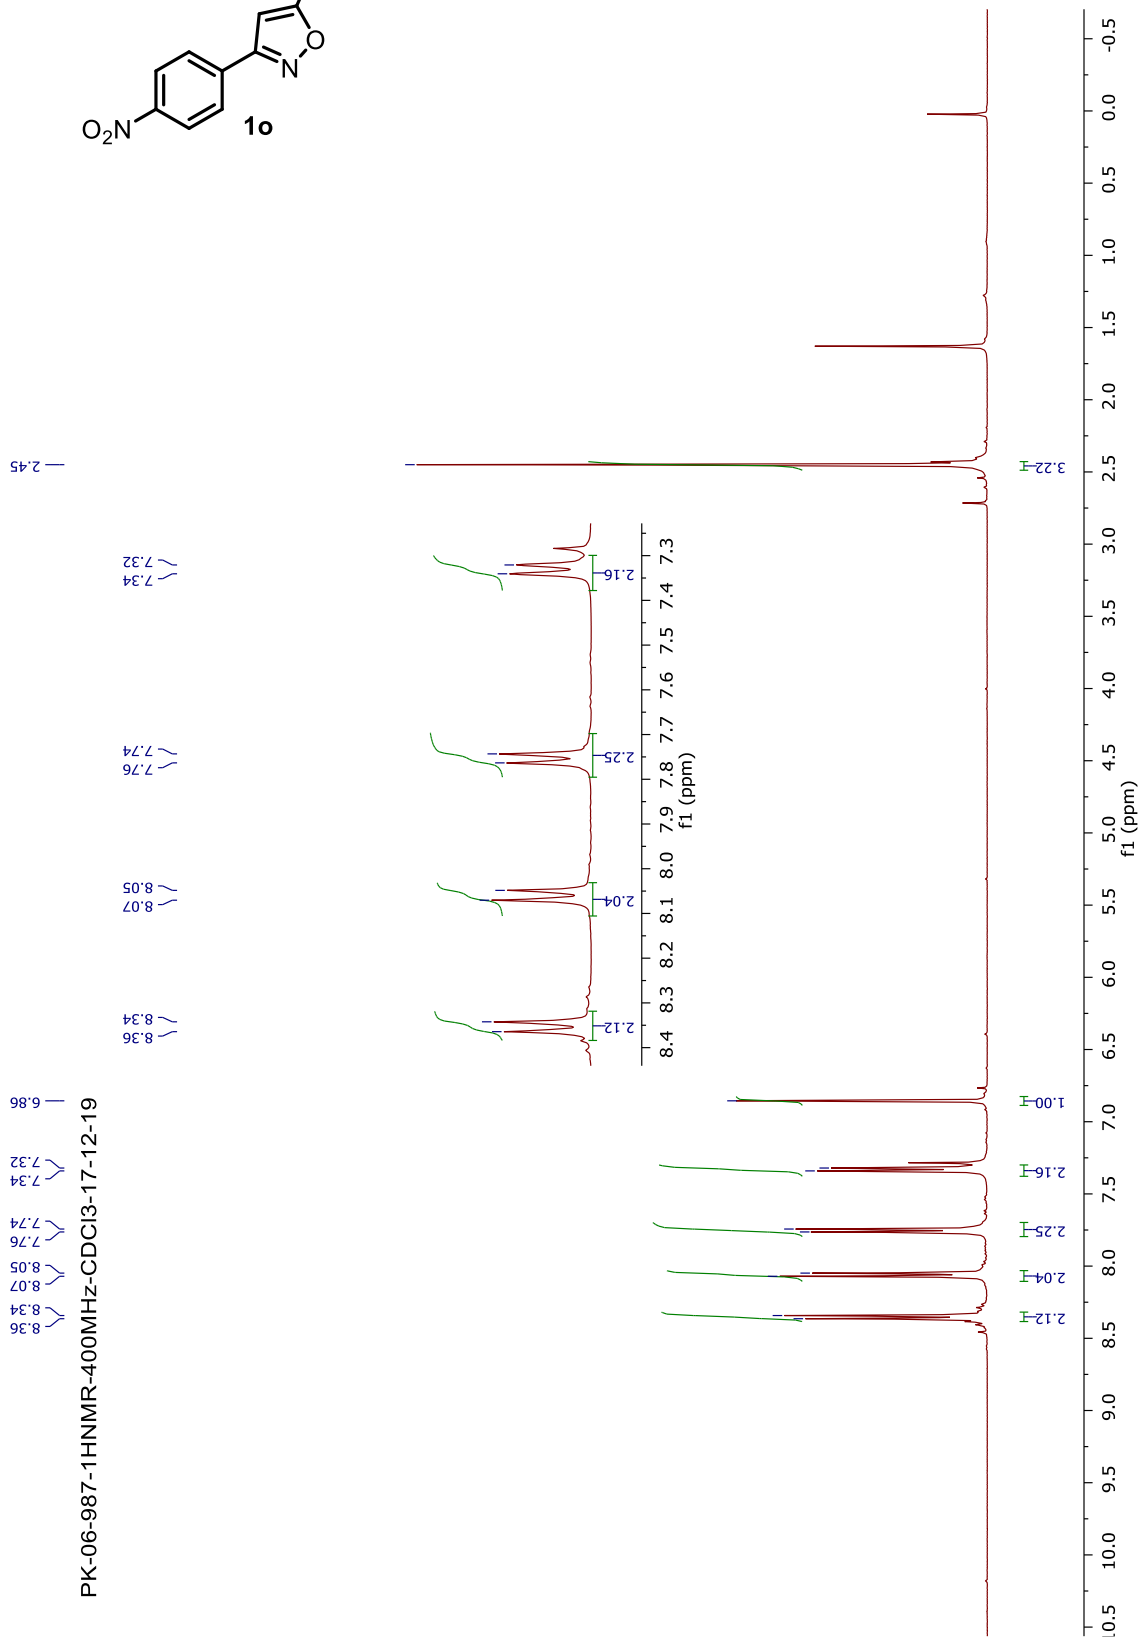

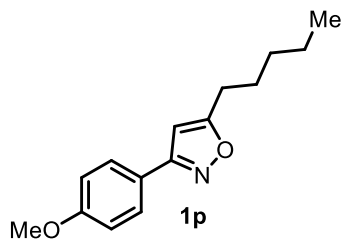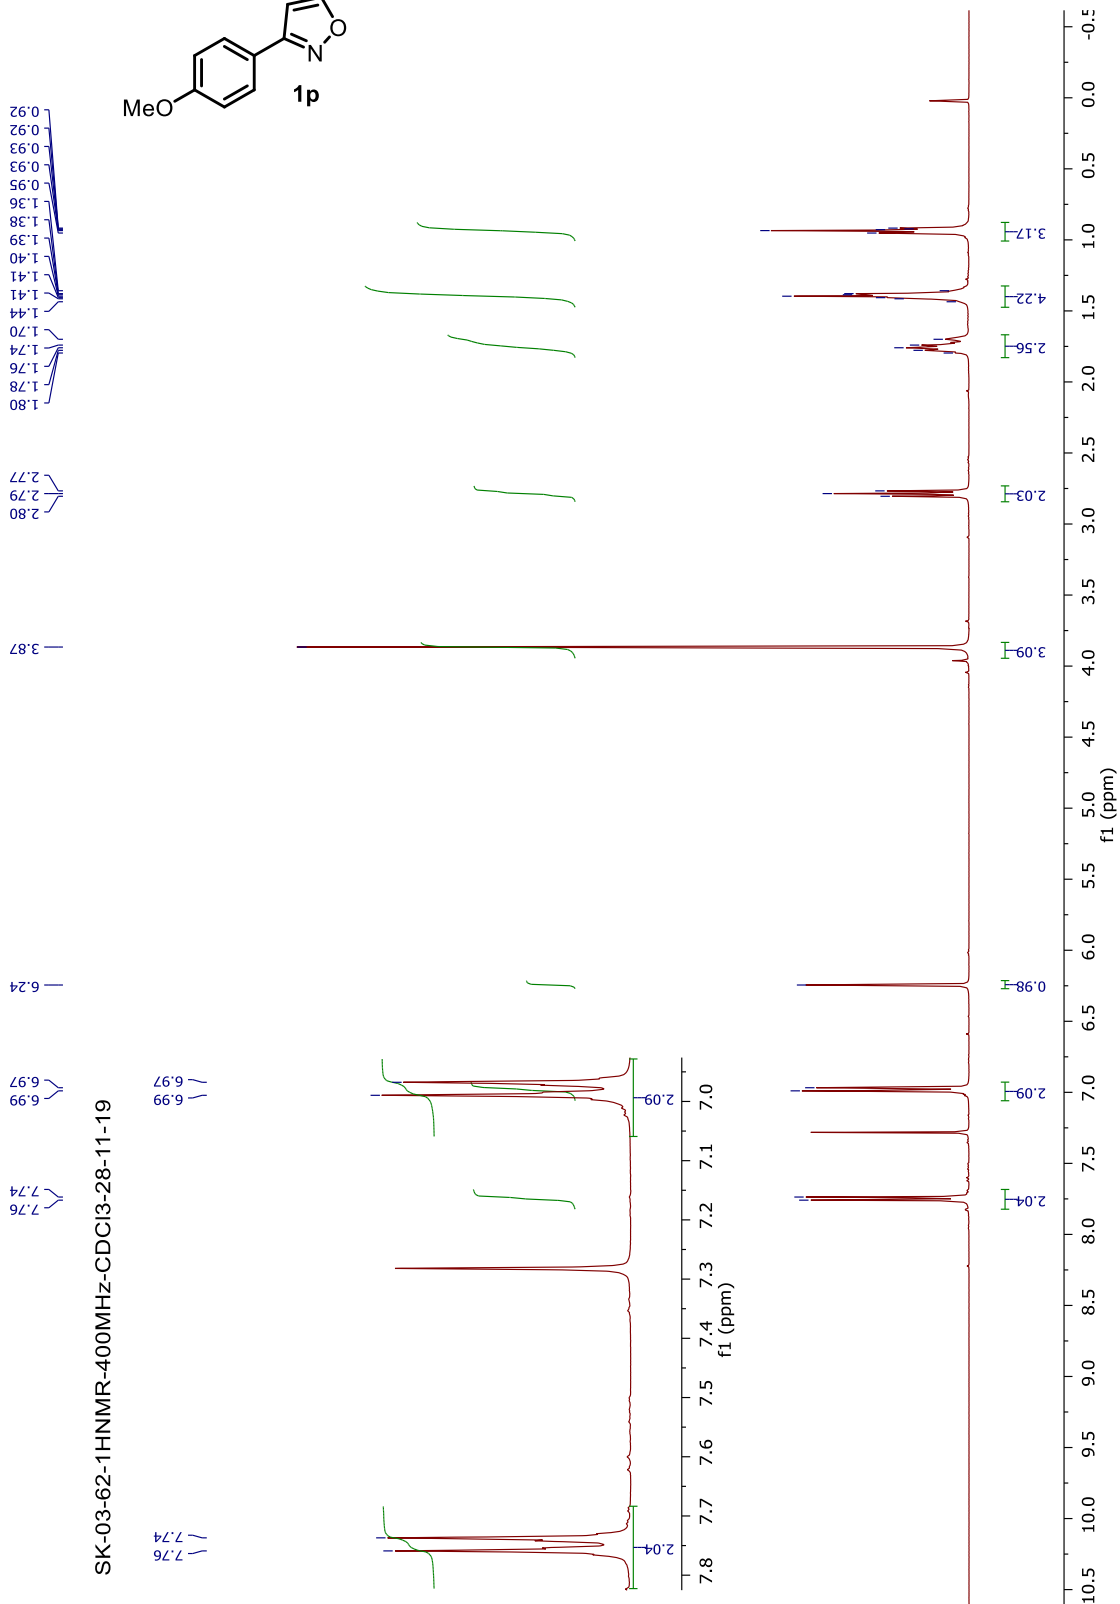

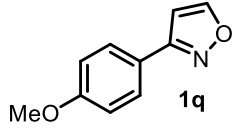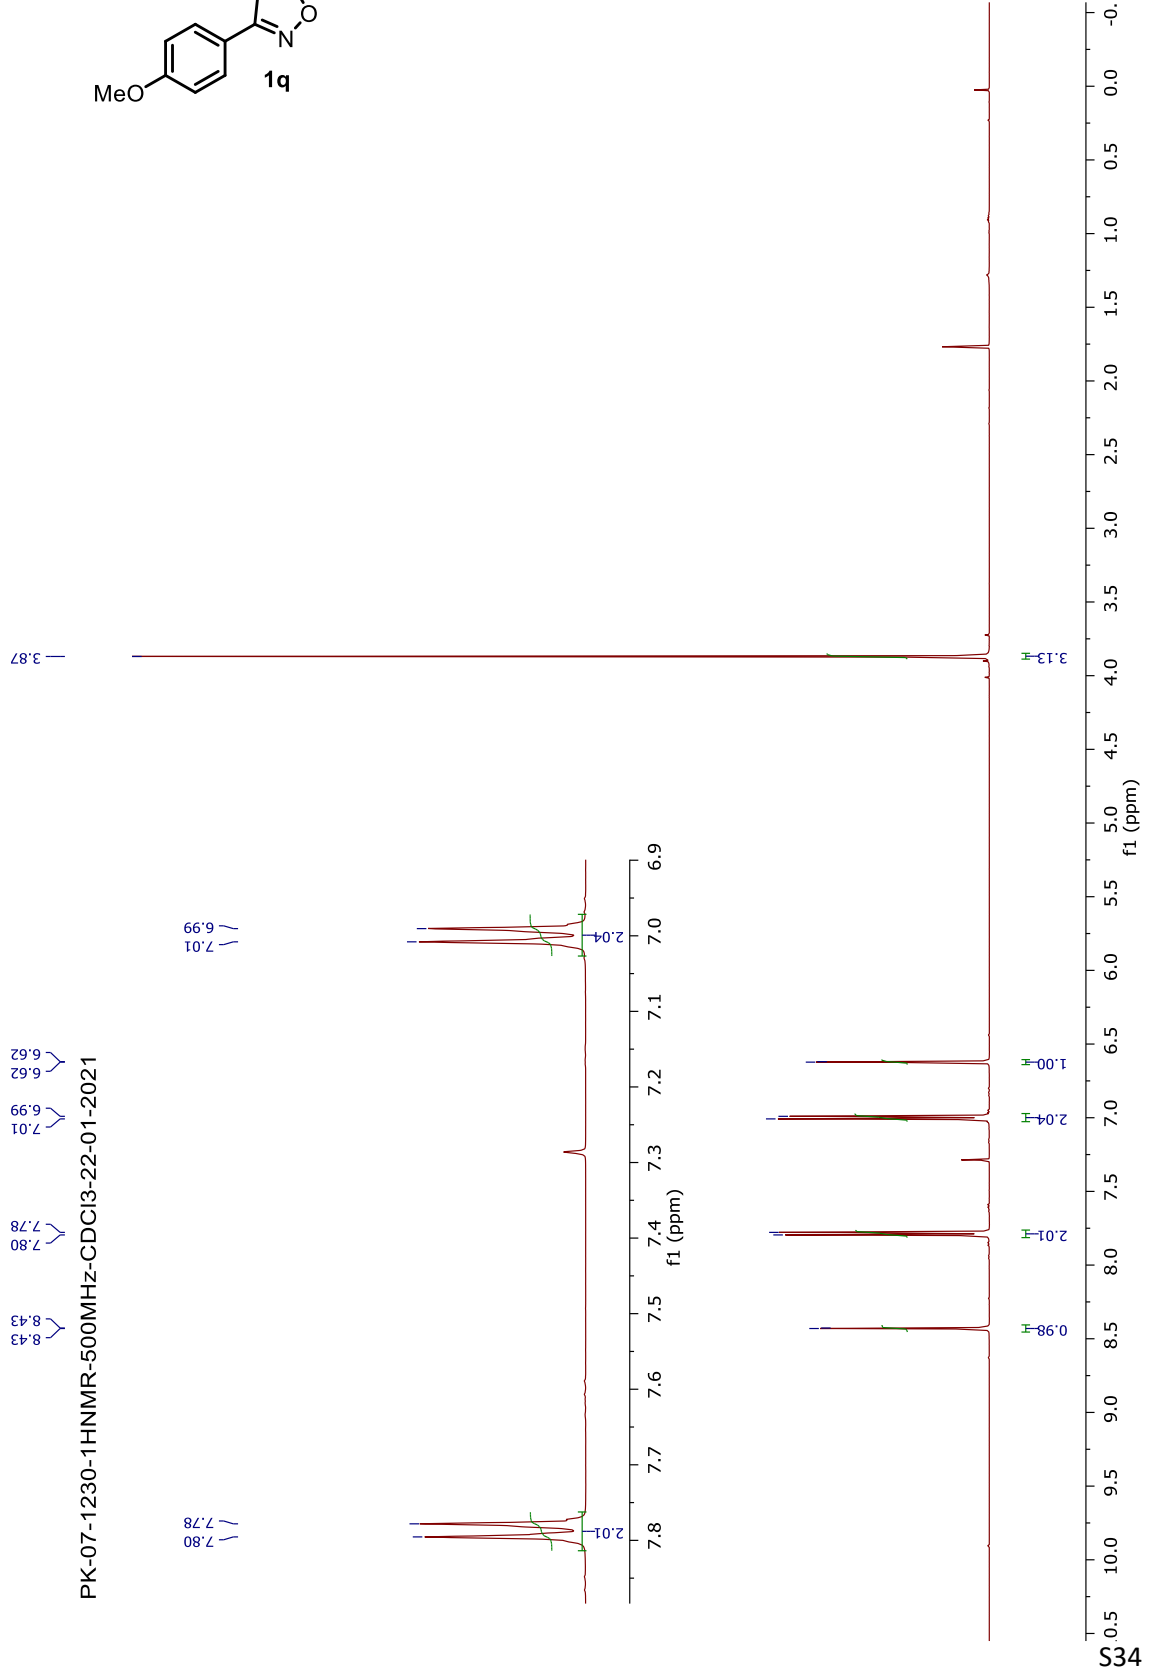



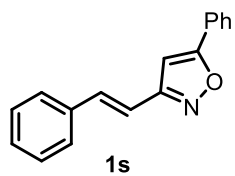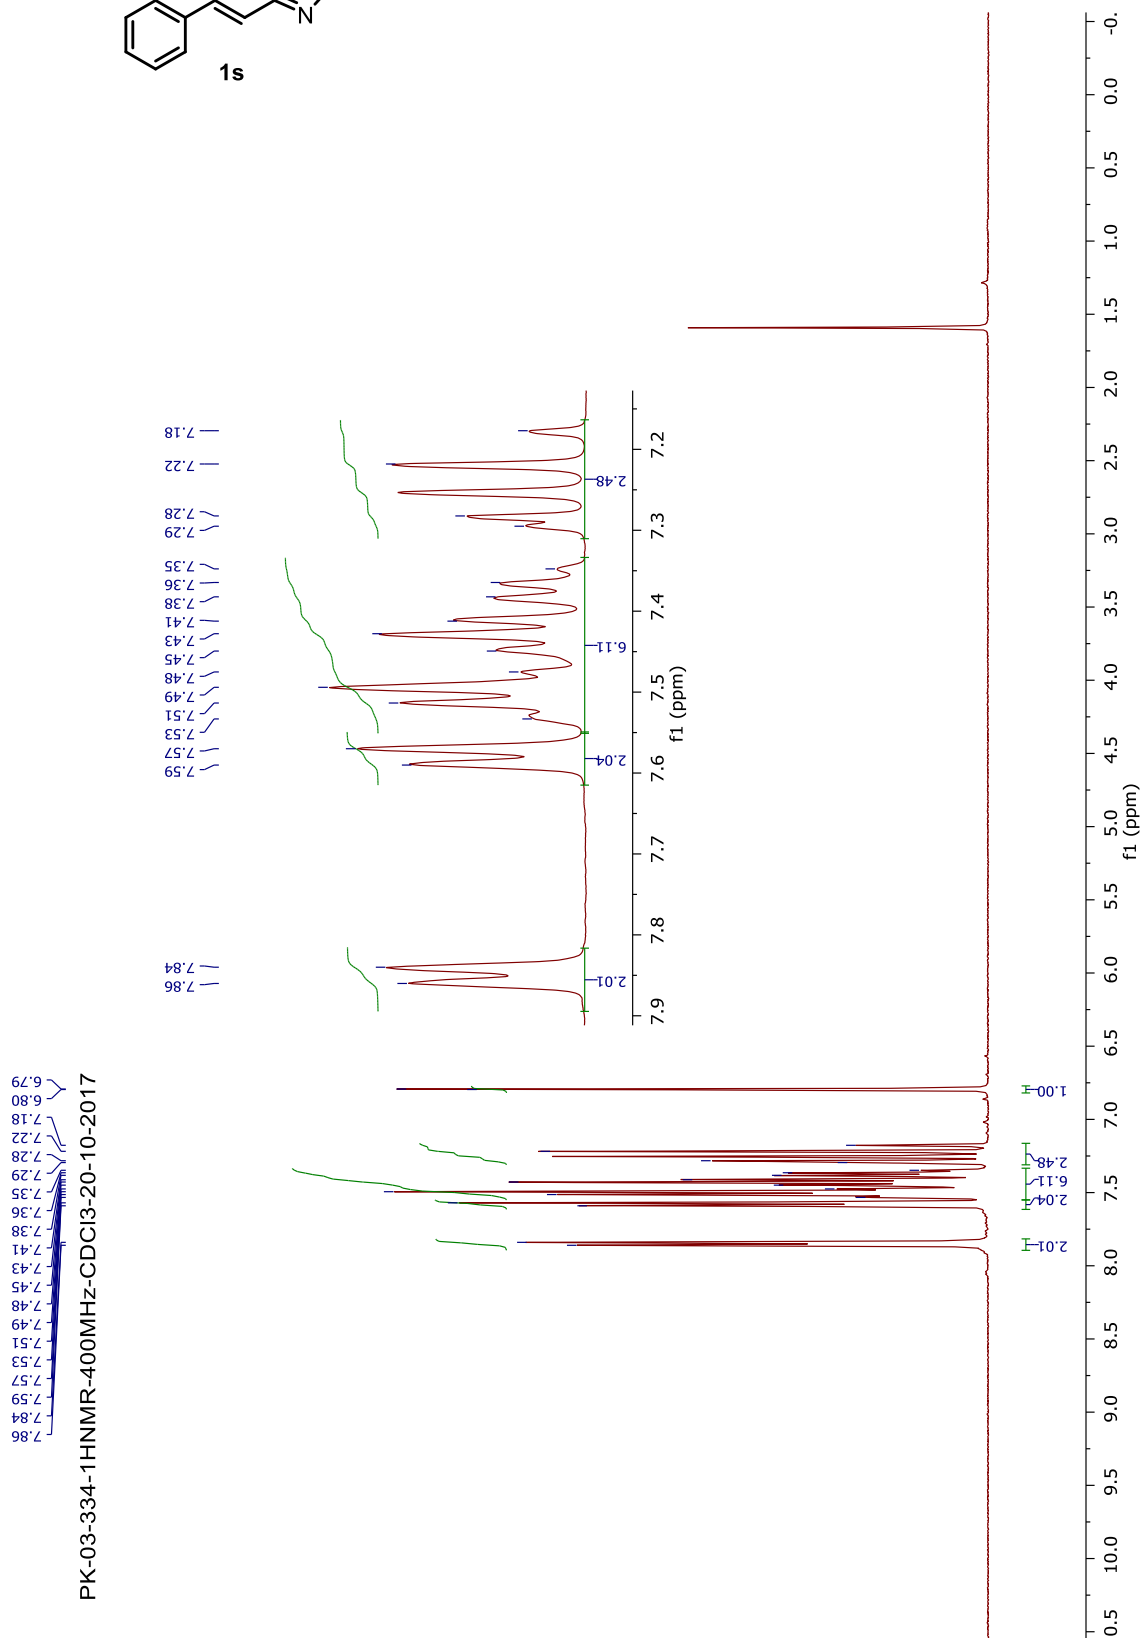



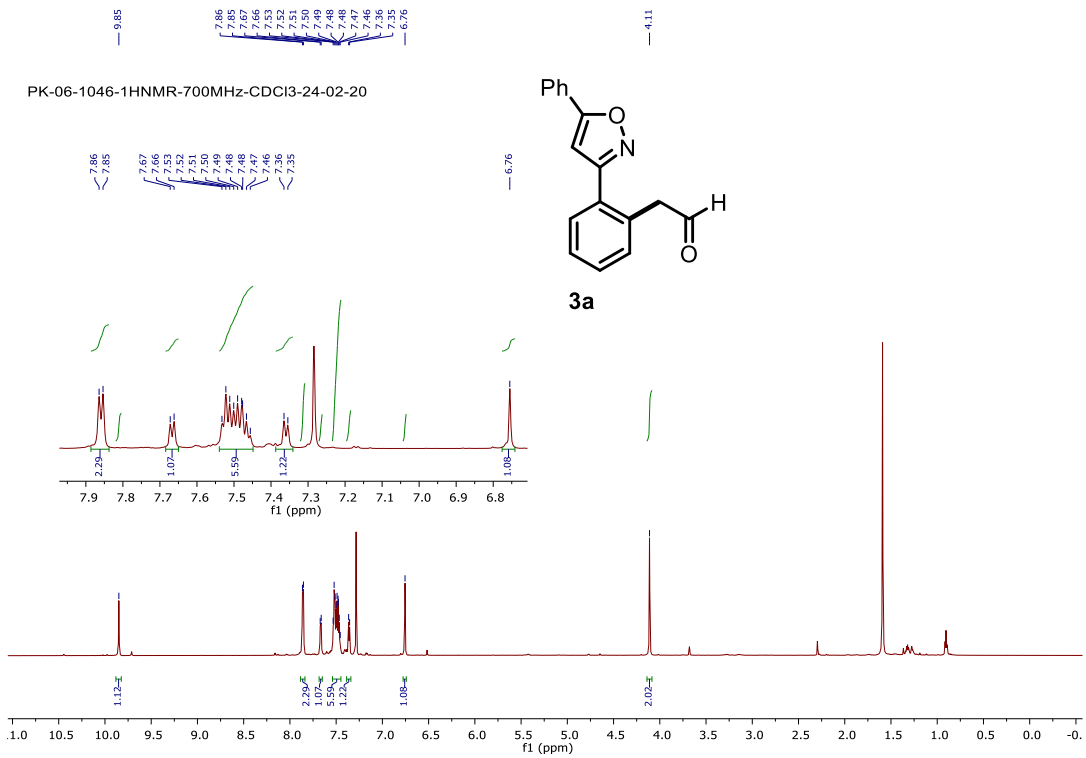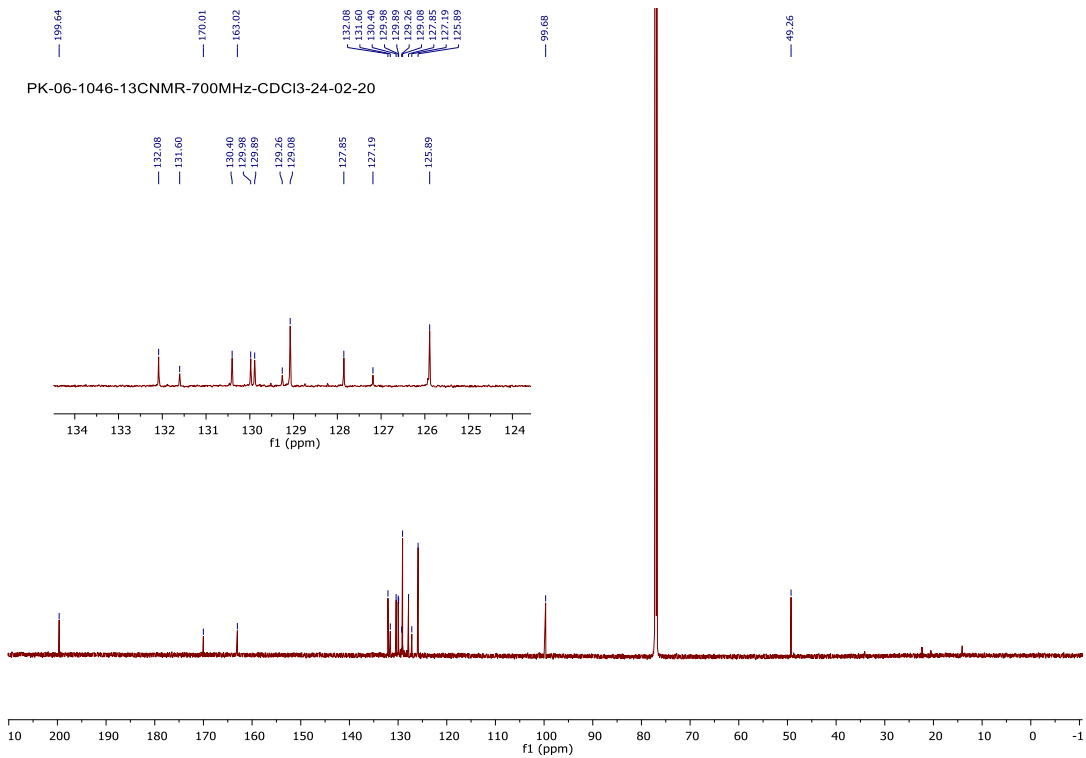

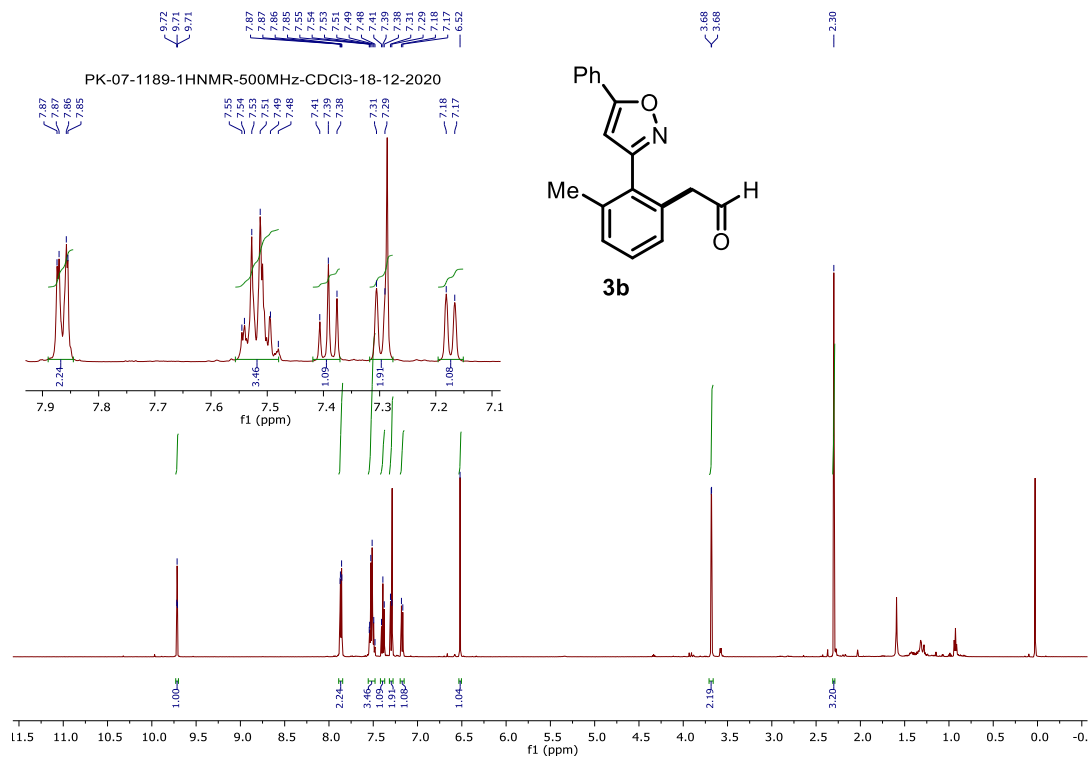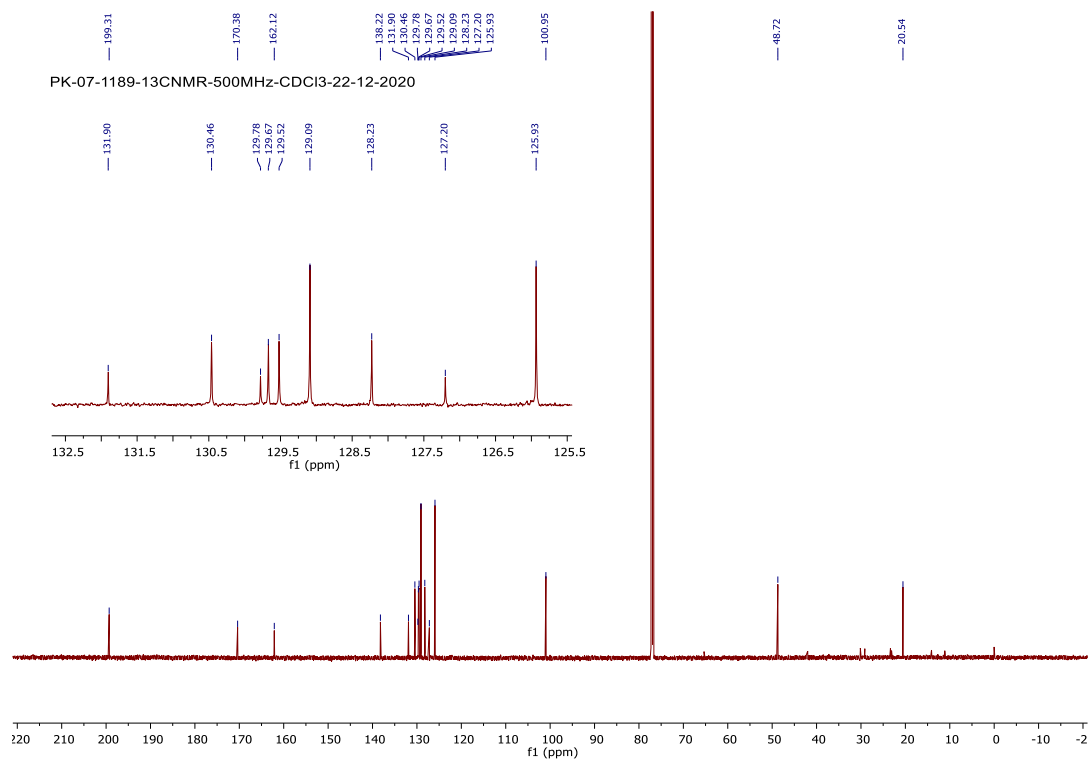





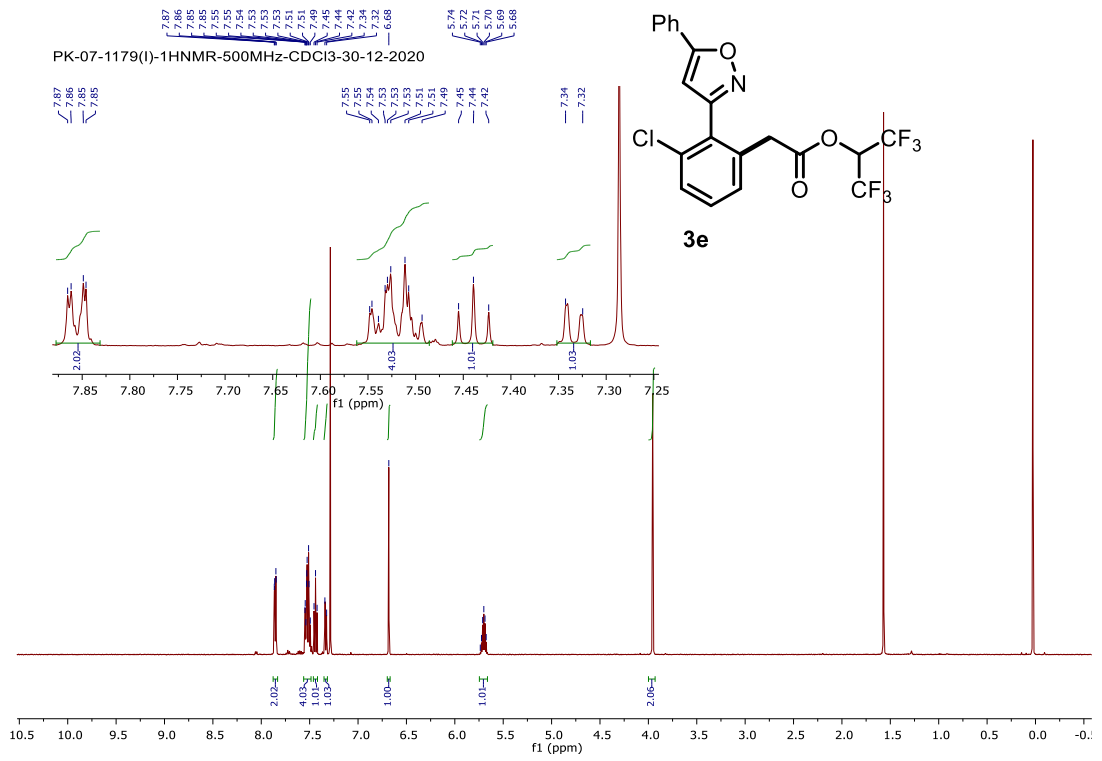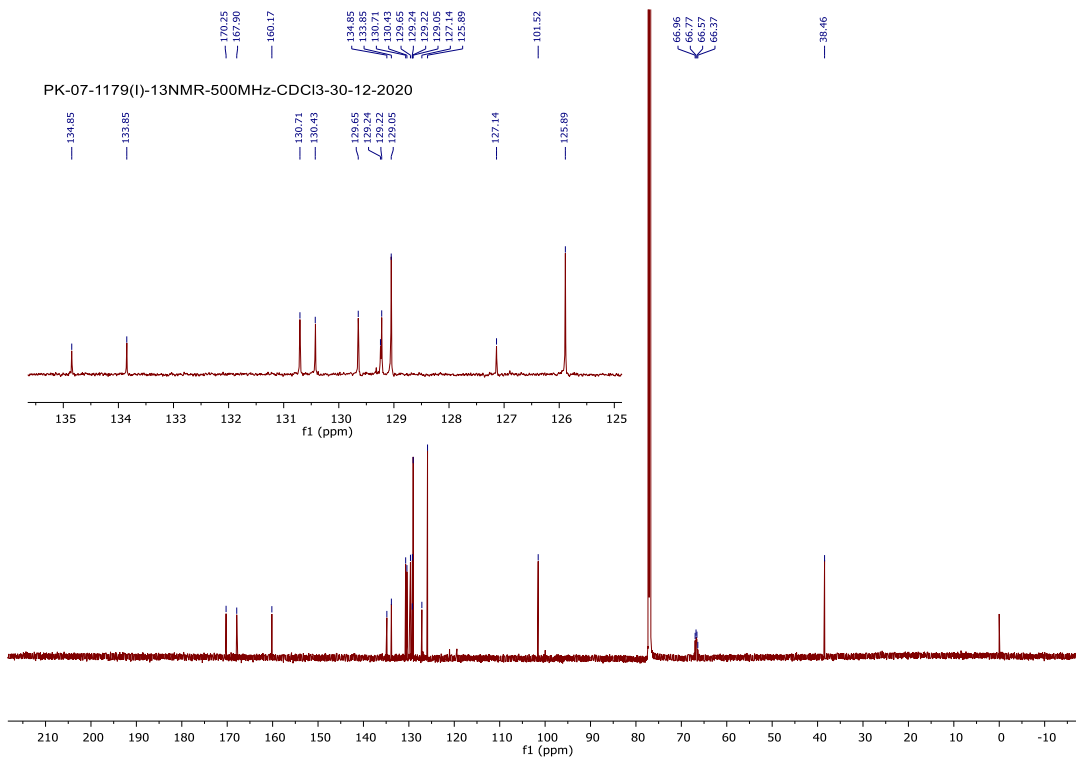

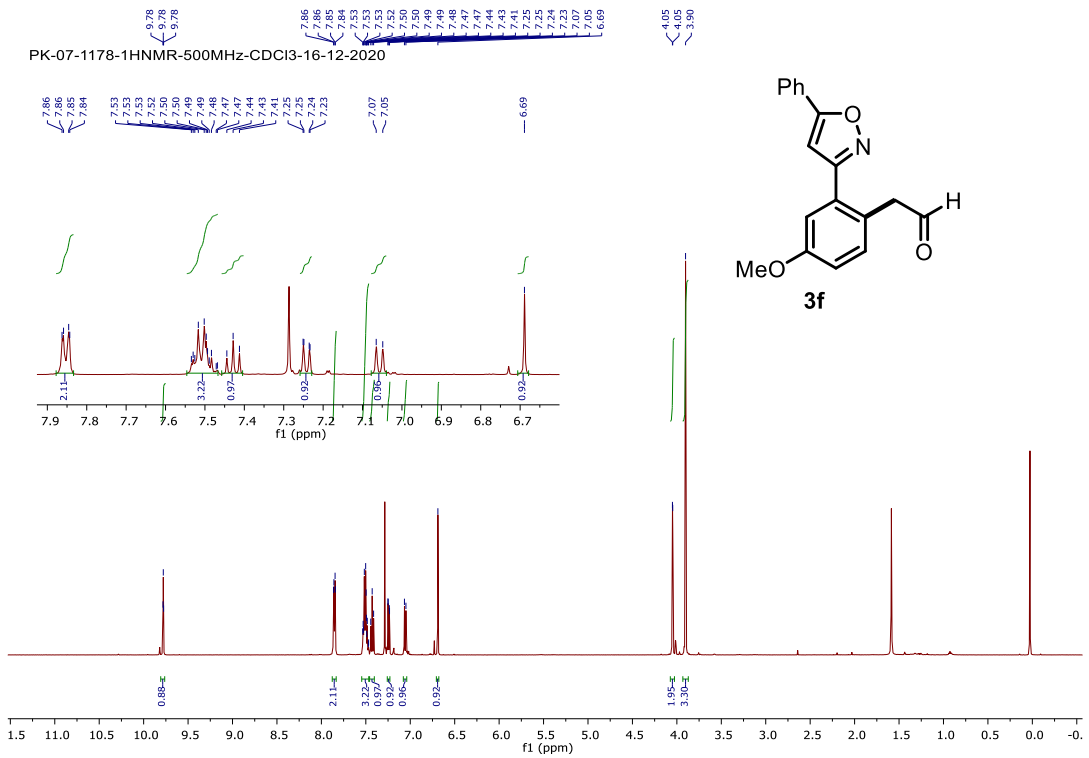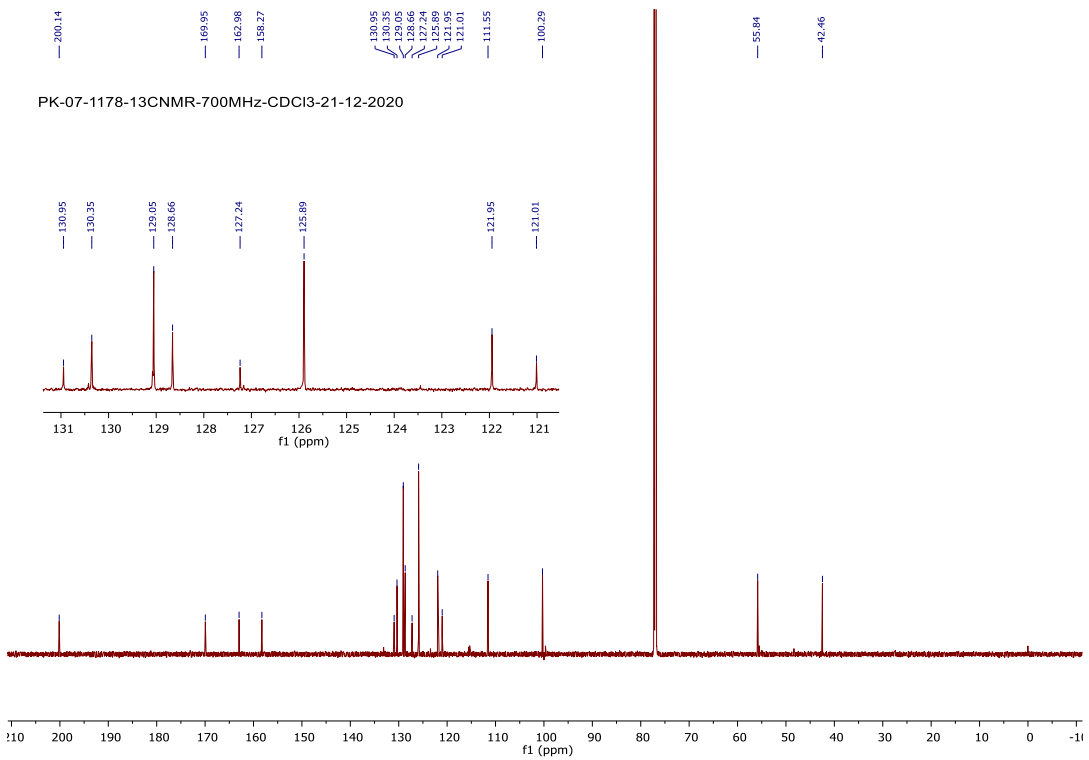

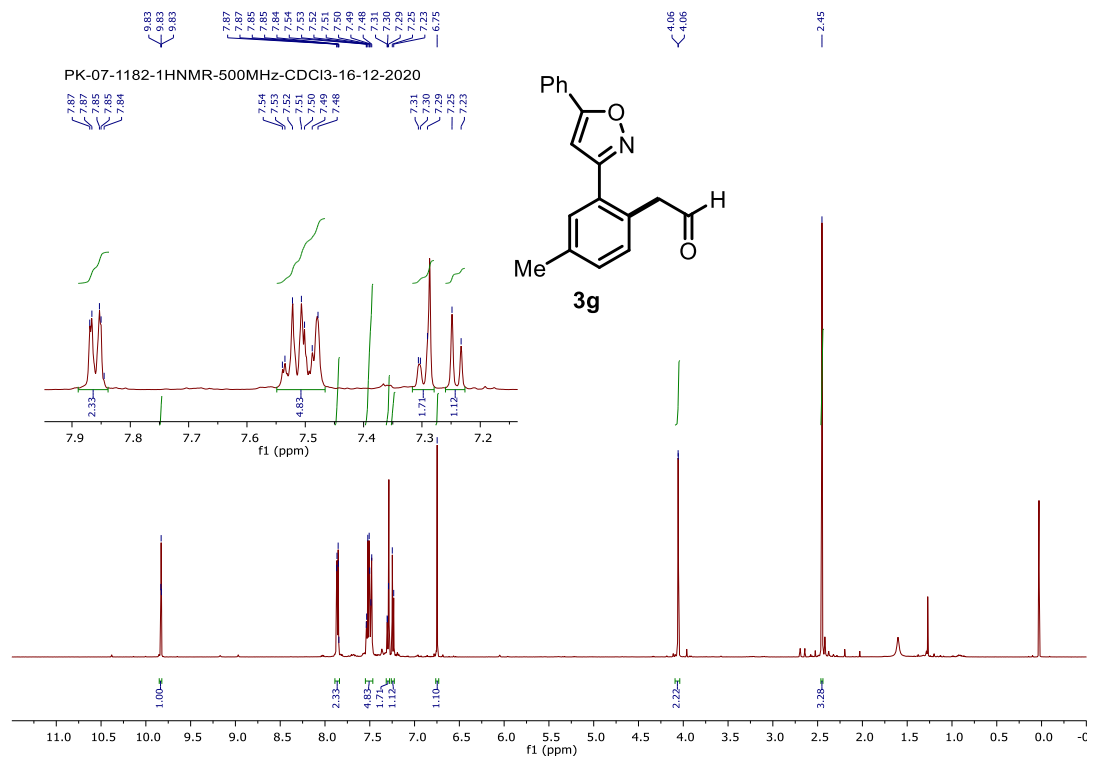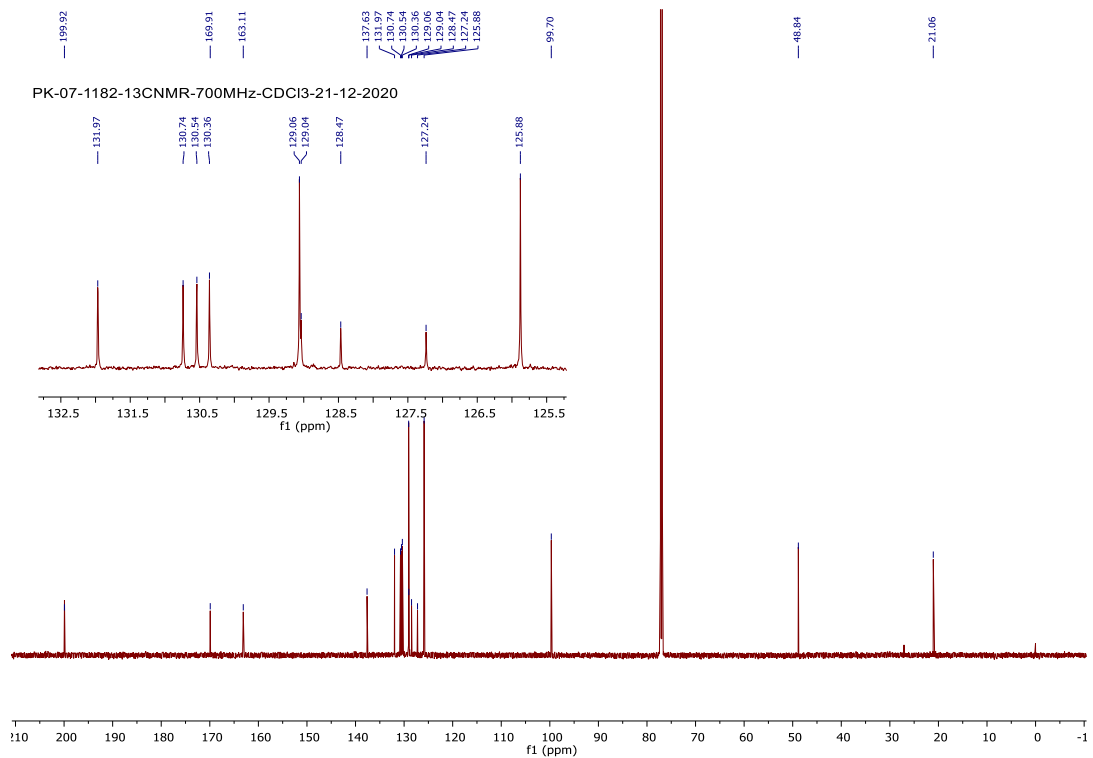





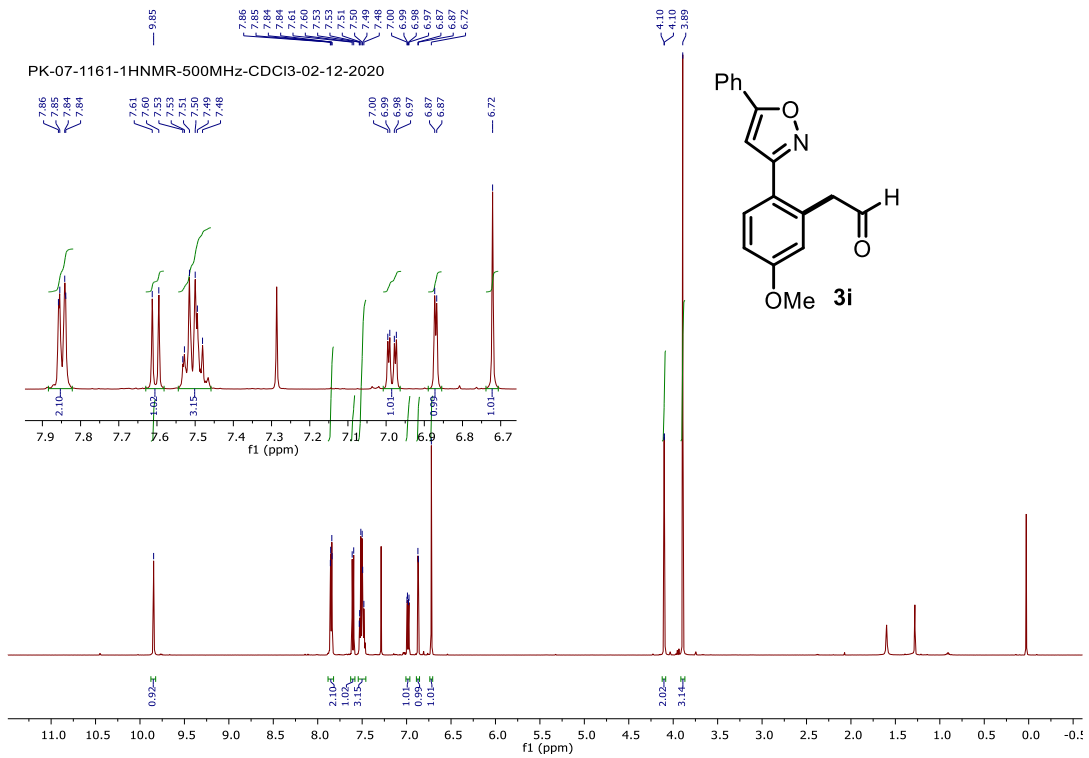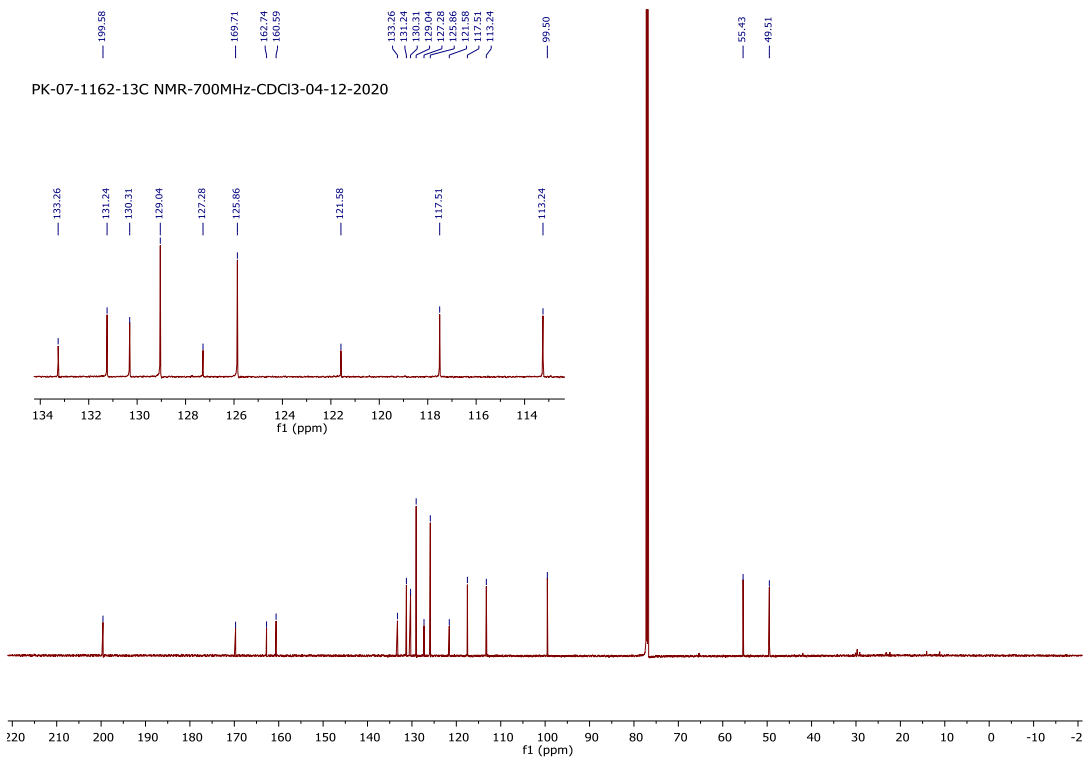

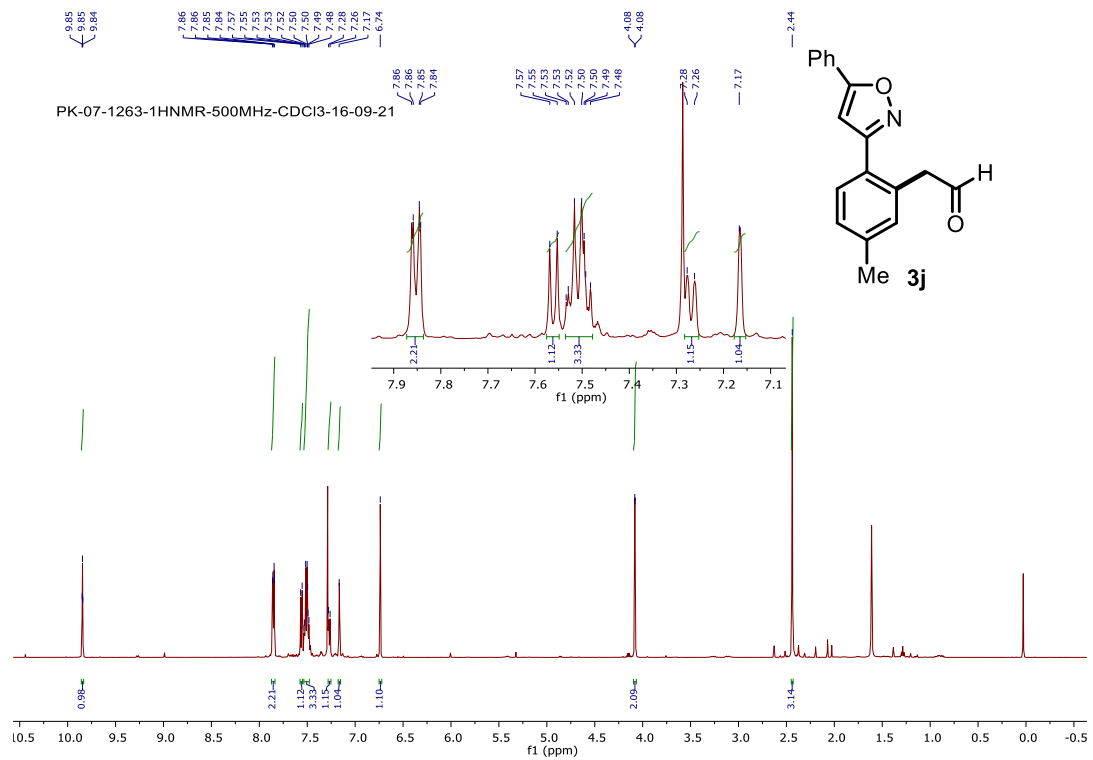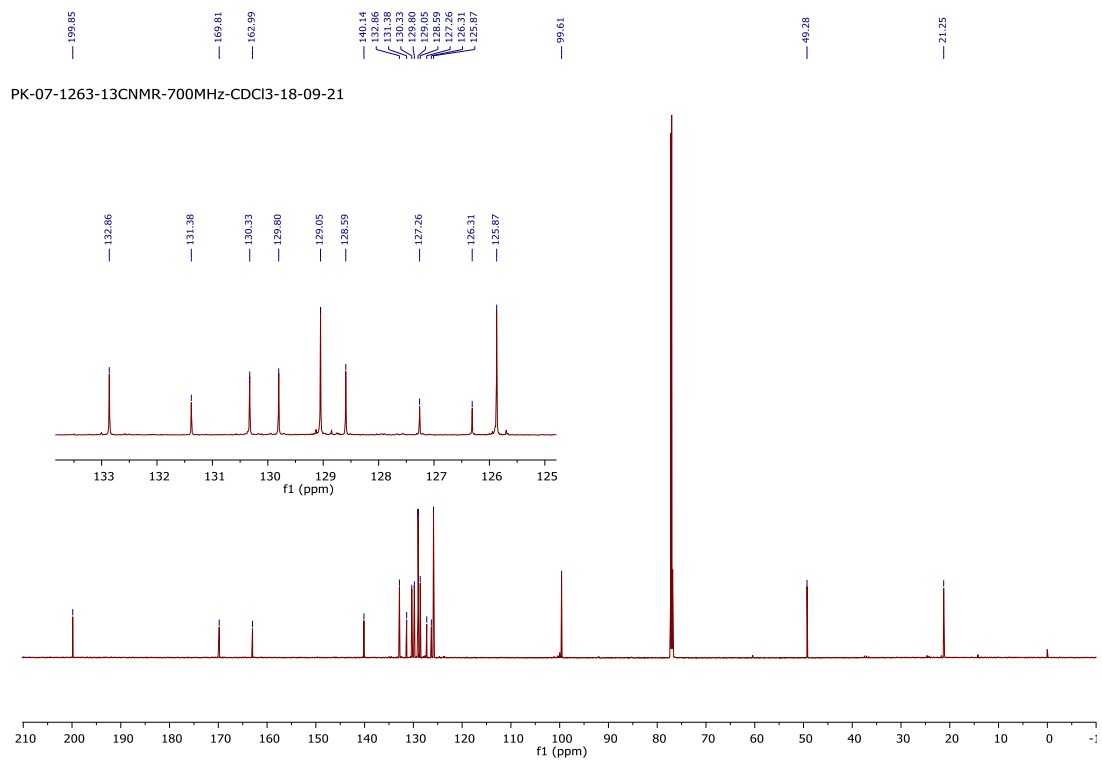

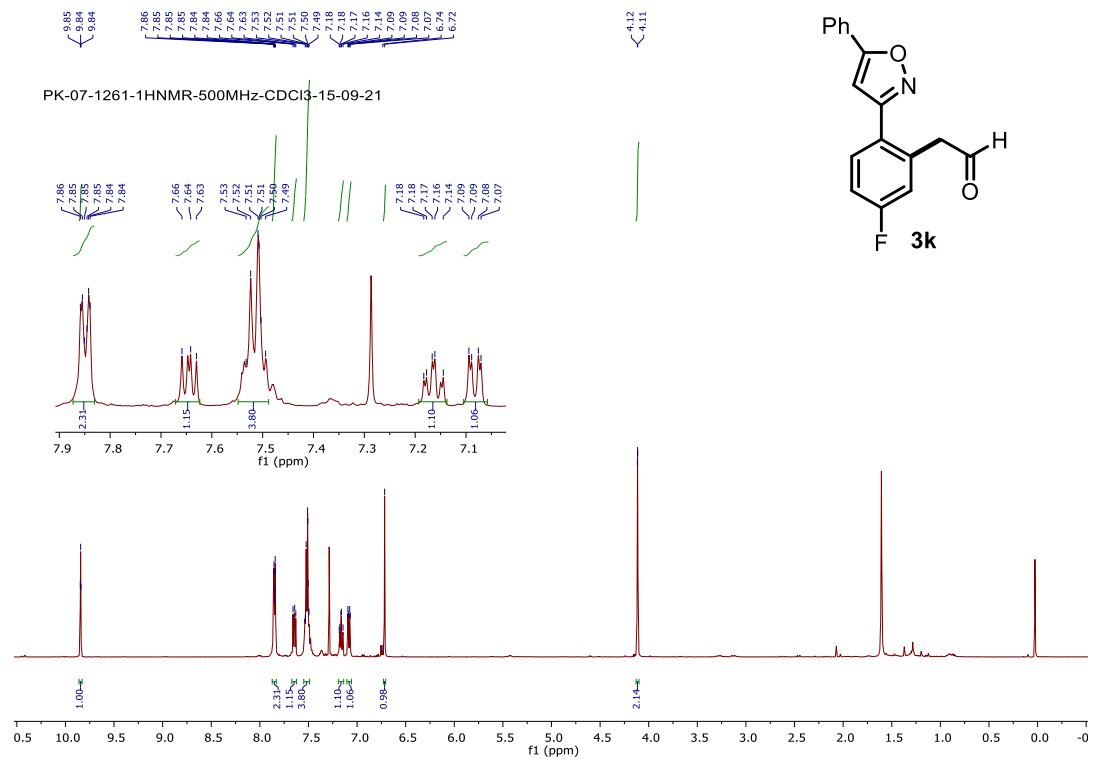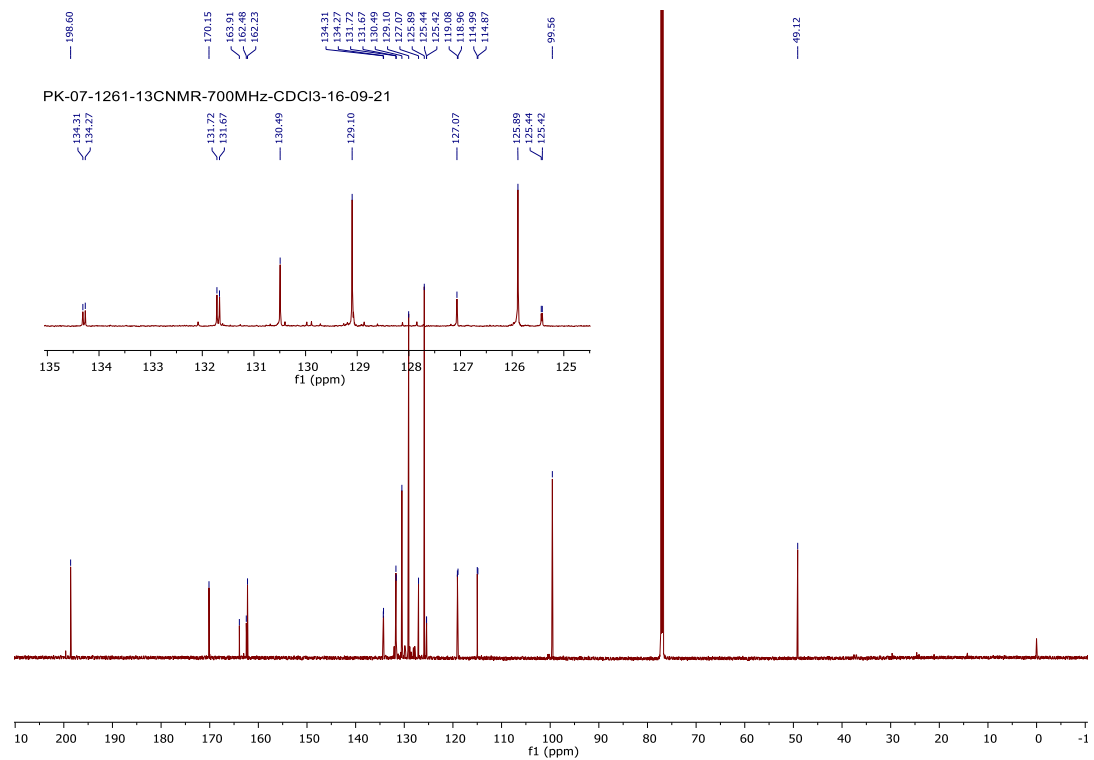

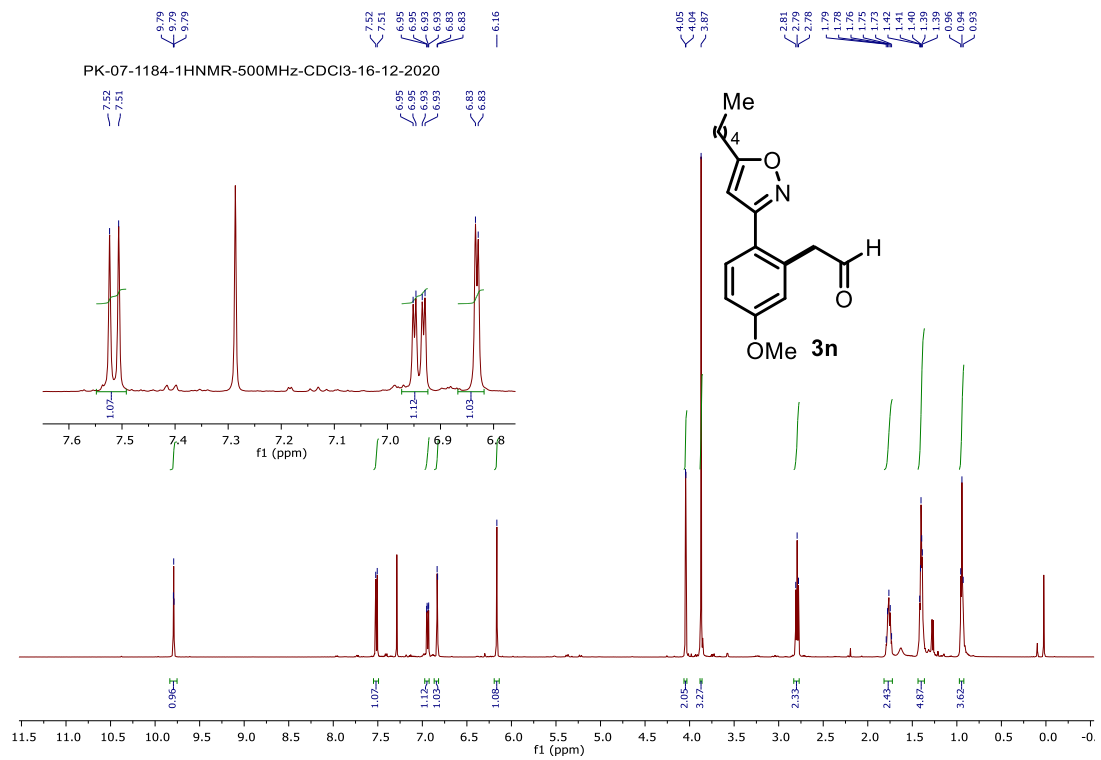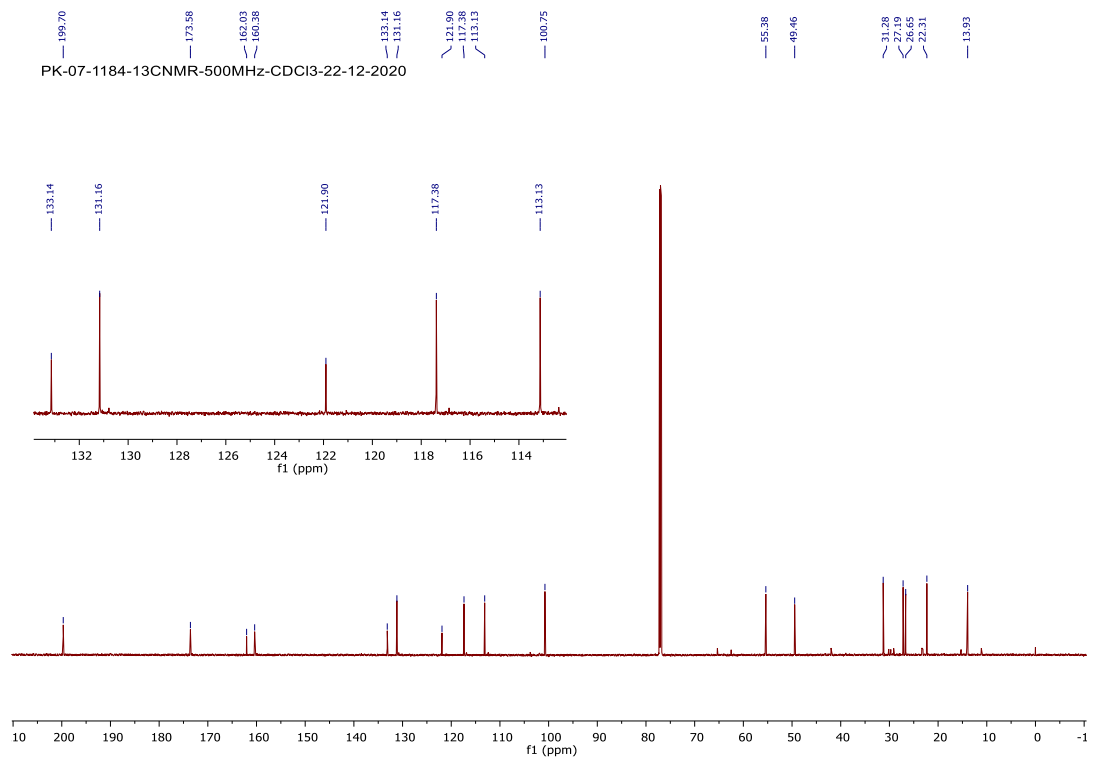

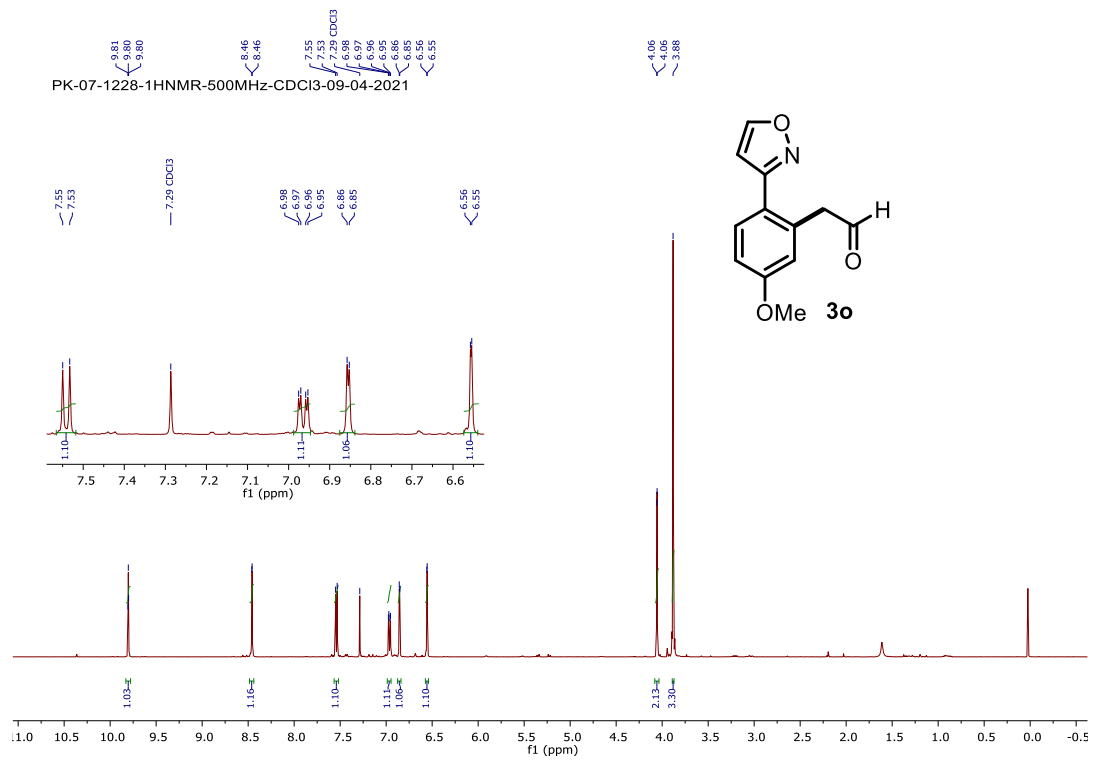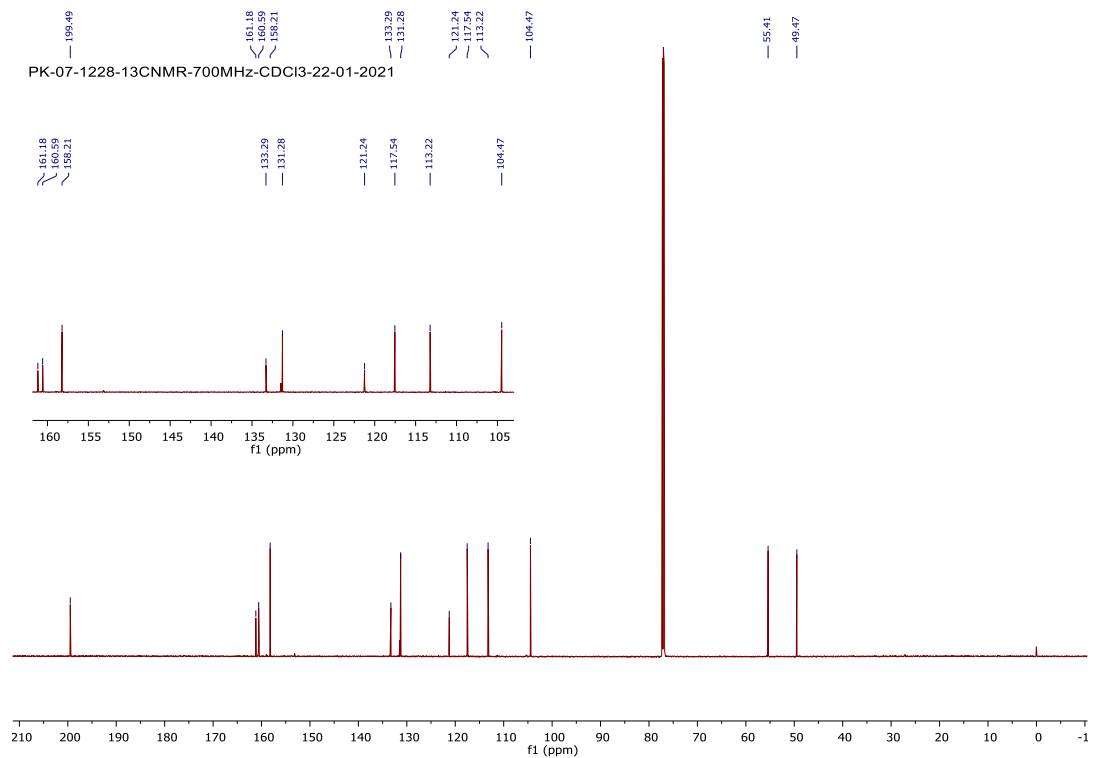

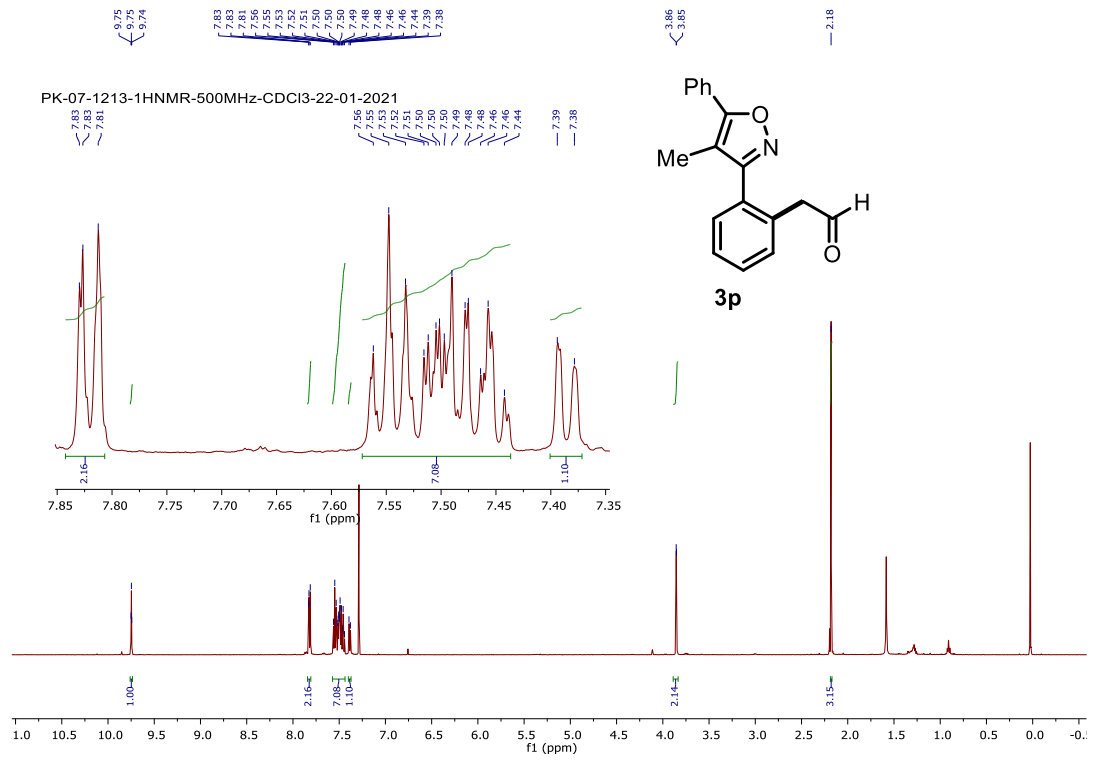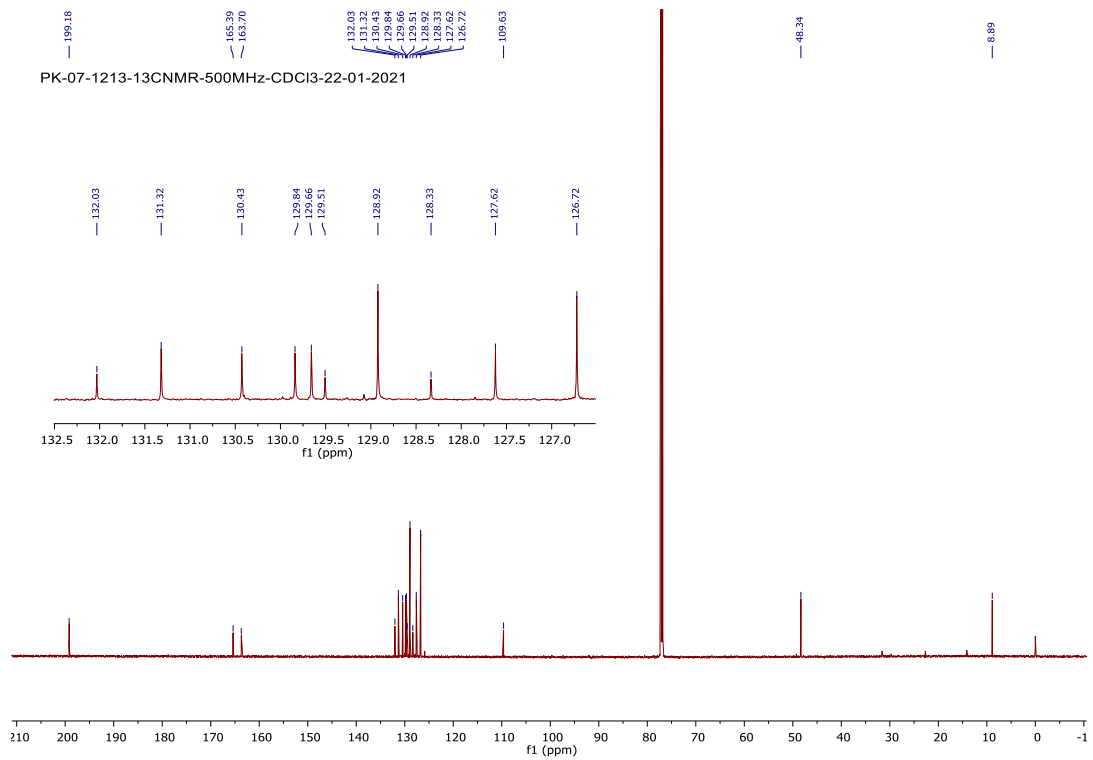

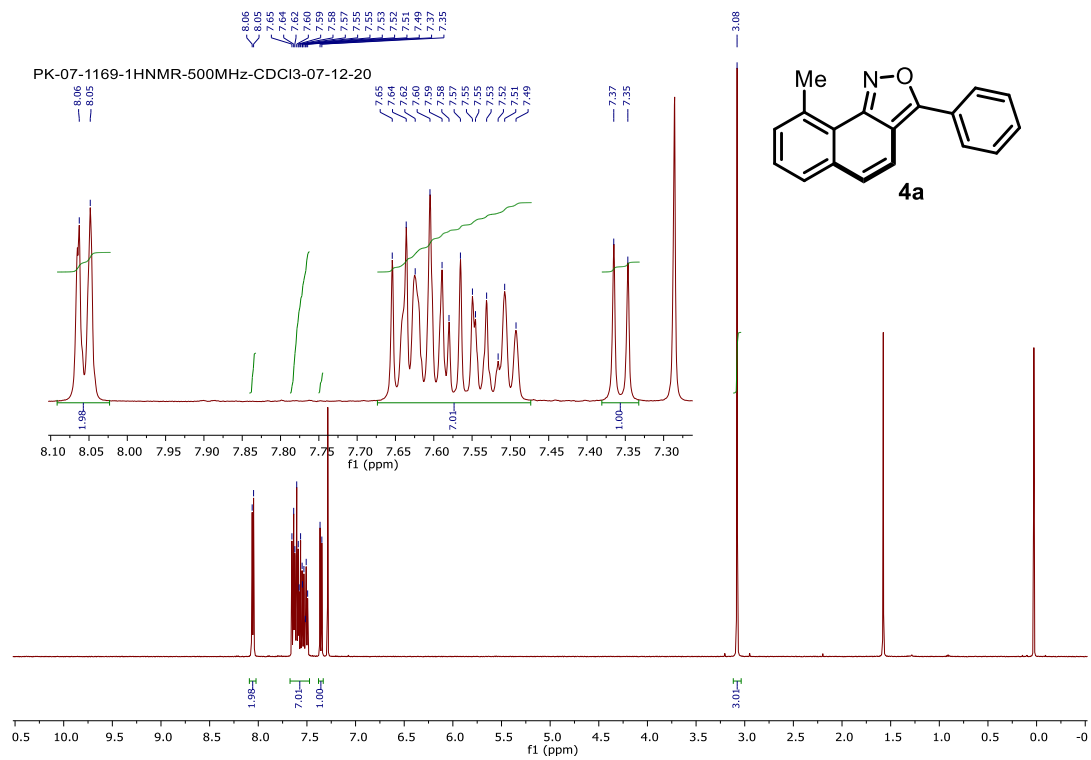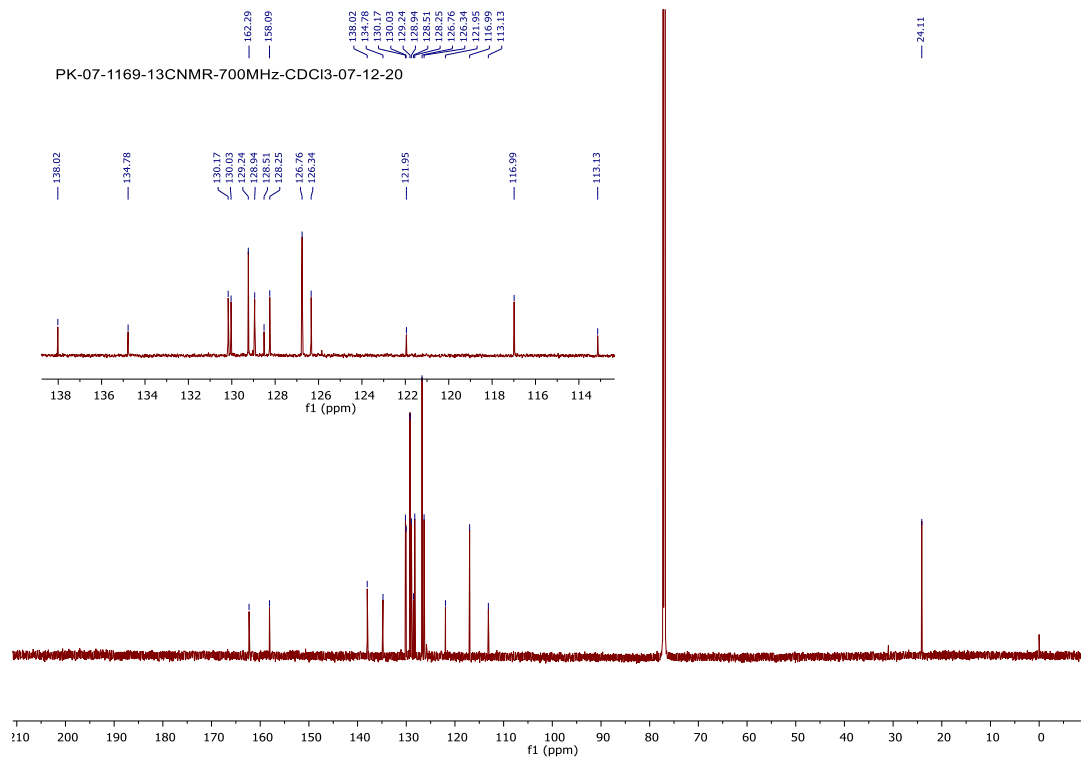

PK-07-1245-1HNMR-500MHz-CDCl3-01-02-2021

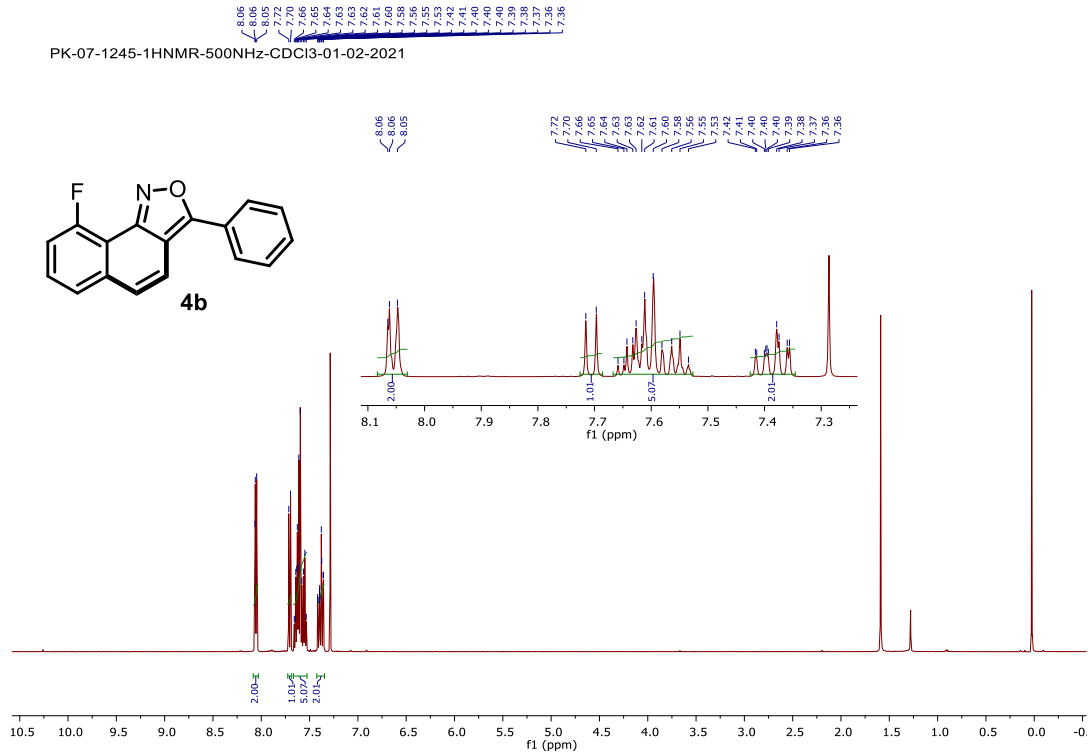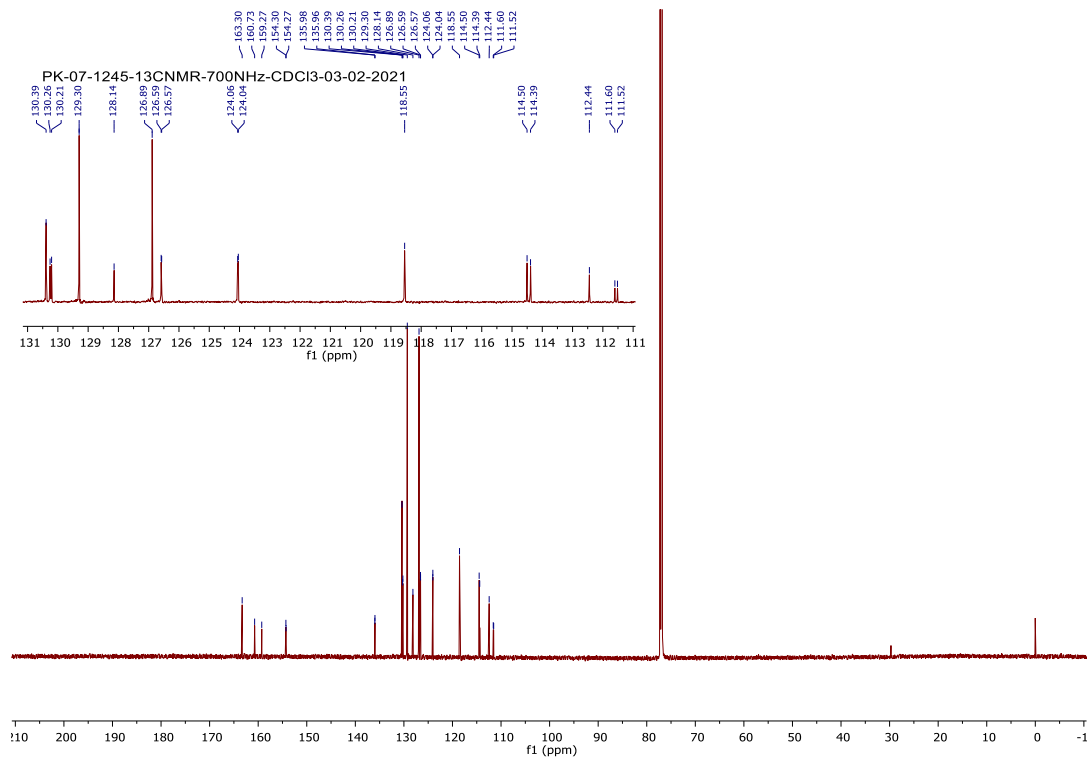





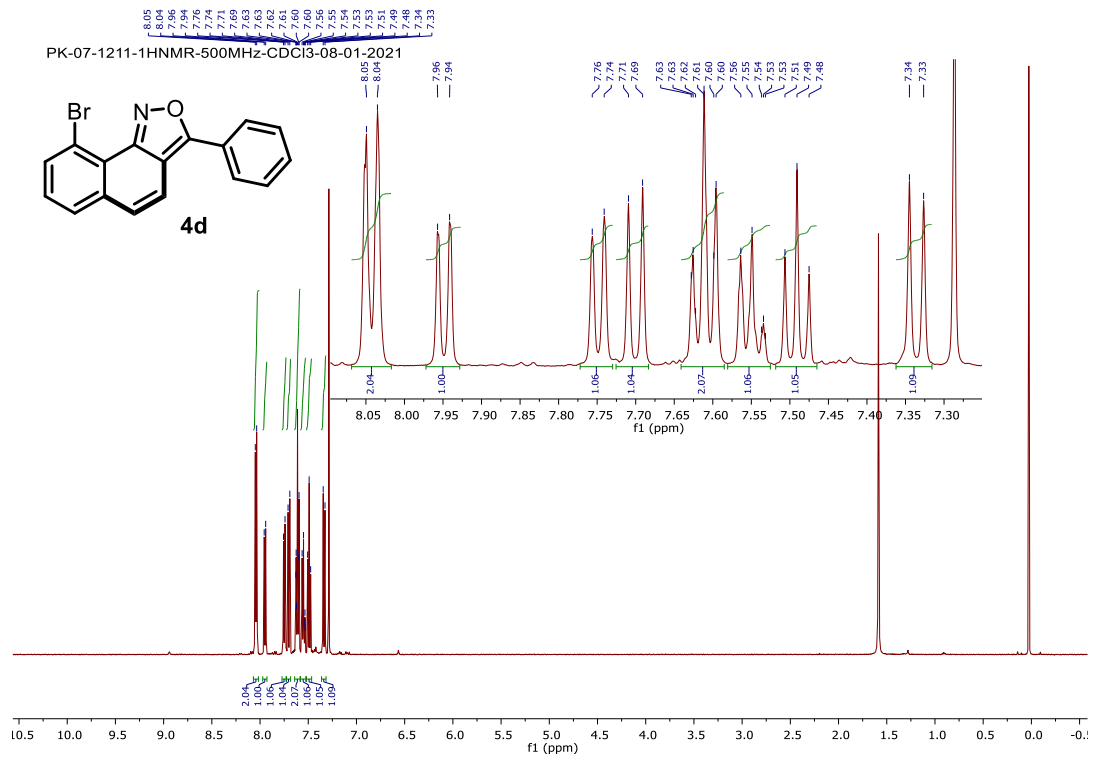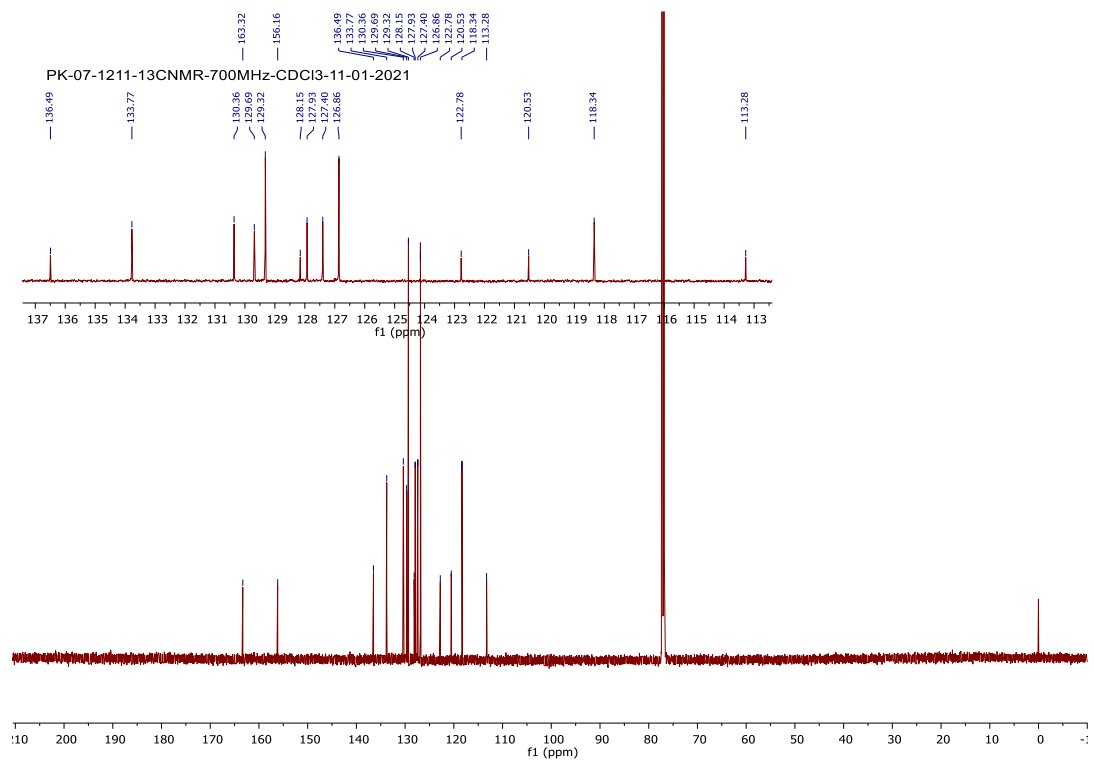

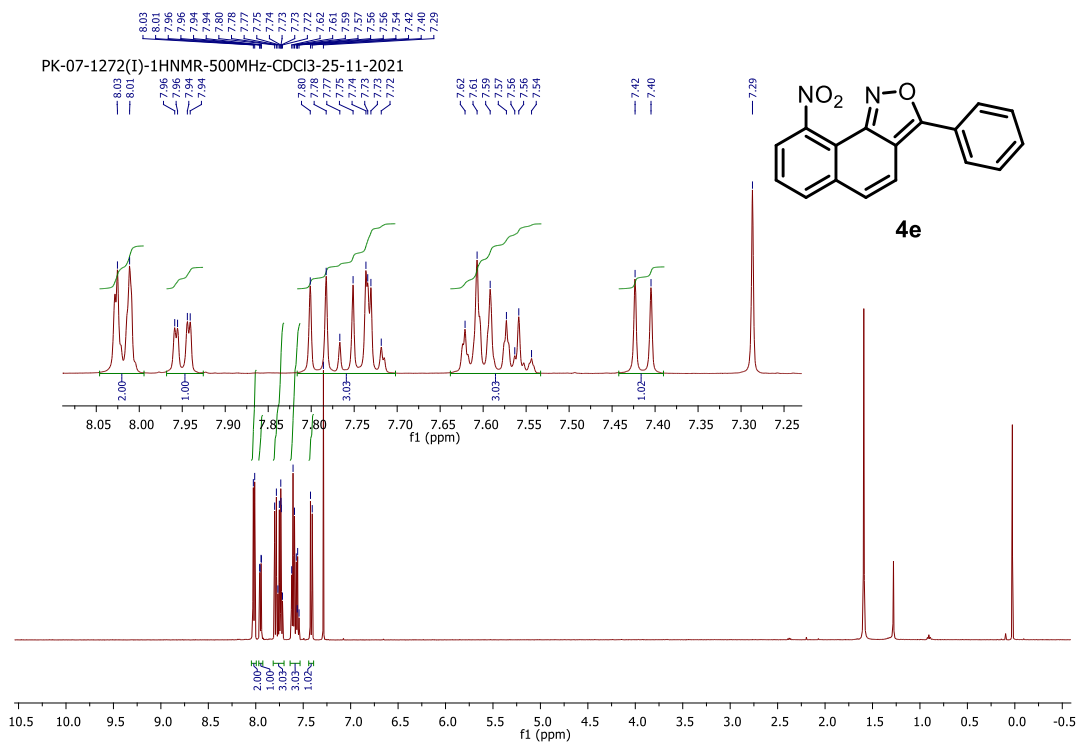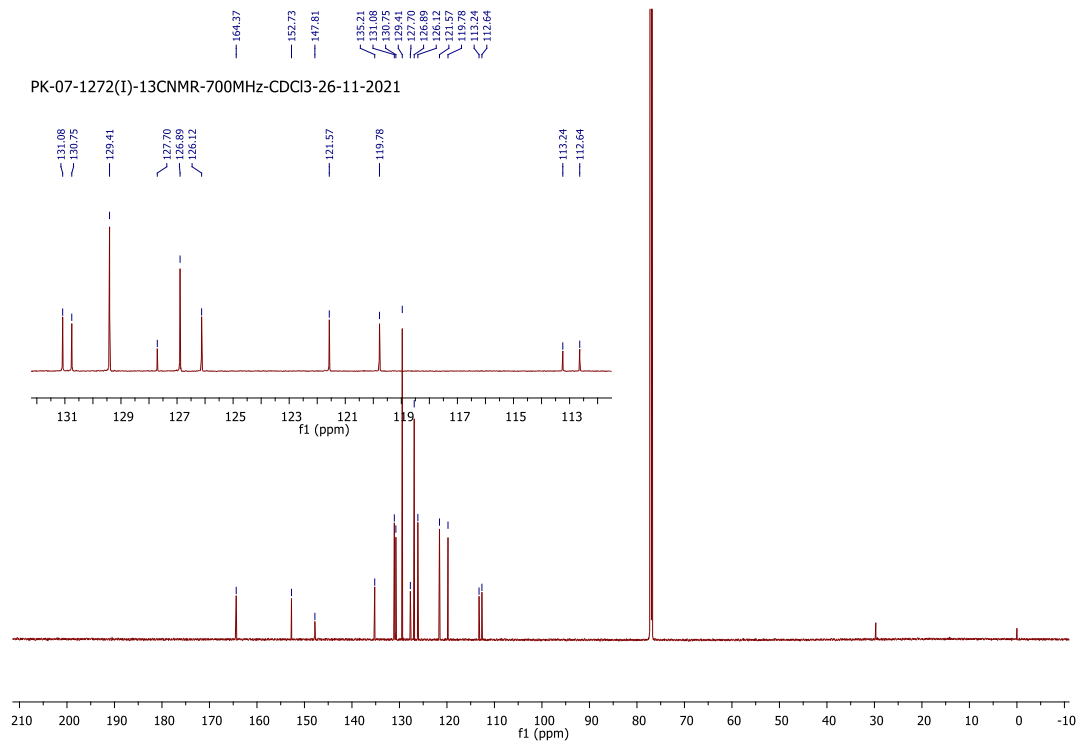

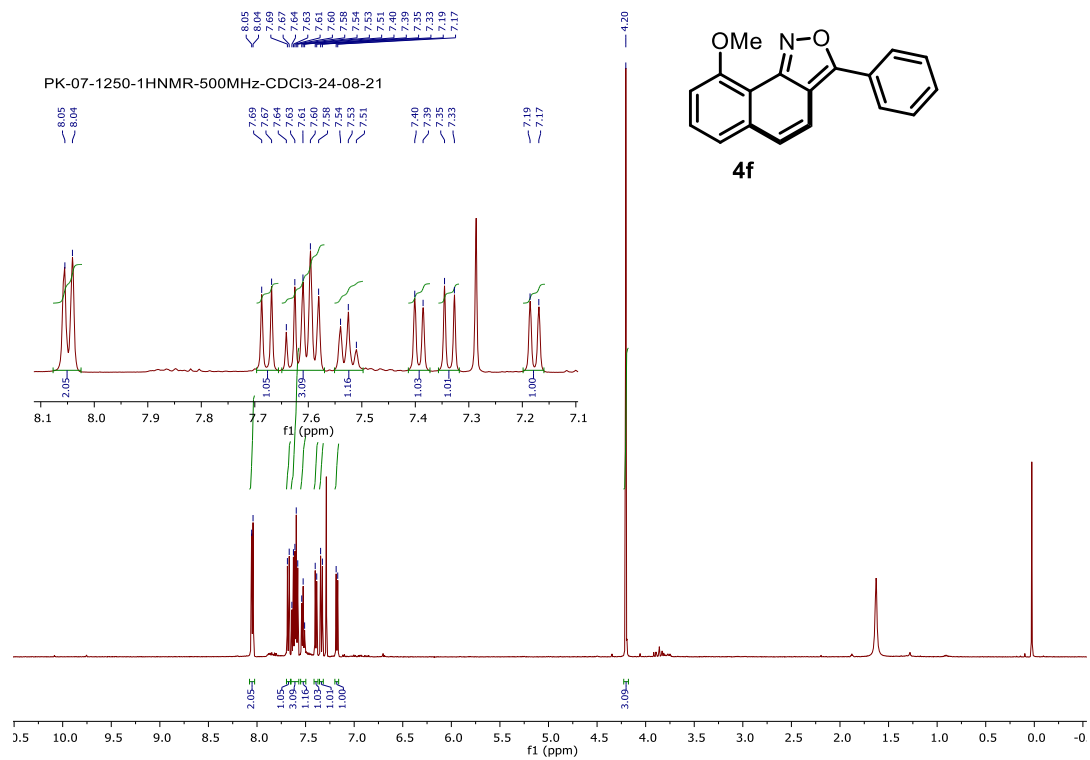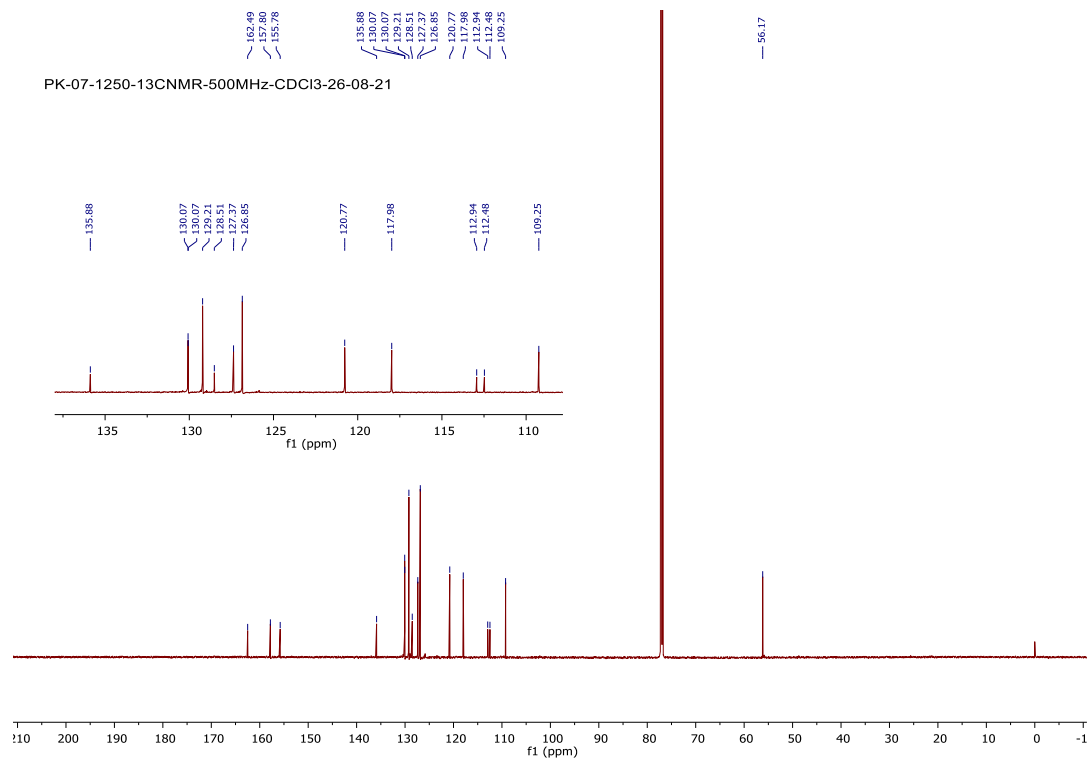

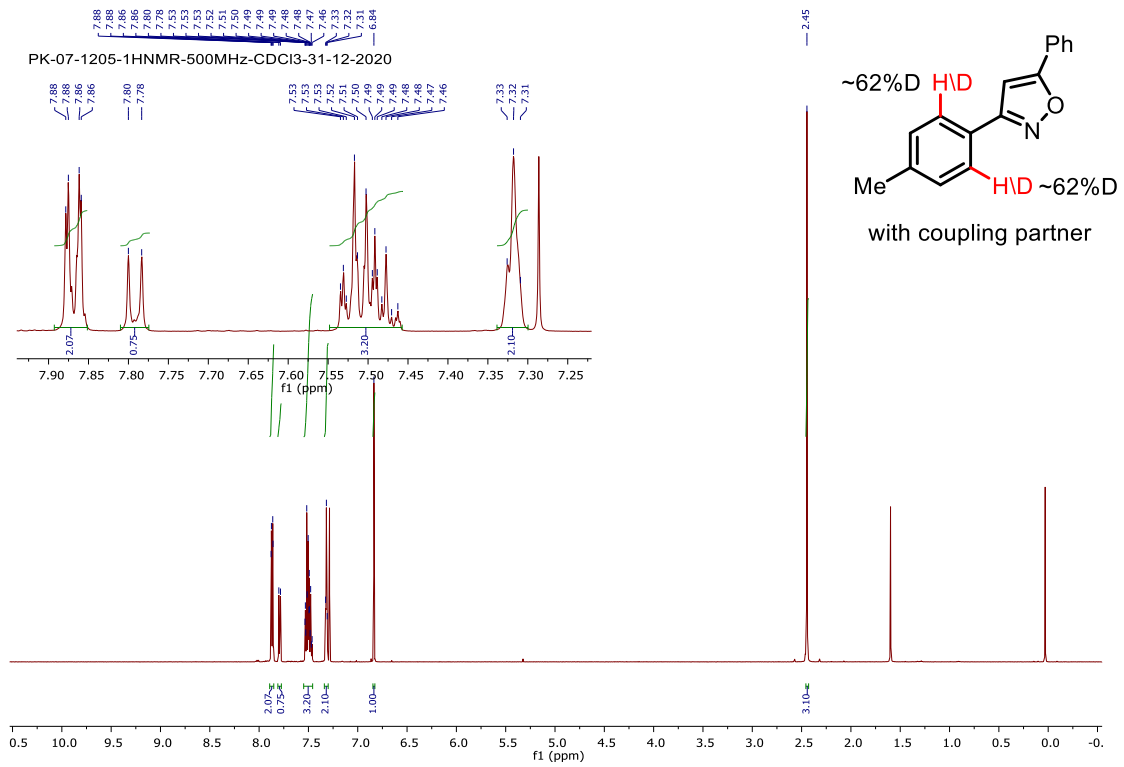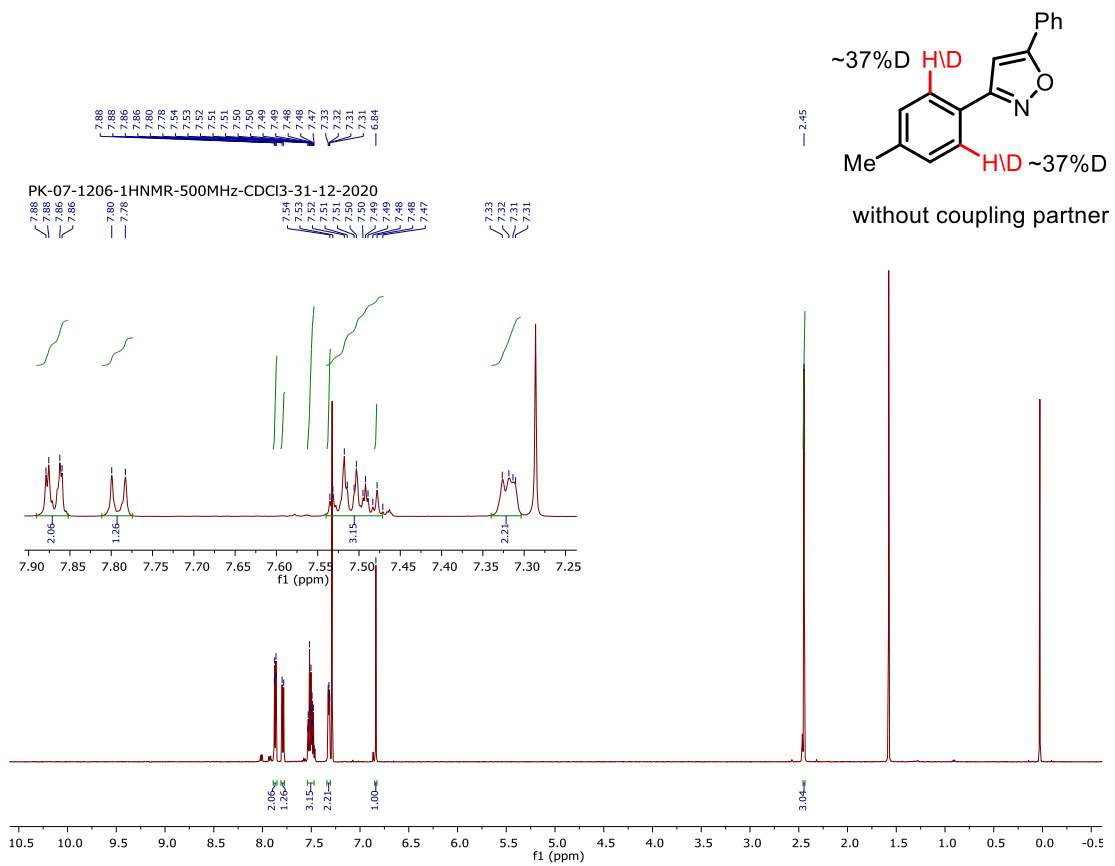



# Display Report

## Analysis Info

Analysis Name D:\Data\new user data 2021\Oct-2021\12-Oct\Dr.M.Kapur-PK-07-1267-1.d  
Method tune mix\_low.New.021117.m  
Sample Name PK-07-1267-1  
Comment

Acquisition Date 10/12/2021 11:41:09 AM  
Operator RUCHI  
Instrument micrOTOF-Q II 10330

## Acquisition Parameter

|             |            |                       |           |                  |           |
|-------------|------------|-----------------------|-----------|------------------|-----------|
| Source Type | ESI        | Ion Polarity          | Positive  | Set Nebulizer    | 0.4 Bar   |
| Focus       | Not active | Set Capillary         | 4600 V    | Set Dry Heater   | 180 °C    |
| Scan Begin  | 50 m/z     | Set End Plate Offset  | -500 V    | Set Dry Gas      | 4.0 l/min |
| Scan End    | 3000 m/z   | Set Collision Cell RF | 100.0 Vpp | Set Divert Valve | Waste     |

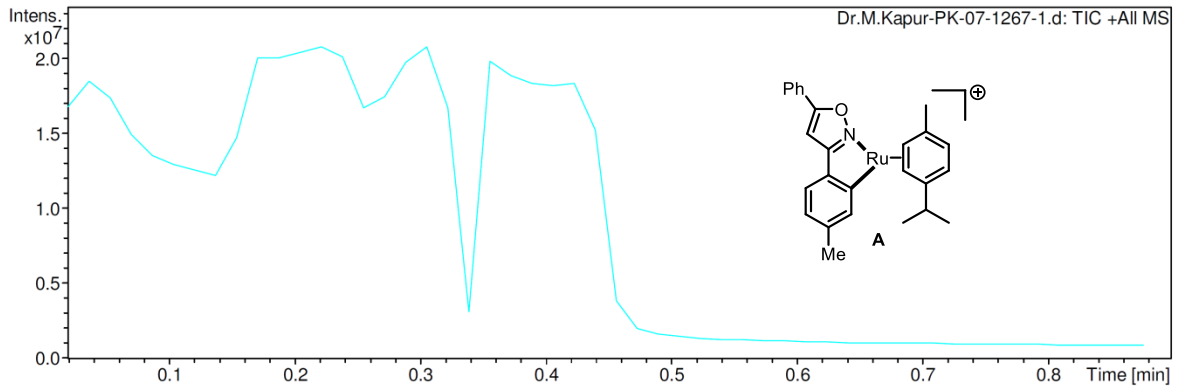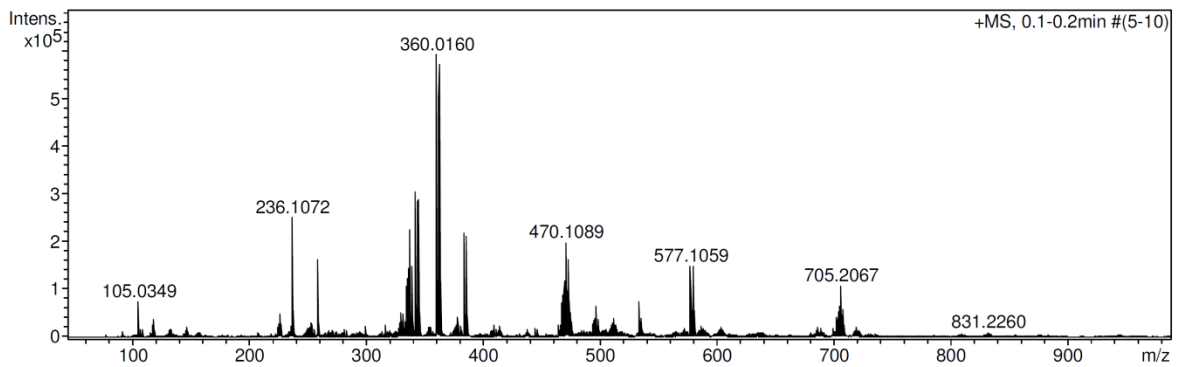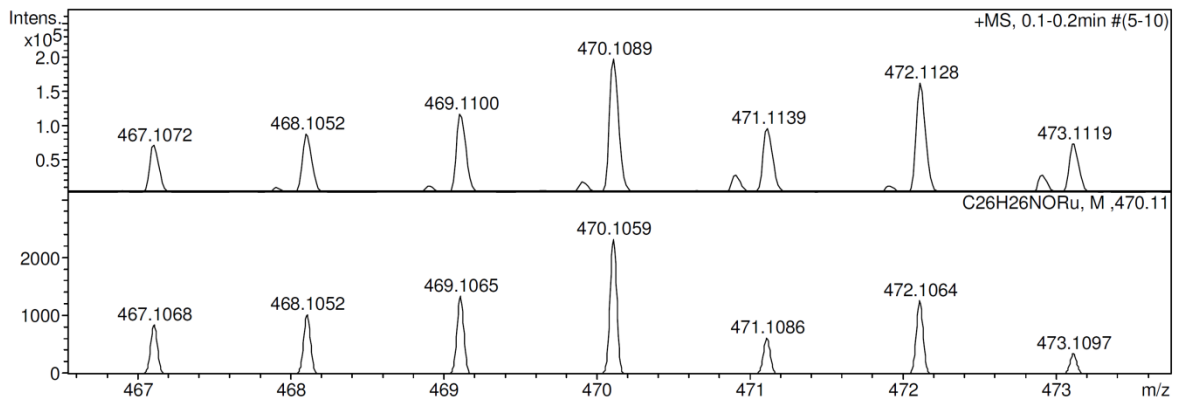

# Display Report

## Analysis Info

Analysis Name D:\Data\new user data 2021\Oct-2021\12-Oct\Dr.M.Kapur-PK-07-1267-2A.d  
Method tune mix\_low.New.021117.m  
Sample Name PK-07-1267-2A  
Comment

Acquisition Date 10/12/2021 11:59:06 AM  
Operator RUCHI  
Instrument micrOTOF-Q II 10330

## Acquisition Parameter

|             |            |                       |           |                  |           |
|-------------|------------|-----------------------|-----------|------------------|-----------|
| Source Type | ESI        | Ion Polarity          | Positive  | Set Nebulizer    | 0.4 Bar   |
| Focus       | Not active | Set Capillary         | 4600 V    | Set Dry Heater   | 180 °C    |
| Scan Begin  | 50 m/z     | Set End Plate Offset  | -500 V    | Set Dry Gas      | 4.0 l/min |
| Scan End    | 3000 m/z   | Set Collision Cell RF | 100.0 Vpp | Set Divert Valve | Waste     |

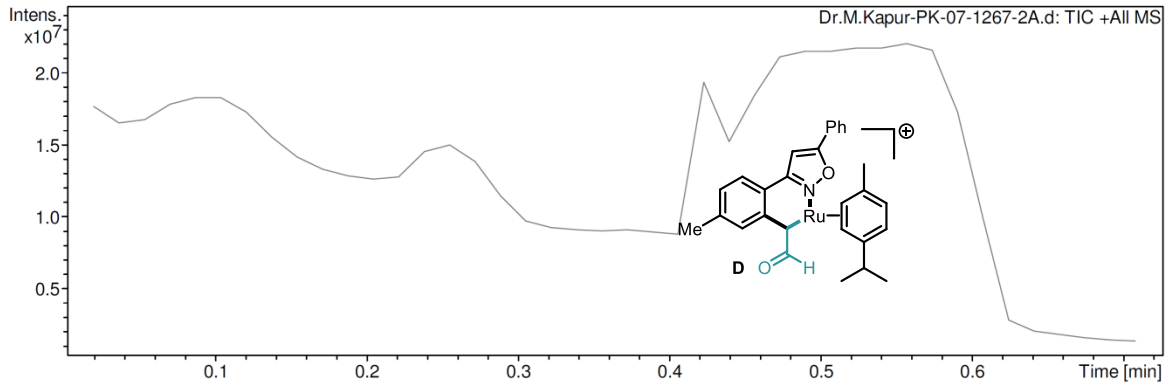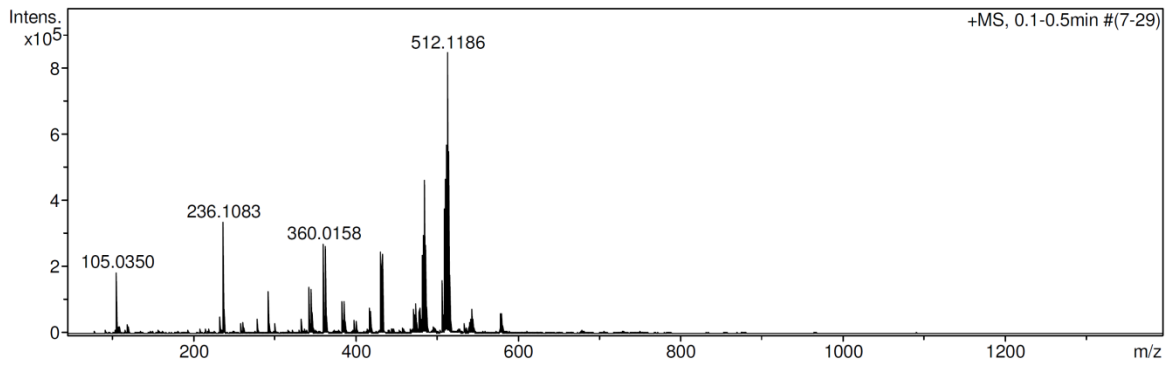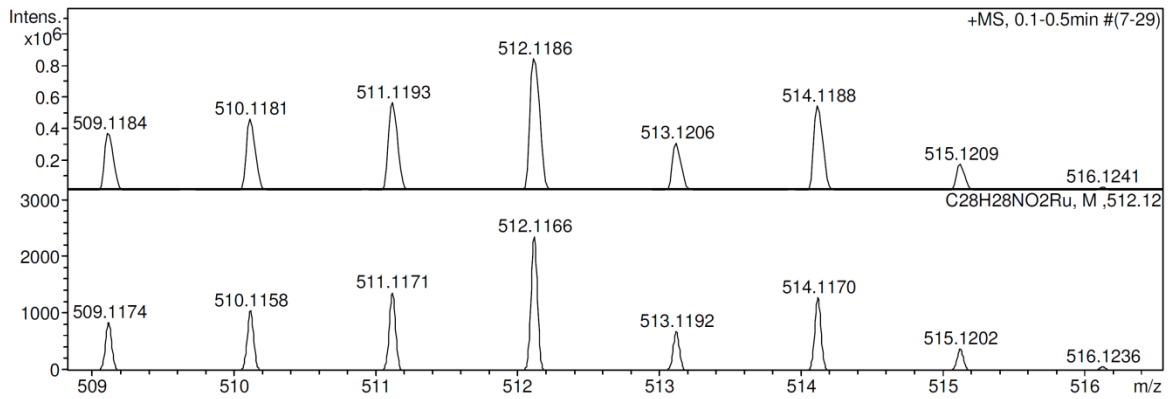



### X-ray diffraction structural analysis data of 4a

**Table 1: Crystal data and structure refinement for 4a.**

|                                             |                                                               |
|---------------------------------------------|---------------------------------------------------------------|
| CCDC                                        | 2115049                                                       |
| Identification code                         | FINAL                                                         |
| Empirical formula                           | C <sub>18</sub> H <sub>15</sub> NO                            |
| Formula weight                              | 261.31                                                        |
| Temperature/K                               | 140.0                                                         |
| Crystal system                              | monoclinic                                                    |
| Space group                                 | P2 <sub>1</sub> /c                                            |
| a/Å                                         | 10.2597(13)                                                   |
| b/Å                                         | 14.3246(16)                                                   |
| c/Å                                         | 8.6454(9)                                                     |
| α/°                                         | 90                                                            |
| β/°                                         | 91.870(4)                                                     |
| γ/°                                         | 90                                                            |
| Volume/Å <sup>3</sup>                       | 1269.9(3)                                                     |
| Z                                           | 4                                                             |
| ρ <sub>calc</sub> /cm <sup>3</sup>          | 1.367                                                         |
| μ/mm <sup>-1</sup>                          | 0.085                                                         |
| F(000)                                      | 552.0                                                         |
| Crystal size/mm <sup>3</sup>                | ? × ? × ?                                                     |
| Radiation                                   | MoKα (λ = 0.71073)                                            |
| 2Θ range for data collection/°              | 4.886 to 60.154                                               |
| Index ranges                                | -14 ≤ h ≤ 14, -20 ≤ k ≤ 20, -12 ≤ l ≤ 11                      |
| Reflections collected                       | 40037                                                         |
| Independent reflections                     | 3708 [R <sub>int</sub> = 0.0536, R <sub>sigma</sub> = 0.0246] |
| Data/restraints/parameters                  | 3708/0/182                                                    |
| Goodness-of-fit on F <sup>2</sup>           | 1.026                                                         |
| Final R indexes [I ≥ 2σ (I)]                | R <sub>1</sub> = 0.0413, wR <sub>2</sub> = 0.1075             |
| Final R indexes [all data]                  | R <sub>1</sub> = 0.0475, wR <sub>2</sub> = 0.1129             |
| Largest diff. peak/hole / e Å <sup>-3</sup> | 0.40/-0.18                                                    |

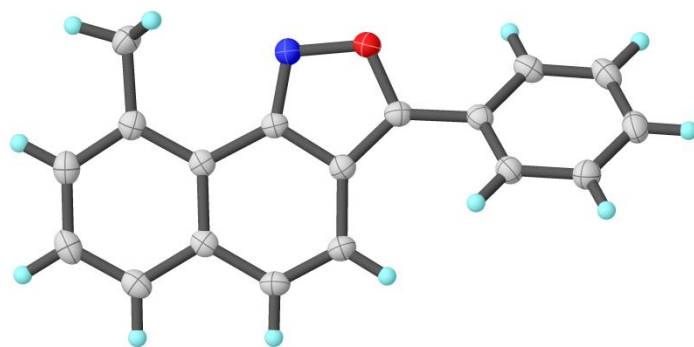

Thermal ellipsoid shown at 50% probability level.

Figure S1. X-ray structure of **(4a)** i.e. (9-methyl-3-phenylnaphtho[1,2-c]isoxazole)
